# Supplementary material
Source: publisher site journal article supplement (https://www.dovepress.com/article/supplementary_file/566659/566659%20Revised%20Supplementary%20material.docx)
Supplement: Supplementary file 1 [file 566659%20Revised%20Supplementary%20material.docx]

**Supplementary Materials**

**Frontier and Inequality Analyses of the Global Burden of Ectopic Pregnancy: Insights from the GBD 2021**

Xiaowei Cao1, Zhuying Yu1, Shengsheng Wu*,1

**Additional file:**

**Table S1. Incidence of EP in 1990 and 2021 for female with EAPC from 1990 and 2021 in countries or territories**

| **Location** | **1990** | | **2021** | | **EAPC % (95% CI) 1990–2021** |
| --- | --- | --- | --- | --- | --- |
| **Cases (95% UI)** | **Age‑standardized incidence per 100 000 population (95% UI)** | **Cases (95% UI)** | **Age‑standardized incidence per 100 000 population (95% UI)** |
|  |
| Afghanistan | 17438 (13703 - 21538) | 456.57 (354.99 - 572) | 45778 (35189 - 58383) | 341.49 (260.5 - 438.82) | -0.8 (-0.92--0.69) |  |
| Albania | 4743 (3445 - 6304) | 255.41 (188.29 - 337.15) | 1780 (1311 - 2349) | 143.23 (105.68 - 187.82) | -1.8 (-2.06--1.54) |  |
| Algeria | 32591 (24699 - 41912) | 308.1 (232.23 - 396.46) | 46040 (33903 - 60328) | 186.75 (139.23 - 243.36) | -0.84 (-1.23--0.45) |  |
| American Samoa | 116 (88 - 151) | 467.22 (354.8 - 608.19) | 56 (42 - 72) | 258.97 (195.79 - 338.97) | -1.9 (-1.97--1.83) |  |
| Andorra | 50 (37 - 67) | 150.56 (110.85 - 200.23) | 57 (42 - 77) | 141.88 (104.74 - 191.22) | -0.18 (-0.23--0.13) |  |
| Angola | 29184 (22351 - 36115) | 626.99 (481.61 - 773.69) | 59944 (46017 - 75530) | 389.49 (299.04 - 489.84) | -1.45 (-1.58--1.32) |  |
| Antigua and Barbuda | 36 (28 - 47) | 104.12 (79.88 - 134.75) | 34 (25 - 44) | 70.09 (52.41 - 91.02) | -1.43 (-1.5--1.35) |  |
| Argentina | 76373 (58145 - 98248) | 476.12 (361.25 - 615.31) | 84794 (63790 - 108855) | 352.25 (264.11 - 450.9) | -0.71 (-0.79--0.62) |  |
| Armenia | 4210 (3058 - 5431) | 221.16 (162.65 - 287.55) | 1808 (1364 - 2329) | 124.31 (94.11 - 162.27) | -1.47 (-1.86--1.08) |  |
| Australia | 4586 (3285 - 6124) | 50.15 (35.91 - 66.82) | 6411 (4668 - 8665) | 50.12 (36.71 - 67.53) | -0.89 (-1.65--0.12) |  |
| Austria | 15816 (12096 - 20499) | 383.21 (295.31 - 494.1) | 16094 (11812 - 20977) | 393.26 (288.09 - 513.13) | 0.09 (-0.13-0.31) |  |
| Azerbaijan | 11654 (8536 - 15284) | 266.27 (197.22 - 342.96) | 7948 (5922 - 10246) | 150.7 (111.07 - 195.99) | -1.18 (-1.48--0.87) |  |
| Bahrain | 533 (398 - 702) | 214.44 (161.28 - 279.08) | 692 (525 - 902) | 102.25 (77.55 - 133.11) | -2.21 (-2.46--1.95) |  |
| Bangladesh | 234798 (176213 - 300584) | 449.07 (338.85 - 572.22) | 159977 (121252 - 205333) | 167.73 (127.31 - 213.74) | -3.12 (-3.18--3.06) |  |
| Barbados | 134 (101 - 177) | 91.92 (69.25 - 120.58) | 97 (73 - 127) | 69.17 (52.68 - 91.08) | -0.87 (-1.12--0.61) |  |
| Belarus | 16393 (11680 - 22239) | 317.65 (226.08 - 430.41) | 13609 (9834 - 18089) | 321.42 (232.5 - 426.89) | 1.12 (0.69-1.55) |  |
| Belgium | 12536 (8885 - 16914) | 247.01 (174.89 - 330.62) | 12881 (9406 - 17280) | 255.8 (186.23 - 344.21) | 0.29 (0.21-0.36) |  |
| Belize | 197 (149 - 254) | 232.72 (178.4 - 297.52) | 241 (183 - 315) | 98.37 (74.3 - 128.97) | -2.45 (-2.57--2.33) |  |
| Benin | 13324 (10217 - 16683) | 598.98 (465.28 - 743.33) | 30287 (22447 - 38451) | 465.19 (346.26 - 584.6) | -0.74 (-0.79--0.69) |  |
| Bermuda | 31 (23 - 41) | 82.23 (61.4 - 109.2) | 23 (17 - 30) | 78.09 (57.53 - 103.18) | -0.04 (-0.27-0.18) |  |
| Bhutan | 1473 (1104 - 1855) | 506.02 (384.85 - 641.48) | 818 (605 - 1049) | 187.35 (139.3 - 238.72) | -3.51 (-3.67--3.35) |  |
| Bolivia | 16070 (12550 - 20733) | 535.68 (419.69 - 686.67) | 17500 (13309 - 22519) | 274.55 (209.97 - 354.01) | -2.18 (-2.2--2.16) |  |
| Bosnia and Herzegovina | 3705 (2709 - 4840) | 152.43 (112.05 - 198.68) | 1537 (1147 - 1984) | 112.81 (83.59 - 145.28) | -0.91 (-1.25--0.57) |  |
| Botswana | 4821 (3680 - 6029) | 740.2 (573.48 - 905.89) | 4176 (3152 - 5230) | 296.06 (223.61 - 371.64) | -2.87 (-2.93--2.8) |  |
| Brazil | 30276 (24523 - 36370) | 38.19 (31.16 - 45.93) | 77721 (57776 - 100404) | 65.55 (48.54 - 84.55) | 2.58 (1.99-3.18) |  |
| Brunei | 232 (175 - 303) | 153.12 (116.45 - 199.29) | 213 (157 - 283) | 80.56 (59.61 - 106.38) | -2.16 (-2.34--1.99) |  |
| Bulgaria | 5499 (3850 - 7415) | 147.03 (102.63 - 198.64) | 3515 (2691 - 4496) | 138.36 (103.32 - 178.27) | 0.72 (0.4-1.04) |  |
| Burkina Faso | 26824 (20579 - 33987) | 642.06 (489.56 - 806.01) | 55792 (42940 - 69594) | 510.23 (393.22 - 638.2) | -0.79 (-0.84--0.74) |  |
| Burundi | 14687 (11205 - 18707) | 589.06 (455.76 - 748.39) | 26256 (19950 - 33174) | 431.1 (328.39 - 542.12) | -0.95 (-1.05--0.85) |  |
| Cambodia | 16539 (12665 - 21337) | 335.39 (255.51 - 429.69) | 14633 (11034 - 19021) | 153.52 (116.58 - 198.8) | -2.58 (-2.79--2.38) |  |
| Cameroon | 26027 (19905 - 33424) | 535.07 (417.76 - 674.46) | 56804 (43645 - 71258) | 353.13 (275.36 - 441.9) | -1.15 (-1.28--1.03) |  |
| Canada | 16071 (11440 - 21879) | 102.31 (73.75 - 138.51) | 17463 (12678 - 23466) | 100.62 (73.06 - 135.36) | 0.24 (0.09-0.38) |  |
| Cape Verde | 646 (493 - 817) | 406.88 (314.86 - 514.56) | 555 (413 - 711) | 174.92 (130.36 - 221.07) | -2.69 (-2.92--2.46) |  |
| Central African Republic | 7133 (5464 - 8875) | 545.59 (419 - 672.53) | 10119 (7815 - 12845) | 360.47 (280.23 - 451.43) | -1.28 (-1.37--1.18) |  |
| Chad | 17906 (13508 - 22745) | 649.25 (495.39 - 814.72) | 45084 (34948 - 58039) | 574.97 (451.74 - 720.61) | -0.35 (-0.39--0.3) |  |
| Chile | 33430 (24763 - 44185) | 440.6 (327.18 - 581.44) | 29530 (21887 - 38644) | 300.5 (223.93 - 391.14) | -1.08 (-1.21--0.95) |  |
| China | 2244948 (1671217 - 2950817) | 320.33 (239.84 - 420.28) | 1525864 (1181694 - 1970718) | 231.8 (178.21 - 297.18) | -0.23 (-0.69-0.23) |  |
| Colombia | 48161 (37311 - 60390) | 267.44 (208.03 - 333.58) | 47018 (36255 - 60439) | 175.25 (135.43 - 224.73) | -1.44 (-1.51--1.37) |  |
| Comoros | 1180 (906 - 1479) | 578.31 (449.82 - 728.91) | 951 (729 - 1215) | 242.36 (186.09 - 310.34) | -2.81 (-2.84--2.77) |  |
| Congo | 5201 (4016 - 6589) | 460.85 (360.05 - 566.16) | 6887 (5173 - 8693) | 237.3 (178.65 - 300.28) | -1.9 (-2.13--1.67) |  |
| Cook Islands | 27 (21 - 35) | 292.22 (225.01 - 375.01) | 13 (10 - 16) | 152.42 (116.92 - 198.68) | -2.35 (-2.44--2.25) |  |
| Costa Rica | 4396 (3394 - 5652) | 267.34 (207.3 - 338.47) | 3695 (2812 - 4807) | 137.65 (104.9 - 176.45) | -2 (-2.22--1.78) |  |
| Cote d'Ivoire | 32309 (24801 - 40418) | 592.06 (462.27 - 732.09) | 53325 (40527 - 66648) | 396.85 (306.45 - 493.08) | -1.23 (-1.26--1.19) |  |
| Croatia | 3345 (2447 - 4343) | 143.88 (105.39 - 187.59) | 2278 (1748 - 2979) | 128.86 (98.22 - 167.73) | -0.24 (-0.5-0.02) |  |
| Cuba | 4725 (3539 - 6197) | 72.73 (54.71 - 95.38) | 3229 (2441 - 4218) | 68 (51.1 - 88.89) | 0.26 (0.09-0.44) |  |
| Cyprus | 735 (544 - 981) | 181.48 (134.68 - 242.38) | 913 (672 - 1225) | 112.1 (82.74 - 150.29) | -1.44 (-1.65--1.22) |  |
| Czech Republic | 10397 (7493 - 13796) | 230.59 (165.5 - 308.19) | 9298 (6896 - 12227) | 218.2 (160.29 - 287.11) | 0.84 (0.38-1.3) |  |
| Democratic Republic of the Congo | 103952 (80447 - 130663) | 609.68 (474.27 - 764.63) | 156747 (119788 - 198107) | 373.49 (286.61 - 473.57) | -1.38 (-1.57--1.18) |  |
| Denmark | 6538 (4716 - 8629) | 258.34 (185.49 - 341.13) | 7165 (5130 - 9707) | 284.63 (204.14 - 386.01) | 0.19 (0.12-0.25) |  |
| Djibouti | 1021 (778 - 1301) | 533.92 (403.82 - 675.49) | 2032 (1545 - 2583) | 306.42 (233.7 - 387.89) | -1.78 (-1.89--1.67) |  |
| Dominica | 68 (51 - 86) | 201.19 (153.94 - 256.21) | 29 (22 - 37) | 86.61 (65.31 - 111.62) | -2.94 (-3.16--2.73) |  |
| Dominican Republic | 6852 (5143 - 8834) | 168.78 (127.95 - 216.23) | 6749 (5035 - 8787) | 112.96 (84.35 - 146.41) | -1.49 (-1.59--1.38) |  |
| Ecuador | 17363 (13482 - 21778) | 340.44 (265.88 - 428.41) | 25990 (20711 - 32449) | 270.64 (215.93 - 337.56) | -0.47 (-0.61--0.32) |  |
| Egypt | 82844 (63505 - 105930) | 313.3 (239.16 - 400.17) | 91608 (69579 - 117341) | 170.38 (129.49 - 217.62) | -1.69 (-2.38--1) |  |
| El Salvador | 8622 (6744 - 10757) | 327.18 (256.04 - 410.28) | 5824 (4433 - 7520) | 161.91 (124.35 - 207.32) | -2.36 (-2.57--2.14) |  |
| Equatorial Guinea | 1159 (893 - 1481) | 574.89 (446.4 - 727.66) | 1816 (1371 - 2309) | 236.47 (179.45 - 301.15) | -2.94 (-3.11--2.77) |  |
| Eritrea | 8719 (6760 - 11002) | 571.49 (444.53 - 716.35) | 11450 (8806 - 14653) | 345 (265.14 - 440.84) | -1.69 (-1.79--1.6) |  |
| Estonia | 2676 (1961 - 3482) | 363.81 (267.95 - 479.03) | 2273 (1658 - 3031) | 384.13 (282.65 - 505.28) | 1.17 (0.81-1.53) |  |
| Ethiopia | 147638 (115632 - 184471) | 653.09 (509.65 - 797.46) | 220283 (169112 - 272950) | 408.53 (318.18 - 510.01) | -1.74 (-1.83--1.65) |  |
| Federated States of Micronesia | 227 (175 - 292) | 514.15 (394.45 - 665.44) | 135 (103 - 175) | 268.66 (202.76 - 350.03) | -2.01 (-2.07--1.96) |  |
| Fiji | 1125 (863 - 1457) | 275.58 (212.44 - 357.35) | 1208 (909 - 1593) | 261.54 (196.43 - 344.74) | -0.07 (-0.17-0.04) |  |
| Finland | 5295 (3833 - 7118) | 211.44 (151.75 - 281.33) | 4085 (2966 - 5486) | 174.12 (126.12 - 233.91) | -0.55 (-0.72--0.39) |  |
| France | 58135 (42241 - 79484) | 197.21 (142.98 - 268.39) | 59635 (43359 - 81054) | 216.07 (155.18 - 295.33) | 0.49 (0.33-0.65) |  |
| Gabon | 2059 (1556 - 2654) | 451.73 (345.94 - 573.95) | 2300 (1716 - 2957) | 229.63 (172.35 - 295.22) | -1.99 (-2.15--1.84) |  |
| Georgia | 5218 (3823 - 6795) | 183.4 (134.72 - 240.24) | 3272 (2582 - 4110) | 206.58 (163.92 - 259.25) | 1.18 (0.86-1.49) |  |
| Germany | 30940 (22350 - 41967) | 74.43 (53.89 - 99.87) | 30339 (26373 - 36340) | 84.06 (72.99 - 100.05) | 0.77 (0.61-0.93) |  |
| Ghana | 34349 (26808 - 43459) | 490.28 (380.07 - 620.42) | 54099 (40572 - 68757) | 291.49 (220.36 - 369.98) | -1.74 (-1.78--1.69) |  |
| Greece | 7915 (5784 - 10538) | 158.3 (115.48 - 210.91) | 7599 (5935 - 9840) | 177.68 (136.41 - 231.6) | 0.69 (0.52-0.85) |  |
| Greenland | 46 (34 - 60) | 137.08 (102.59 - 175.44) | 32 (24 - 42) | 116.81 (86.56 - 153.91) | -0.7 (-0.78--0.61) |  |
| Grenada | 67 (50 - 86) | 164.77 (125.35 - 211.33) | 46 (34 - 59) | 89.33 (66.78 - 116.69) | -1.98 (-2.01--1.94) |  |
| Guam | 218 (164 - 282) | 287.38 (218.06 - 370.82) | 186 (142 - 242) | 266.02 (203.09 - 346.49) | -0.22 (-0.4--0.03) |  |
| Guatemala | 20453 (16178 - 26303) | 578.5 (454.27 - 745.58) | 20926 (16116 - 26967) | 234.76 (182.85 - 302.05) | -2.98 (-3.06--2.9) |  |
| Guinea | 16583 (12808 - 20672) | 597.11 (463.77 - 737.98) | 26959 (20570 - 33610) | 403.22 (310.23 - 499.37) | -1.32 (-1.36--1.27) |  |
| Guinea-Bissau | 2789 (2114 - 3464) | 607.63 (471.62 - 754.53) | 4296 (3251 - 5344) | 415.72 (318.39 - 512.24) | -1.23 (-1.3--1.15) |  |
| Guyana | 735 (551 - 955) | 168.08 (127.7 - 215.05) | 436 (327 - 570) | 105.38 (79.59 - 138.97) | -1.51 (-1.55--1.47) |  |
| Haiti | 9719 (7343 - 12522) | 326.23 (244.55 - 415.82) | 13417 (10099 - 17434) | 184.76 (138.93 - 239.06) | -1.84 (-1.88--1.8) |  |
| Honduras | 10668 (8342 - 13606) | 520.58 (405.69 - 662.24) | 12266 (9361 - 15656) | 212.77 (164.77 - 271.17) | -2.96 (-3.1--2.83) |  |
| Hungary | 7257 (5280 - 9455) | 161.63 (116.79 - 212.97) | 5405 (4092 - 7205) | 137.43 (103.95 - 182.32) | -0.11 (-0.43-0.22) |  |
| Iceland | 339 (248 - 450) | 246.87 (181.55 - 326.57) | 340 (251 - 451) | 208.58 (154.47 - 275.49) | -0.5 (-0.62--0.38) |  |
| India | 1743035 (1348971 - 2191135) | 414.63 (323.9 - 515.53) | 1441902 (1092928 - 1873614) | 184.53 (140.28 - 239.91) | -2.65 (-2.69--2.6) |  |
| Indonesia | 99097 (73893 - 130948) | 101.21 (75.93 - 132.49) | 100179 (76097 - 127958) | 65.56 (49.75 - 83.98) | -1.19 (-1.31--1.07) |  |
| Iran | 34084 (26451 - 43066) | 139 (107.79 - 174.94) | 28568 (21758 - 37365) | 57.1 (43.95 - 74) | -1.9 (-2.39--1.41) |  |
| Iraq | 31942 (24742 - 40279) | 408.27 (313.65 - 520.47) | 37724 (28490 - 48400) | 179.85 (135.24 - 229.7) | -2.55 (-2.64--2.46) |  |
| Ireland | 4475 (3304 - 5856) | 255.75 (188.53 - 335.21) | 5243 (3709 - 7077) | 222.12 (157.14 - 301.94) | -0.19 (-0.32--0.07) |  |
| Israel | 8061 (6099 - 10730) | 328.72 (248.59 - 438.06) | 15760 (11856 - 20589) | 361.92 (269.17 - 474.91) | 0.31 (0.25-0.38) |  |
| Italy | 27726 (18169 - 41282) | 96.9 (63.47 - 144.34) | 29289 (23288 - 36989) | 125.47 (99.69 - 158.84) | 0.98 (0.59-1.36) |  |
| Jamaica | 1664 (1270 - 2167) | 132.27 (101.67 - 171.88) | 1135 (856 - 1485) | 71.29 (54.03 - 92.69) | -2.14 (-2.2--2.08) |  |
| Japan | 40958 (29940 - 55802) | 73.36 (53.28 - 99.97) | 31490 (23539 - 42041) | 67.92 (50.22 - 91.3) | -0.03 (-0.18-0.11) |  |
| Jordan | 6989 (5318 - 8875) | 462.99 (350.79 - 593.82) | 12582 (9643 - 16322) | 208.67 (158.94 - 271.9) | -2.28 (-2.38--2.19) |  |
| Kazakhstan | 22741 (17004 - 29557) | 257.32 (193.76 - 334.49) | 24734 (18527 - 31905) | 254.32 (190.45 - 326.13) | 1.18 (0.71-1.66) |  |
| Kenya | 58745 (45229 - 74381) | 554.62 (436.9 - 681.54) | 78520 (60698 - 98421) | 285.86 (224.21 - 355.06) | -1.99 (-2.03--1.94) |  |
| Kiribati | 180 (138 - 239) | 471.34 (366.42 - 622.72) | 207 (158 - 272) | 315.55 (239.32 - 413.23) | -1.26 (-1.29--1.23) |  |
| Kuwait | 1467 (1106 - 1870) | 163.04 (123.69 - 205.96) | 2555 (1903 - 3349) | 74.13 (54.95 - 95.52) | -2.96 (-3.38--2.53) |  |
| Kyrgyzstan | 8414 (6315 - 10870) | 367.92 (279.77 - 468.78) | 9634 (7291 - 12240) | 266.35 (202.45 - 337.12) | -0.06 (-0.43-0.32) |  |
| Laos | 6135 (4846 - 7828) | 329.85 (260.71 - 416.27) | 5695 (4285 - 7513) | 136.93 (104.06 - 179.97) | -3.31 (-3.5--3.12) |  |
| Latvia | 4702 (3334 - 6209) | 372.53 (261.92 - 494.66) | 3157 (2280 - 4100) | 391.72 (283.25 - 504.13) | 1.26 (0.74-1.78) |  |
| Lebanon | 3553 (2712 - 4601) | 230.42 (176.93 - 296.17) | 3252 (2430 - 4292) | 101.16 (75.96 - 132.07) | -2.64 (-2.8--2.48) |  |
| Lesotho | 2190 (1693 - 2740) | 284.66 (221.64 - 351.48) | 1495 (1111 - 1946) | 140.38 (106.66 - 180.43) | -2.25 (-2.29--2.21) |  |
| Liberia | 6819 (5218 - 8554) | 616.35 (476.84 - 770.06) | 9628 (7420 - 11936) | 351.35 (273.65 - 430.47) | -1.8 (-1.91--1.69) |  |
| Libya | 5327 (4095 - 6827) | 317.37 (242.27 - 404.33) | 3896 (2902 - 5072) | 94.22 (70.7 - 122.66) | -3.65 (-3.79--3.52) |  |
| Lithuania | 6765 (4898 - 8964) | 363.81 (263.64 - 481.25) | 4070 (2963 - 5337) | 348.1 (253.52 - 455.73) | 0.77 (0.27-1.28) |  |
| Luxembourg | 415 (300 - 560) | 197.9 (143.19 - 264.81) | 631 (451 - 870) | 186.03 (134.38 - 255.18) | -0.37 (-0.45--0.3) |  |
| Macedonia | 1933 (1420 - 2558) | 187.46 (137.8 - 248.54) | 1268 (950 - 1696) | 121.07 (90.78 - 159.79) | -1.49 (-1.69--1.29) |  |
| Madagascar | 28969 (22093 - 36760) | 526.57 (407.05 - 660.59) | 43795 (33228 - 55823) | 294.49 (225.72 - 367.24) | -1.85 (-2.01--1.69) |  |
| Malawi | 28082 (21285 - 35635) | 622.84 (484.95 - 772.15) | 32474 (24767 - 41428) | 326.72 (250.99 - 410.73) | -2.13 (-2.3--1.95) |  |
| Malaysia | 19960 (14747 - 26261) | 217.81 (162.47 - 282.38) | 22930 (17060 - 30596) | 128.88 (96.1 - 171.01) | -1.89 (-2.04--1.74) |  |
| Maldives | 329 (250 - 422) | 361.04 (277.24 - 463.09) | 311 (231 - 409) | 121.56 (91.3 - 159.35) | -3.15 (-3.58--2.72) |  |
| Mali | 26397 (20401 - 33266) | 677.87 (524.21 - 843.72) | 59645 (45772 - 75834) | 549.05 (429.12 - 687.81) | -0.68 (-0.72--0.64) |  |
| Malta | 196 (146 - 265) | 105.56 (77.7 - 142.48) | 155 (115 - 211) | 78.89 (58.97 - 106.79) | -0.9 (-1.4--0.4) |  |
| Marshall Islands | 90 (68 - 116) | 439.41 (332.4 - 574.25) | 78 (60 - 100) | 261.84 (200.25 - 335.7) | -1.55 (-1.6--1.51) |  |
| Mauritania | 5139 (3920 - 6354) | 556.47 (424.14 - 683.99) | 6805 (5174 - 8534) | 327.44 (251.59 - 411.31) | -1.46 (-1.58--1.35) |  |
| Mauritius | 769 (575 - 1009) | 118.23 (88.81 - 153.73) | 473 (352 - 621) | 75.91 (56.46 - 100.16) | -1.59 (-1.71--1.48) |  |
| Mexico | 122594 (88389 - 166599) | 280.58 (202.2 - 376.2) | 142783 (112542 - 179268) | 204.15 (161.05 - 256.17) | -1.58 (-1.86--1.31) |  |
| Moldova | 9540 (6978 - 12622) | 417.33 (304.52 - 548.61) | 4369 (3259 - 5807) | 253.93 (186.38 - 333.93) | -0.95 (-1.43--0.46) |  |
| Monaco | 25 (18 - 33) | 182.54 (133.9 - 242.51) | 26 (19 - 34) | 187.03 (135.46 - 250.65) | 0.03 (0.01-0.06) |  |
| Mongolia | 4765 (3562 - 6117) | 447.55 (343.95 - 561.99) | 5504 (4166 - 7054) | 318.04 (242.08 - 407.73) | -0.06 (-0.68-0.56) |  |
| Montenegro | 539 (392 - 703) | 168.04 (122.41 - 219.35) | 413 (305 - 548) | 148.8 (109.74 - 197.99) | -0.35 (-0.41--0.3) |  |
| Morocco | 36231 (27814 - 45294) | 296.14 (225.52 - 374.31) | 26840 (20565 - 34231) | 135.61 (103.94 - 172.72) | -2.39 (-2.51--2.26) |  |
| Mozambique | 35081 (26994 - 44320) | 549.06 (423.84 - 684.41) | 57430 (43835 - 72325) | 373.87 (288.8 - 465.65) | -1.17 (-1.31--1.02) |  |
| Myanmar | 43855 (33388 - 56362) | 215.25 (165.14 - 274.24) | 38171 (28765 - 49285) | 127.12 (95.69 - 164.66) | -1.51 (-1.58--1.44) |  |
| Namibia | 2007 (1551 - 2529) | 299.46 (231.87 - 368.95) | 2210 (1682 - 2822) | 161.67 (123.91 - 205.53) | -1.7 (-1.81--1.59) |  |
| Nauru | 24 (18 - 32) | 492.77 (369.66 - 637.83) | 18 (14 - 24) | 318.56 (242.04 - 411.34) | -1.43 (-1.45--1.4) |  |
| Nepal | 52859 (40507 - 67052) | 560.65 (430.52 - 710.62) | 36275 (26862 - 47203) | 185.45 (137.53 - 238.4) | -4.02 (-4.31--3.72) |  |
| Netherlands | 15844 (11481 - 21650) | 193.46 (140.5 - 263.97) | 14681 (10707 - 19811) | 199.3 (145.03 - 269) | 0.26 (0.13-0.38) |  |
| New Zealand | 5171 (3514 - 7343) | 278.31 (189.24 - 393.87) | 7470 (5598 - 9554) | 299.07 (224.73 - 380.92) | -0.4 (-0.61--0.18) |  |
| Nicaragua | 7383 (5745 - 9314) | 399.46 (311.7 - 504.6) | 7060 (5423 - 9002) | 188.49 (144.66 - 240.45) | -2.2 (-2.44--1.97) |  |
| Niger | 25087 (19341 - 31646) | 711.65 (550.84 - 890.01) | 67376 (51742 - 85174) | 641.3 (498.92 - 794.53) | -0.38 (-0.43--0.34) |  |
| Nigeria | 255465 (199555 - 316490) | 642.37 (506.62 - 787.94) | 468611 (366599 - 580090) | 417.11 (327.4 - 514.51) | -1.25 (-1.37--1.12) |  |
| Niue | 3 (2 - 4) | 315.82 (243.92 - 410.7) | 2 (1 - 2) | 212.62 (161.65 - 283.94) | -1.11 (-1.18--1.05) |  |
| North Korea | 45601 (33422 - 61032) | 398.51 (292.76 - 534.08) | 26026 (18387 - 35528) | 194.55 (137.86 - 265.14) | -2.35 (-2.48--2.22) |  |
| Northern Mariana Islands | 80 (61 - 105) | 257.91 (197.46 - 333.52) | 41 (31 - 53) | 196.85 (151.4 - 255.19) | -0.84 (-0.86--0.82) |  |
| Norway | 3776 (2462 - 5656) | 179.39 (116.78 - 268.9) | 3982 (2528 - 6005) | 159.54 (101.4 - 239.36) | -0.27 (-0.46--0.08) |  |
| Oman | 2523 (1943 - 3235) | 380.98 (293.64 - 488.72) | 3216 (2427 - 4182) | 137.18 (104.62 - 177.04) | -3.14 (-3.21--3.06) |  |
| Pakistan | 342041 (265870 - 421832) | 747.49 (585.91 - 929.17) | 479518 (369612 - 602198) | 382.55 (296.74 - 477.95) | -2.26 (-2.3--2.21) |  |
| Palau | 21 (16 - 27) | 248.31 (192.04 - 319.67) | 13 (10 - 18) | 201.25 (152.31 - 265.31) | -0.51 (-0.58--0.44) |  |
| Palestine | 3587 (2749 - 4544) | 413.02 (314.11 - 517.39) | 4397 (3345 - 5703) | 162.4 (125.25 - 208.33) | -3.14 (-3.39--2.89) |  |
| Panama | 3064 (2388 - 3920) | 240.28 (187.6 - 307.33) | 4176 (3248 - 5394) | 195.13 (151.79 - 252.74) | -0.48 (-0.59--0.38) |  |
| Papua New Guinea | 10094 (7723 - 13124) | 540.81 (416.91 - 702.94) | 20815 (16074 - 26995) | 392.73 (302.35 - 506.22) | -1.09 (-1.18--1.01) |  |
| Paraguay | 1176 (864 - 1483) | 64.29 (48.06 - 80.72) | 1361 (1010 - 1747) | 34.91 (26.09 - 44.84) | -1.77 (-1.85--1.69) |  |
| Peru | 41862 (32200 - 53964) | 391.18 (301.72 - 503.52) | 46730 (35619 - 61081) | 234.67 (179.73 - 304.46) | -1.57 (-1.69--1.45) |  |
| Philippines | 149865 (118269 - 191789) | 490.66 (385.8 - 625.7) | 174060 (136323 - 223264) | 291.47 (227.4 - 370.83) | -1.56 (-1.68--1.43) |  |
| Poland | 11716 (8473 - 15535) | 65.84 (47.07 - 88.41) | 7651 (6431 - 9014) | 44.8 (37.64 - 53.85) | -0.87 (-1.24--0.49) |  |
| Portugal | 5215 (3872 - 6915) | 104.32 (77.31 - 138.31) | 4422 (3356 - 5803) | 100.1 (76.26 - 131.79) | -0.24 (-0.37--0.11) |  |
| Puerto Rico | 1882 (1408 - 2469) | 97.74 (73.17 - 128.5) | 606 (457 - 787) | 42.06 (31.62 - 54.95) | -2.71 (-2.94--2.48) |  |
| Qatar | 615 (460 - 806) | 349.78 (265.24 - 451.18) | 2059 (1505 - 2701) | 148.6 (110.16 - 193.43) | -2.67 (-2.73--2.6) |  |
| Romania | 21174 (15113 - 28489) | 189.98 (135.47 - 252.65) | 13501 (10022 - 17206) | 190.14 (139.9 - 245.59) | 0.74 (0.37-1.12) |  |
| Russian Federation | 273578 (209529 - 347920) | 370.18 (281.39 - 473.29) | 279469 (212651 - 357417) | 411.57 (314.72 - 533.47) | 1.58 (1.08-2.08) |  |
| Rwanda | 17927 (13715 - 22643) | 588.68 (449.43 - 740.77) | 18587 (13971 - 23987) | 266.39 (201.07 - 341.78) | -2.97 (-3.16--2.78) |  |
| Saint Kitts and Nevis | 28 (21 - 36) | 127.2 (96.17 - 165.13) | 19 (14 - 24) | 60.28 (46.11 - 78.21) | -2.56 (-2.68--2.44) |  |
| Saint Lucia | 106 (81 - 136) | 152.35 (116.91 - 193.37) | 61 (46 - 79) | 66.66 (50.31 - 87.13) | -2.73 (-2.93--2.54) |  |
| Saint Vincent and the Grenadines | 78 (60 - 102) | 141.67 (108.08 - 181.75) | 50 (39 - 64) | 91.49 (70.91 - 116.81) | -1.21 (-1.36--1.05) |  |
| Samoa | 214 (164 - 279) | 302.29 (234.57 - 393.84) | 337 (256 - 439) | 356.79 (269.99 - 467.04) | 1.06 (0.86-1.26) |  |
| San Marino | 20 (15 - 27) | 159.13 (116.56 - 211.86) | 23 (17 - 31) | 174.55 (130.83 - 234.09) | 0.37 (0.33-0.4) |  |
| Sao Tome and Principe | 259 (198 - 330) | 507.19 (393.16 - 638.12) | 232 (176 - 294) | 204.32 (155.25 - 256.79) | -2.89 (-3.18--2.6) |  |
| Saudi Arabia | 24601 (18905 - 31577) | 407.85 (312.12 - 524.08) | 20903 (15387 - 27402) | 90.91 (67.6 - 119.15) | -5.06 (-5.19--4.94) |  |
| Senegal | 20962 (15829 - 26206) | 622.12 (470.52 - 776.79) | 25276 (19543 - 31737) | 328.89 (251.75 - 415.72) | -1.78 (-1.88--1.67) |  |
| Serbia | 6685 (4897 - 8918) | 146.36 (106.99 - 195.11) | 4218 (3142 - 5514) | 107.53 (80.16 - 140.17) | -0.94 (-1.27--0.62) |  |
| Seychelles | 54 (40 - 70) | 139.04 (104.82 - 178.29) | 58 (43 - 75) | 121.38 (91.14 - 156.87) | -0.02 (-0.29-0.25) |  |
| Sierra Leone | 11326 (8714 - 14367) | 549.47 (428.26 - 687.36) | 16576 (12574 - 20947) | 360.58 (277.75 - 447.06) | -1.46 (-1.59--1.32) |  |
| Singapore | 1672 (1225 - 2208) | 81.49 (60 - 107.35) | 1715 (1248 - 2347) | 54.09 (39.71 - 73.64) | -1.38 (-1.55--1.21) |  |
| Slovakia | 5327 (3864 - 7049) | 211.13 (152.83 - 282.69) | 3852 (2860 - 5080) | 161 (119.55 - 208.6) | -0.18 (-0.77-0.41) |  |
| Slovenia | 1414 (1022 - 1866) | 142.95 (103.69 - 189.27) | 1322 (942 - 1768) | 163.85 (116.32 - 219.68) | 1 (0.76-1.24) |  |
| Solomon Islands | 991 (762 - 1283) | 720.03 (550.42 - 935.62) | 1417 (1099 - 1829) | 417.31 (321.05 - 541.98) | -1.81 (-1.86--1.75) |  |
| Somalia | 22042 (16897 - 27245) | 648.37 (499.27 - 799.09) | 48701 (37063 - 62018) | 516.73 (395.95 - 649.95) | -0.73 (-0.79--0.68) |  |
| South Africa | 17142 (13126 - 21673) | 84.85 (65.15 - 105.12) | 15960 (12064 - 20186) | 50.31 (38.33 - 64.06) | -2.21 (-2.46--1.97) |  |
| South Korea | 20163 (14303 - 27733) | 71.17 (50.67 - 97.25) | 10154 (7313 - 13945) | 44.12 (31.79 - 60.77) | -2.24 (-2.45--2.03) |  |
| South Sudan | 15710 (11889 - 20074) | 608.14 (467.95 - 755.09) | 25386 (19454 - 31779) | 556.43 (433.95 - 687.91) | -0.35 (-0.39--0.31) |  |
| Spain | 34600 (24794 - 47025) | 178.28 (127.59 - 242.67) | 34090 (25734 - 44690) | 174.5 (131.02 - 229.12) | 0.33 (0.19-0.48) |  |
| Sri Lanka | 13162 (9743 - 17151) | 138.7 (102.65 - 181.09) | 12596 (9681 - 16550) | 113 (85.93 - 148.49) | -0.38 (-0.55--0.2) |  |
| Sudan | 39331 (30183 - 49294) | 425.38 (324.35 - 532.56) | 41824 (31786 - 52490) | 182.04 (138.02 - 227.83) | -2.69 (-2.89--2.5) |  |
| Suriname | 291 (220 - 376) | 144.37 (109.88 - 185.71) | 297 (227 - 391) | 102.79 (78.3 - 135.61) | -0.9 (-0.97--0.84) |  |
| Swaziland | 1273 (986 - 1618) | 314.55 (246.29 - 393.74) | 1088 (827 - 1373) | 164.38 (125.44 - 204.59) | -2.06 (-2.09--2.04) |  |
| Sweden | 16784 (12353 - 22730) | 425.35 (311.08 - 577.35) | 15641 (11292 - 20820) | 335.84 (243.25 - 445.61) | -0.29 (-0.57--0.02) |  |
| Switzerland | 7604 (5504 - 10343) | 207.52 (150.73 - 281.52) | 8714 (6331 - 11929) | 205.14 (150.29 - 280.68) | 0.08 (-0.09-0.26) |  |
| Syria | 17507 (13409 - 21932) | 330.48 (250.96 - 413.04) | 8075 (6001 - 10369) | 120.25 (89.06 - 154.47) | -3.06 (-3.12--3) |  |
| Taiwan | 26490 (19128 - 36124) | 215.25 (156.79 - 292.1) | 21951 (15790 - 29826) | 186.77 (135.24 - 254.27) | -0.56 (-0.94--0.18) |  |
| Tajikistan | 12660 (9479 - 16292) | 501.38 (382.48 - 631.73) | 14879 (10822 - 19120) | 273.62 (200.53 - 349.49) | -1.78 (-1.86--1.7) |  |
| Tanzania | 67906 (52316 - 86028) | 571.42 (446.5 - 706.56) | 107861 (81788 - 133634) | 361.5 (275.15 - 449.87) | -1.35 (-1.44--1.25) |  |
| Thailand | 34742 (26228 - 45857) | 103.25 (78.73 - 135.73) | 21288 (16228 - 27836) | 70.21 (53.3 - 91.5) | -1.03 (-1.16--0.91) |  |
| The Bahamas | 162 (123 - 213) | 104.96 (80.05 - 136.17) | 147 (110 - 188) | 68.46 (51.23 - 87.62) | -0.73 (-0.99--0.47) |  |
| The Gambia | 2589 (2001 - 3262) | 564.15 (443.32 - 703) | 4574 (3496 - 5829) | 383.72 (292.9 - 486.83) | -1.26 (-1.36--1.15) |  |
| Timor-Leste | 1487 (1134 - 1927) | 397.47 (302.42 - 507.02) | 1496 (1115 - 1944) | 229.22 (171.86 - 297.06) | -1.96 (-2.18--1.74) |  |
| Togo | 9318 (7208 - 11738) | 563.47 (440.35 - 704.57) | 13907 (10539 - 17238) | 325.22 (246.07 - 403.3) | -1.6 (-1.71--1.49) |  |
| Tokelau | 3 (2 - 3) | 376.11 (286.59 - 493.97) | 2 (1 - 2) | 264 (203.52 - 347.91) | -1.09 (-1.11--1.07) |  |
| Tonga | 268 (206 - 353) | 659.59 (508.54 - 869.88) | 185 (139 - 245) | 380.6 (285.65 - 504.75) | -1.73 (-1.76--1.69) |  |
| Trinidad and Tobago | 752 (573 - 974) | 115.78 (88.47 - 149.04) | 544 (410 - 718) | 78.25 (59.49 - 102.66) | -0.65 (-0.89--0.4) |  |
| Tunisia | 8921 (6777 - 11675) | 219.61 (166.75 - 286.47) | 6041 (4447 - 8015) | 91.19 (67.47 - 120.67) | -2.55 (-2.66--2.44) |  |
| Turkey | 76311 (57482 - 98628) | 254.44 (193.9 - 323.08) | 61739 (46146 - 78562) | 142.36 (106.7 - 181.61) | -1.89 (-2.06--1.72) |  |
| Turkmenistan | 8144 (5921 - 10637) | 433.58 (319.85 - 562.16) | 6679 (4893 - 8681) | 258.51 (189.75 - 336.12) | -1.49 (-1.77--1.2) |  |
| Tuvalu | 31 (23 - 40) | 607.83 (466.95 - 797.11) | 19 (14 - 25) | 323.91 (245.48 - 429.2) | -2.01 (-2.15--1.88) |  |
| Uganda | 50284 (38337 - 64869) | 638.92 (494.2 - 802.15) | 79038 (60377 - 100211) | 374.19 (286.16 - 472.5) | -1.75 (-1.91--1.59) |  |
| Ukraine | 86108 (62551 - 115865) | 352.75 (254.67 - 483.58) | 55436 (41303 - 72424) | 284.8 (214.51 - 369.54) | 0.38 (-0.1-0.86) |  |
| United Arab Emirates | 1990 (1503 - 2562) | 266.56 (205.77 - 337.56) | 3770 (2759 - 4987) | 90.75 (68.95 - 117.29) | -3.5 (-3.85--3.16) |  |
| United Kingdom | 63869 (47291 - 82103) | 222.18 (165.34 - 284.06) | 69880 (52852 - 92145) | 218.94 (167.02 - 286.08) | 0.28 (0.11-0.46) |  |
| United States | 164020 (116449 - 225535) | 118.29 (84.21 - 160.7) | 116837 (93437 - 145019) | 75.91 (60.53 - 94.01) | -2.4 (-2.82--1.98) |  |
| Uruguay | 6212 (4593 - 8120) | 411.44 (304.04 - 537.71) | 5435 (4109 - 7005) | 328.98 (248.88 - 425) | -0.8 (-0.95--0.64) |  |
| Uzbekistan | 43578 (32534 - 56508) | 401.03 (304.73 - 513.71) | 43396 (31913 - 57146) | 237.89 (176.33 - 310.38) | -1.59 (-1.7--1.47) |  |
| Vanuatu | 445 (342 - 587) | 632.44 (485.6 - 833.95) | 585 (450 - 758) | 367.72 (282.35 - 476.86) | -1.79 (-1.87--1.7) |  |
| Venezuela | 30366 (23702 - 38286) | 302.59 (235.21 - 381.56) | 27634 (21625 - 35400) | 206.46 (161.85 - 266.38) | -0.96 (-1.15--0.77) |  |
| Vietnam | 61004 (45687 - 80840) | 167.49 (126.01 - 217.25) | 46117 (33488 - 61387) | 87.35 (64.23 - 115.76) | -1.9 (-2.05--1.74) |  |
| Virgin Islands, U.S. | 73 (55 - 95) | 132.85 (99.15 - 173.95) | 27 (20 - 35) | 81.06 (59.66 - 106.14) | 81.1 (59.7-106.1) |  |
| Yemen | 27078 (20757 - 34257) | 505.34 (388.74 - 640.37) | 41498 (31783 - 52201) | 248.37 (191.59 - 313.4) | -2.36 (-2.48--2.25) |  |
| Zambia | 21304 (16160 - 27060) | 580.5 (444.83 - 724.49) | 32535 (24661 - 41319) | 325.15 (247.67 - 410.52) | -1.73 (-1.93--1.53) |  |
| Zimbabwe | 14873 (11490 - 18815) | 303.25 (236.87 - 380.9) | 17849 (13464 - 22659) | 209.4 (159.2 - 263.41) | -0.87 (-0.98--0.75) |  |

CI: confidence interval, EAPC: estimated annual percent change, EP: ectopic pregnancy, UI: uncertainty interval

**Table S2. Prevalence of EP in 1990 and 2021 for female with EAPC from 1990 and 2021 in countries or territories**

| **Location** | **1990** | | **2021** | | **EAPC % (95% CI) 1990–2021** |
| --- | --- | --- | --- | --- | --- |
| **Cases (95% UI)** | **Age‑standardized prevalence per 100 000 population (95% UI)** | **Cases (95% UI)** | **Age‑standardized prevalence per 100 000 population (95% UI)** |
|  |
| Afghanistan | 143 (92 - 212) | 3.76 (2.44 - 5.47) | 377 (244 - 550) | 2.81 (1.84 - 4.14) | -0.62 (-0.71--0.54) |  |
| Albania | 39 (24 - 59) | 2.1 (1.32 - 3.18) | 15 (9 - 22) | 1.18 (0.73 - 1.79) | -1.09 (-1.25--0.92) |  |
| Algeria | 268 (165 - 401) | 2.54 (1.55 - 3.76) | 379 (232 - 582) | 1.54 (0.96 - 2.36) | -0.56 (-0.81--0.3) |  |
| American Samoa | 1 (1 - 1) | 3.84 (2.45 - 5.81) | 0 (0 - 1) | 2.13 (1.39 - 3.26) | -1.42 (-1.46--1.37) |  |
| Andorra | 0 (0 - 1) | 1.24 (0.77 - 1.91) | 0 (0 - 1) | 1.17 (0.72 - 1.76) | -0.1 (-0.13--0.07) |  |
| Angola | 240 (158 - 352) | 5.16 (3.41 - 7.55) | 493 (316 - 728) | 3.2 (2.08 - 4.76) | -1.18 (-1.28--1.08) |  |
| Antigua and Barbuda | 0 (0 - 0) | 0.86 (0.53 - 1.31) | 0 (0 - 0) | 0.58 (0.37 - 0.86) | -0.61 (-0.64--0.58) |  |
| Argentina | 628 (398 - 935) | 3.92 (2.48 - 5.83) | 698 (440 - 1044) | 2.9 (1.83 - 4.33) | -0.55 (-0.61--0.48) |  |
| Armenia | 35 (22 - 53) | 1.82 (1.17 - 2.79) | 15 (10 - 22) | 1.02 (0.66 - 1.54) | -0.83 (-1.06--0.61) |  |
| Australia | 38 (23 - 59) | 0.41 (0.25 - 0.64) | 53 (33 - 83) | 0.41 (0.26 - 0.64) | -0.21 (-0.41--0.01) |  |
| Austria | 130 (82 - 195) | 3.15 (2 - 4.72) | 132 (82 - 202) | 3.24 (2.01 - 4.9) | 0.06 (-0.1-0.23) |  |
| Azerbaijan | 96 (61 - 145) | 2.19 (1.41 - 3.28) | 65 (42 - 96) | 1.24 (0.8 - 1.82) | -0.73 (-0.92--0.54) |  |
| Bahrain | 4 (3 - 7) | 1.76 (1.12 - 2.6) | 6 (4 - 9) | 0.84 (0.53 - 1.25) | -1.23 (-1.38--1.07) |  |
| Bangladesh | 1932 (1254 - 2896) | 3.69 (2.38 - 5.56) | 1315 (832 - 1978) | 1.38 (0.88 - 2.07) | -2.16 (-2.23--2.09) |  |
| Barbados | 1 (1 - 2) | 0.76 (0.47 - 1.15) | 1 (1 - 1) | 0.57 (0.36 - 0.85) | -0.35 (-0.46--0.25) |  |
| Belarus | 135 (82 - 201) | 2.61 (1.59 - 3.89) | 112 (70 - 168) | 2.64 (1.69 - 3.92) | 0.79 (0.48-1.09) |  |
| Belgium | 103 (62 - 157) | 2.03 (1.23 - 3.07) | 106 (64 - 161) | 2.1 (1.28 - 3.18) | 0.19 (0.14-0.24) |  |
| Belize | 2 (1 - 2) | 1.91 (1.23 - 2.86) | 2 (1 - 3) | 0.81 (0.51 - 1.22) | -1.35 (-1.42--1.28) |  |
| Benin | 110 (71 - 161) | 4.93 (3.17 - 7.18) | 249 (162 - 361) | 3.83 (2.51 - 5.59) | -0.6 (-0.65--0.56) |  |
| Bermuda | 0 (0 - 0) | 0.68 (0.42 - 1.04) | 0 (0 - 0) | 0.64 (0.4 - 0.97) | -0.02 (-0.11-0.08) |  |
| Bhutan | 12 (8 - 18) | 4.16 (2.69 - 6.17) | 7 (4 - 10) | 1.54 (0.98 - 2.32) | -2.53 (-2.66--2.4) |  |
| Bolivia | 132 (84 - 196) | 4.41 (2.8 - 6.54) | 144 (92 - 212) | 2.26 (1.45 - 3.33) | -1.66 (-1.69--1.64) |  |
| Bosnia and Herzegovina | 30 (20 - 45) | 1.25 (0.8 - 1.86) | 13 (8 - 19) | 0.93 (0.58 - 1.41) | -0.47 (-0.64--0.3) |  |
| Botswana | 40 (25 - 58) | 6.09 (3.85 - 8.87) | 34 (22 - 51) | 2.44 (1.57 - 3.59) | -2.28 (-2.32--2.24) |  |
| Brazil | 249 (161 - 363) | 0.31 (0.2 - 0.45) | 640 (408 - 992) | 0.54 (0.34 - 0.84) | 0.78 (0.6-0.96) |  |
| Brunei | 2 (1 - 3) | 1.26 (0.83 - 1.9) | 2 (1 - 3) | 0.66 (0.42 - 1.02) | -1.04 (-1.13--0.94) |  |
| Bulgaria | 45 (28 - 70) | 1.21 (0.75 - 1.87) | 29 (19 - 43) | 1.14 (0.72 - 1.67) | 0.36 (0.2-0.53) |  |
| Burkina Faso | 221 (144 - 329) | 5.28 (3.44 - 7.74) | 459 (303 - 686) | 4.2 (2.74 - 6.23) | -0.65 (-0.7--0.61) |  |
| Burundi | 121 (79 - 180) | 4.84 (3.16 - 7.15) | 216 (141 - 321) | 3.54 (2.36 - 5.27) | -0.77 (-0.85--0.69) |  |
| Cambodia | 136 (86 - 199) | 2.76 (1.77 - 4.03) | 120 (75 - 182) | 1.26 (0.79 - 1.9) | -1.67 (-1.83--1.51) |  |
| Cameroon | 214 (139 - 316) | 4.4 (2.83 - 6.46) | 467 (303 - 691) | 2.9 (1.88 - 4.31) | -0.91 (-1--0.81) |  |
| Canada | 132 (80 - 208) | 0.84 (0.52 - 1.33) | 144 (87 - 219) | 0.83 (0.51 - 1.26) | 0.11 (0.04-0.18) |  |
| Cape Verde | 5 (3 - 8) | 3.35 (2.19 - 4.96) | 5 (3 - 7) | 1.44 (0.93 - 2.16) | -1.9 (-2.04--1.75) |  |
| Central African Republic | 59 (38 - 88) | 4.49 (2.93 - 6.67) | 83 (54 - 121) | 2.97 (1.91 - 4.34) | -1.01 (-1.09--0.94) |  |
| Chad | 147 (95 - 220) | 5.34 (3.49 - 8.01) | 371 (239 - 546) | 4.73 (3.11 - 7) | -0.29 (-0.33--0.25) |  |
| Chile | 275 (171 - 423) | 3.63 (2.26 - 5.53) | 243 (152 - 356) | 2.47 (1.55 - 3.63) | -0.81 (-0.91--0.71) |  |
| China | 18470 (11983 - 27765) | 2.64 (1.7 - 3.93) | 12556 (7972 - 18792) | 1.91 (1.22 - 2.84) | -0.16 (-0.47-0.14) |  |
| Colombia | 396 (250 - 592) | 2.2 (1.4 - 3.23) | 387 (242 - 585) | 1.44 (0.9 - 2.18) | -0.93 (-0.98--0.88) |  |
| Comoros | 10 (6 - 14) | 4.76 (3.08 - 7.07) | 8 (5 - 11) | 1.99 (1.32 - 2.91) | -2.13 (-2.17--2.1) |  |
| Congo | 43 (28 - 64) | 3.79 (2.47 - 5.64) | 57 (37 - 84) | 1.95 (1.26 - 2.87) | -1.42 (-1.57--1.26) |  |
| Cook Islands | 0 (0 - 0) | 2.4 (1.53 - 3.59) | 0 (0 - 0) | 1.25 (0.79 - 1.88) | -1.51 (-1.58--1.44) |  |
| Costa Rica | 36 (23 - 55) | 2.2 (1.38 - 3.29) | 30 (19 - 46) | 1.13 (0.71 - 1.69) | -1.22 (-1.37--1.07) |  |
| Cote d'Ivoire | 266 (174 - 402) | 4.87 (3.22 - 7.27) | 439 (284 - 646) | 3.26 (2.12 - 4.8) | -0.99 (-1.01--0.96) |  |
| Croatia | 28 (17 - 41) | 1.18 (0.75 - 1.77) | 19 (12 - 28) | 1.06 (0.67 - 1.59) | -0.13 (-0.26-0) |  |
| Cuba | 39 (25 - 59) | 0.6 (0.38 - 0.9) | 27 (17 - 41) | 0.56 (0.36 - 0.85) | 0.1 (0.03-0.17) |  |
| Cyprus | 6 (4 - 9) | 1.49 (0.96 - 2.3) | 8 (4 - 11) | 0.92 (0.56 - 1.38) | -0.77 (-0.89--0.64) |  |
| Czech Republic | 85 (52 - 128) | 1.9 (1.15 - 2.84) | 76 (48 - 114) | 1.79 (1.13 - 2.64) | 0.5 (0.23-0.78) |  |
| Democratic Republic of the Congo | 855 (559 - 1276) | 5.02 (3.31 - 7.44) | 1289 (858 - 1903) | 3.07 (2.01 - 4.5) | -1.11 (-1.26--0.96) |  |
| Denmark | 54 (34 - 83) | 2.13 (1.34 - 3.3) | 59 (36 - 88) | 2.34 (1.43 - 3.5) | 0.13 (0.08-0.17) |  |
| Djibouti | 8 (5 - 12) | 4.39 (2.8 - 6.45) | 17 (11 - 25) | 2.52 (1.63 - 3.66) | -1.38 (-1.46--1.31) |  |
| Dominica | 1 (0 - 1) | 1.66 (1.04 - 2.41) | 0 (0 - 0) | 0.71 (0.46 - 1.04) | -1.54 (-1.67--1.41) |  |
| Dominican Republic | 56 (36 - 84) | 1.39 (0.88 - 2.07) | 56 (35 - 85) | 0.93 (0.59 - 1.42) | -0.8 (-0.86--0.74) |  |
| Ecuador | 143 (90 - 211) | 2.8 (1.77 - 4.1) | 214 (138 - 314) | 2.23 (1.44 - 3.27) | -0.33 (-0.44--0.23) |  |
| Egypt | 682 (433 - 1015) | 2.58 (1.66 - 3.86) | 754 (475 - 1154) | 1.4 (0.88 - 2.15) | -1.09 (-1.51--0.66) |  |
| El Salvador | 71 (45 - 104) | 2.69 (1.7 - 3.94) | 48 (31 - 72) | 1.33 (0.85 - 2) | -1.55 (-1.71--1.4) |  |
| Equatorial Guinea | 10 (6 - 14) | 4.73 (2.98 - 6.98) | 15 (10 - 22) | 1.94 (1.28 - 2.89) | -2.25 (-2.36--2.13) |  |
| Eritrea | 72 (47 - 106) | 4.7 (3.09 - 6.91) | 94 (61 - 137) | 2.84 (1.85 - 4.12) | -1.34 (-1.42--1.26) |  |
| Estonia | 22 (14 - 32) | 2.99 (1.89 - 4.42) | 19 (12 - 29) | 3.16 (1.96 - 4.77) | 0.85 (0.59-1.11) |  |
| Ethiopia | 1214 (788 - 1785) | 5.37 (3.54 - 7.71) | 1812 (1170 - 2671) | 3.36 (2.18 - 4.94) | -1.42 (-1.49--1.34) |  |
| Federated States of Micronesia | 2 (1 - 3) | 4.23 (2.72 - 6.38) | 1 (1 - 2) | 2.21 (1.41 - 3.37) | -1.52 (-1.57--1.47) |  |
| Fiji | 9 (6 - 14) | 2.27 (1.47 - 3.42) | 10 (6 - 15) | 2.15 (1.37 - 3.24) | -0.05 (-0.12-0.03) |  |
| Finland | 44 (27 - 65) | 1.74 (1.07 - 2.6) | 34 (21 - 50) | 1.43 (0.89 - 2.16) | -0.34 (-0.45--0.24) |  |
| France | 478 (300 - 725) | 1.62 (1.02 - 2.47) | 491 (309 - 758) | 1.78 (1.12 - 2.74) | 0.31 (0.21-0.41) |  |
| Gabon | 17 (11 - 25) | 3.72 (2.39 - 5.52) | 19 (12 - 29) | 1.89 (1.22 - 2.84) | -1.47 (-1.58--1.37) |  |
| Georgia | 43 (27 - 65) | 1.51 (0.94 - 2.27) | 27 (17 - 39) | 1.7 (1.08 - 2.5) | 0.7 (0.52-0.89) |  |
| Germany | 254 (153 - 394) | 0.61 (0.37 - 0.94) | 250 (162 - 347) | 0.69 (0.45 - 0.96) | 0.31 (0.24-0.37) |  |
| Ghana | 283 (184 - 419) | 4.03 (2.64 - 5.96) | 445 (286 - 654) | 2.4 (1.56 - 3.53) | -1.32 (-1.36--1.28) |  |
| Greece | 65 (41 - 98) | 1.3 (0.83 - 1.95) | 63 (40 - 91) | 1.46 (0.94 - 2.15) | 0.4 (0.3-0.49) |  |
| Greenland | 0 (0 - 1) | 1.13 (0.71 - 1.69) | 0 (0 - 0) | 0.96 (0.61 - 1.45) | -0.36 (-0.41--0.32) |  |
| Grenada | 1 (0 - 1) | 1.36 (0.85 - 2.03) | 0 (0 - 1) | 0.73 (0.46 - 1.1) | -1 (-1.01--0.99) |  |
| Guam | 2 (1 - 3) | 2.37 (1.51 - 3.55) | 2 (1 - 2) | 2.19 (1.42 - 3.34) | -0.15 (-0.28--0.02) |  |
| Guatemala | 168 (107 - 252) | 4.76 (3.04 - 7.08) | 172 (110 - 253) | 1.93 (1.24 - 2.85) | -2.25 (-2.32--2.17) |  |
| Guinea | 136 (89 - 202) | 4.91 (3.16 - 7.2) | 222 (146 - 328) | 3.32 (2.19 - 4.87) | -1.06 (-1.1--1.03) |  |
| Guinea-Bissau | 23 (15 - 34) | 5 (3.28 - 7.31) | 35 (23 - 52) | 3.42 (2.24 - 5.01) | -0.99 (-1.05--0.94) |  |
| Guyana | 6 (4 - 9) | 1.38 (0.87 - 2.09) | 4 (2 - 5) | 0.87 (0.54 - 1.32) | -0.8 (-0.82--0.78) |  |
| Haiti | 80 (51 - 117) | 2.68 (1.74 - 3.93) | 110 (70 - 161) | 1.52 (0.97 - 2.22) | -1.23 (-1.27--1.19) |  |
| Honduras | 88 (56 - 128) | 4.28 (2.76 - 6.27) | 101 (64 - 150) | 1.75 (1.1 - 2.59) | -2.17 (-2.29--2.05) |  |
| Hungary | 60 (37 - 89) | 1.33 (0.81 - 1.98) | 44 (28 - 66) | 1.13 (0.71 - 1.68) | -0.06 (-0.23-0.11) |  |
| Iceland | 3 (2 - 4) | 2.03 (1.29 - 3.05) | 3 (2 - 4) | 1.72 (1.06 - 2.63) | -0.33 (-0.41--0.25) |  |
| India | 14340 (9402 - 21342) | 3.41 (2.22 - 5.02) | 11859 (7580 - 17748) | 1.52 (0.97 - 2.27) | -1.86 (-1.9--1.82) |  |
| Indonesia | 815 (523 - 1242) | 0.83 (0.54 - 1.26) | 824 (525 - 1251) | 0.54 (0.34 - 0.82) | -0.48 (-0.53--0.44) |  |
| Iran | 280 (183 - 421) | 1.14 (0.75 - 1.69) | 235 (153 - 353) | 0.47 (0.3 - 0.72) | -0.8 (-1.02--0.58) |  |
| Iraq | 263 (171 - 387) | 3.36 (2.19 - 4.91) | 311 (196 - 470) | 1.48 (0.93 - 2.24) | -1.79 (-1.83--1.74) |  |
| Ireland | 37 (23 - 55) | 2.1 (1.32 - 3.12) | 43 (26 - 65) | 1.83 (1.12 - 2.77) | -0.13 (-0.21--0.04) |  |
| Israel | 66 (42 - 100) | 2.7 (1.69 - 4.09) | 130 (81 - 192) | 2.98 (1.86 - 4.41) | 0.23 (0.19-0.28) |  |
| Italy | 228 (134 - 387) | 0.8 (0.47 - 1.35) | 241 (152 - 355) | 1.03 (0.65 - 1.54) | 0.46 (0.28-0.65) |  |
| Jamaica | 14 (8 - 20) | 1.09 (0.68 - 1.62) | 9 (6 - 14) | 0.59 (0.37 - 0.88) | -0.97 (-1--0.95) |  |
| Japan | 337 (203 - 531) | 0.6 (0.36 - 0.96) | 259 (162 - 396) | 0.56 (0.35 - 0.86) | -0.01 (-0.07-0.04) |  |
| Jordan | 58 (37 - 85) | 3.81 (2.4 - 5.68) | 104 (65 - 157) | 1.72 (1.08 - 2.6) | -1.65 (-1.72--1.58) |  |
| Kazakhstan | 187 (121 - 284) | 2.12 (1.38 - 3.18) | 203 (128 - 305) | 2.09 (1.32 - 3.13) | 0.78 (0.47-1.08) |  |
| Kenya | 483 (318 - 710) | 4.56 (3.02 - 6.65) | 646 (421 - 956) | 2.35 (1.53 - 3.44) | -1.53 (-1.57--1.49) |  |
| Kiribati | 1 (1 - 2) | 3.88 (2.45 - 5.87) | 2 (1 - 3) | 2.6 (1.65 - 3.91) | -0.96 (-0.98--0.94) |  |
| Kuwait | 12 (8 - 18) | 1.34 (0.87 - 1.97) | 21 (13 - 31) | 0.61 (0.39 - 0.89) | -1.52 (-1.73--1.31) |  |
| Kyrgyzstan | 69 (44 - 103) | 3.03 (1.95 - 4.48) | 79 (51 - 117) | 2.19 (1.43 - 3.21) | -0.05 (-0.31-0.22) |  |
| Laos | 50 (33 - 74) | 2.71 (1.76 - 3.96) | 47 (29 - 71) | 1.13 (0.71 - 1.69) | -2.14 (-2.26--2.01) |  |
| Latvia | 39 (24 - 57) | 3.06 (1.88 - 4.49) | 26 (16 - 39) | 3.22 (2.03 - 4.83) | 0.91 (0.54-1.28) |  |
| Lebanon | 29 (18 - 43) | 1.9 (1.19 - 2.73) | 27 (17 - 40) | 0.83 (0.52 - 1.25) | -1.51 (-1.58--1.44) |  |
| Lesotho | 18 (11 - 26) | 2.34 (1.48 - 3.41) | 12 (8 - 18) | 1.15 (0.74 - 1.69) | -1.42 (-1.43--1.41) |  |
| Liberia | 56 (37 - 83) | 5.07 (3.35 - 7.56) | 79 (51 - 118) | 2.89 (1.87 - 4.27) | -1.45 (-1.53--1.36) |  |
| Libya | 44 (28 - 64) | 2.61 (1.67 - 3.85) | 32 (20 - 48) | 0.78 (0.48 - 1.16) | -2.13 (-2.26--2) |  |
| Lithuania | 56 (34 - 83) | 2.99 (1.85 - 4.44) | 33 (21 - 51) | 2.86 (1.78 - 4.33) | 0.55 (0.19-0.9) |  |
| Luxembourg | 3 (2 - 5) | 1.63 (1.01 - 2.49) | 5 (3 - 8) | 1.53 (0.94 - 2.34) | -0.23 (-0.28--0.18) |  |
| Macedonia | 16 (10 - 24) | 1.54 (0.96 - 2.3) | 10 (6 - 16) | 1 (0.62 - 1.48) | -0.82 (-0.94--0.71) |  |
| Madagascar | 238 (157 - 347) | 4.33 (2.87 - 6.25) | 360 (232 - 536) | 2.42 (1.58 - 3.61) | -1.44 (-1.55--1.32) |  |
| Malawi | 231 (152 - 344) | 5.12 (3.38 - 7.45) | 267 (174 - 397) | 2.69 (1.72 - 3.98) | -1.7 (-1.83--1.57) |  |
| Malaysia | 164 (103 - 246) | 1.79 (1.13 - 2.69) | 189 (115 - 285) | 1.06 (0.65 - 1.6) | -1.1 (-1.19--1) |  |
| Maldives | 3 (2 - 4) | 2.97 (1.86 - 4.38) | 3 (2 - 4) | 1 (0.61 - 1.51) | -1.94 (-2.25--1.64) |  |
| Mali | 217 (144 - 324) | 5.58 (3.73 - 8.23) | 491 (325 - 728) | 4.52 (2.95 - 6.7) | -0.57 (-0.6--0.54) |  |
| Malta | 2 (1 - 2) | 0.87 (0.54 - 1.34) | 1 (1 - 2) | 0.65 (0.41 - 0.99) | -0.38 (-0.58--0.18) |  |
| Marshall Islands | 1 (0 - 1) | 3.61 (2.32 - 5.48) | 1 (0 - 1) | 2.15 (1.36 - 3.21) | -1.14 (-1.18--1.1) |  |
| Mauritania | 42 (27 - 62) | 4.58 (3.02 - 6.69) | 56 (36 - 83) | 2.69 (1.77 - 3.98) | -1.15 (-1.23--1.07) |  |
| Mauritius | 6 (4 - 10) | 0.97 (0.61 - 1.46) | 4 (2 - 6) | 0.62 (0.39 - 0.94) | -0.71 (-0.76--0.65) |  |
| Mexico | 1008 (625 - 1559) | 2.31 (1.45 - 3.57) | 1174 (761 - 1717) | 1.68 (1.09 - 2.46) | -1.07 (-1.26--0.88) |  |
| Moldova | 78 (48 - 118) | 3.43 (2.12 - 5.09) | 36 (22 - 54) | 2.09 (1.28 - 3.07) | -0.69 (-1.03--0.34) |  |
| Monaco | 0 (0 - 0) | 1.5 (0.93 - 2.29) | 0 (0 - 0) | 1.54 (0.96 - 2.33) | 0.02 (0.01-0.04) |  |
| Mongolia | 39 (25 - 60) | 3.68 (2.39 - 5.54) | 45 (29 - 68) | 2.62 (1.65 - 3.92) | -0.06 (-0.51-0.39) |  |
| Montenegro | 4 (3 - 7) | 1.38 (0.87 - 2.08) | 3 (2 - 5) | 1.22 (0.77 - 1.85) | -0.2 (-0.23--0.17) |  |
| Morocco | 298 (195 - 436) | 2.44 (1.62 - 3.6) | 221 (140 - 329) | 1.12 (0.71 - 1.66) | -1.52 (-1.58--1.46) |  |
| Mozambique | 288 (187 - 427) | 4.51 (2.93 - 6.69) | 472 (312 - 698) | 3.07 (2.02 - 4.52) | -0.93 (-1.04--0.82) |  |
| Myanmar | 361 (229 - 533) | 1.77 (1.14 - 2.62) | 314 (195 - 468) | 1.05 (0.65 - 1.56) | -0.87 (-0.92--0.83) |  |
| Namibia | 17 (11 - 25) | 2.46 (1.63 - 3.59) | 18 (11 - 27) | 1.33 (0.84 - 1.95) | -1.1 (-1.17--1.03) |  |
| Nauru | 0 (0 - 0) | 4.06 (2.56 - 6.04) | 0 (0 - 0) | 2.62 (1.66 - 3.9) | -1.1 (-1.12--1.08) |  |
| Nepal | 435 (277 - 634) | 4.61 (2.94 - 6.8) | 298 (189 - 448) | 1.52 (0.96 - 2.3) | -2.91 (-3.15--2.66) |  |
| Netherlands | 130 (80 - 198) | 1.59 (0.98 - 2.41) | 121 (74 - 179) | 1.64 (1.01 - 2.43) | 0.16 (0.08-0.24) |  |
| New Zealand | 43 (25 - 68) | 2.29 (1.37 - 3.62) | 61 (38 - 92) | 2.46 (1.54 - 3.67) | -0.29 (-0.45--0.13) |  |
| Nicaragua | 61 (38 - 89) | 3.29 (2.08 - 4.81) | 58 (37 - 88) | 1.55 (0.98 - 2.34) | -1.51 (-1.69--1.33) |  |
| Niger | 206 (136 - 305) | 5.85 (3.88 - 8.64) | 554 (368 - 813) | 5.27 (3.46 - 7.68) | -0.32 (-0.36--0.29) |  |
| Nigeria | 2101 (1387 - 3080) | 5.28 (3.51 - 7.68) | 3855 (2521 - 5702) | 3.43 (2.24 - 5.06) | -1.02 (-1.12--0.92) |  |
| Niue | 0 (0 - 0) | 2.6 (1.65 - 3.88) | 0 (0 - 0) | 1.75 (1.1 - 2.64) | -0.76 (-0.8--0.71) |  |
| North Korea | 375 (233 - 579) | 3.28 (2.05 - 5.03) | 214 (129 - 332) | 1.6 (0.97 - 2.48) | -1.66 (-1.74--1.58) |  |
| Northern Mariana Islands | 1 (0 - 1) | 2.12 (1.37 - 3.23) | 0 (0 - 1) | 1.62 (1.03 - 2.44) | -0.55 (-0.56--0.53) |  |
| Norway | 31 (18 - 51) | 1.48 (0.85 - 2.45) | 33 (19 - 56) | 1.31 (0.76 - 2.22) | -0.16 (-0.27--0.04) |  |
| Oman | 21 (13 - 31) | 3.14 (2.02 - 4.71) | 26 (16 - 40) | 1.13 (0.71 - 1.68) | -2.05 (-2.13--1.97) |  |
| Pakistan | 2814 (1849 - 4121) | 6.15 (4 - 8.99) | 3945 (2550 - 5828) | 3.15 (2.04 - 4.62) | -1.85 (-1.88--1.81) |  |
| Palau | 0 (0 - 0) | 2.04 (1.31 - 3.03) | 0 (0 - 0) | 1.66 (1.07 - 2.51) | -0.33 (-0.38--0.29) |  |
| Palestine | 30 (18 - 43) | 3.4 (2.14 - 5.06) | 36 (23 - 54) | 1.34 (0.84 - 1.96) | -2.19 (-2.34--2.03) |  |
| Panama | 25 (16 - 37) | 1.98 (1.27 - 2.95) | 34 (22 - 53) | 1.61 (1.02 - 2.46) | -0.31 (-0.38--0.24) |  |
| Papua New Guinea | 83 (54 - 125) | 4.45 (2.9 - 6.68) | 171 (110 - 255) | 3.23 (2.08 - 4.78) | -0.86 (-0.93--0.79) |  |
| Paraguay | 10 (6 - 14) | 0.53 (0.33 - 0.78) | 11 (7 - 17) | 0.29 (0.18 - 0.43) | -0.5 (-0.54--0.47) |  |
| Peru | 344 (219 - 501) | 3.22 (2.04 - 4.71) | 385 (242 - 576) | 1.93 (1.22 - 2.89) | -1.12 (-1.21--1.03) |  |
| Philippines | 1233 (795 - 1825) | 4.04 (2.59 - 5.99) | 1432 (919 - 2122) | 2.4 (1.54 - 3.54) | -1.19 (-1.28--1.1) |  |
| Poland | 96 (59 - 147) | 0.54 (0.33 - 0.83) | 63 (40 - 91) | 0.37 (0.23 - 0.53) | -0.26 (-0.37--0.15) |  |
| Portugal | 43 (27 - 66) | 0.86 (0.53 - 1.32) | 36 (23 - 54) | 0.82 (0.53 - 1.21) | -0.11 (-0.17--0.05) |  |
| Puerto Rico | 15 (10 - 23) | 0.8 (0.5 - 1.22) | 5 (3 - 8) | 0.35 (0.22 - 0.53) | -1 (-1.06--0.93) |  |
| Qatar | 5 (3 - 8) | 2.88 (1.85 - 4.25) | 17 (10 - 26) | 1.22 (0.77 - 1.87) | -1.77 (-1.79--1.75) |  |
| Romania | 174 (106 - 258) | 1.56 (0.95 - 2.34) | 111 (71 - 163) | 1.56 (1.01 - 2.29) | 0.43 (0.21-0.65) |  |
| Russian Federation | 2251 (1433 - 3332) | 3.05 (1.95 - 4.43) | 2299 (1468 - 3459) | 3.39 (2.14 - 5.04) | 1.16 (0.8-1.52) |  |
| Rwanda | 147 (95 - 220) | 4.84 (3.14 - 7.14) | 153 (98 - 226) | 2.19 (1.41 - 3.25) | -2.3 (-2.45--2.16) |  |
| Saint Kitts and Nevis | 0 (0 - 0) | 1.05 (0.66 - 1.59) | 0 (0 - 0) | 0.5 (0.31 - 0.74) | -1.09 (-1.15--1.04) |  |
| Saint Lucia | 1 (1 - 1) | 1.25 (0.8 - 1.86) | 0 (0 - 1) | 0.55 (0.35 - 0.82) | -1.24 (-1.35--1.13) |  |
| Saint Vincent and the Grenadines | 1 (0 - 1) | 1.17 (0.73 - 1.74) | 0 (0 - 1) | 0.75 (0.47 - 1.11) | -0.59 (-0.67--0.52) |  |
| Samoa | 2 (1 - 3) | 2.49 (1.59 - 3.76) | 3 (2 - 4) | 2.94 (1.83 - 4.47) | 0.77 (0.62-0.91) |  |
| San Marino | 0 (0 - 0) | 1.31 (0.82 - 2.01) | 0 (0 - 0) | 1.44 (0.88 - 2.16) | 0.21 (0.19-0.24) |  |
| Sao Tome and Principe | 2 (1 - 3) | 4.17 (2.73 - 6.13) | 2 (1 - 3) | 1.68 (1.11 - 2.51) | -2.15 (-2.35--1.96) |  |
| Saudi Arabia | 202 (129 - 303) | 3.36 (2.12 - 4.96) | 172 (108 - 259) | 0.75 (0.47 - 1.12) | -3.12 (-3.26--2.99) |  |
| Senegal | 172 (112 - 254) | 5.12 (3.32 - 7.46) | 208 (135 - 307) | 2.71 (1.76 - 4.01) | -1.41 (-1.49--1.33) |  |
| Serbia | 55 (35 - 82) | 1.2 (0.76 - 1.8) | 35 (22 - 52) | 0.88 (0.56 - 1.34) | -0.47 (-0.63--0.31) |  |
| Seychelles | 0 (0 - 1) | 1.14 (0.72 - 1.7) | 0 (0 - 1) | 1 (0.63 - 1.49) | -0.01 (-0.15-0.12) |  |
| Sierra Leone | 93 (60 - 137) | 4.52 (2.92 - 6.6) | 136 (88 - 201) | 2.96 (1.93 - 4.28) | -1.16 (-1.26--1.05) |  |
| Singapore | 14 (9 - 22) | 0.67 (0.43 - 1.05) | 14 (9 - 22) | 0.45 (0.28 - 0.69) | -0.49 (-0.56--0.43) |  |
| Slovakia | 44 (27 - 66) | 1.74 (1.07 - 2.63) | 32 (20 - 49) | 1.32 (0.85 - 2.01) | -0.12 (-0.45-0.2) |  |
| Slovenia | 12 (7 - 17) | 1.18 (0.72 - 1.76) | 11 (7 - 16) | 1.35 (0.83 - 2.03) | 0.55 (0.42-0.68) |  |
| Solomon Islands | 8 (5 - 12) | 5.92 (3.8 - 8.75) | 12 (8 - 18) | 3.43 (2.23 - 5.16) | -1.49 (-1.53--1.45) |  |
| Somalia | 181 (119 - 272) | 5.33 (3.5 - 7.95) | 401 (260 - 594) | 4.25 (2.78 - 6.27) | -0.61 (-0.66--0.56) |  |
| South Africa | 141 (90 - 213) | 0.7 (0.46 - 1.05) | 131 (84 - 196) | 0.41 (0.26 - 0.62) | -0.75 (-0.84--0.67) |  |
| South Korea | 166 (102 - 263) | 0.59 (0.36 - 0.93) | 84 (52 - 127) | 0.36 (0.23 - 0.56) | -0.72 (-0.79--0.64) |  |
| South Sudan | 129 (83 - 191) | 5 (3.2 - 7.37) | 209 (139 - 307) | 4.57 (3.02 - 6.64) | -0.29 (-0.32--0.26) |  |
| Spain | 285 (174 - 441) | 1.47 (0.9 - 2.26) | 280 (178 - 421) | 1.44 (0.92 - 2.16) | 0.19 (0.11-0.28) |  |
| Sri Lanka | 108 (67 - 165) | 1.14 (0.71 - 1.73) | 104 (65 - 159) | 0.93 (0.58 - 1.44) | -0.19 (-0.28--0.1) |  |
| Sudan | 324 (206 - 472) | 3.5 (2.29 - 5.14) | 344 (221 - 513) | 1.5 (0.96 - 2.23) | -1.91 (-2.03--1.79) |  |
| Suriname | 2 (2 - 4) | 1.19 (0.76 - 1.8) | 2 (2 - 4) | 0.85 (0.52 - 1.26) | -0.46 (-0.49--0.42) |  |
| Swaziland | 10 (7 - 15) | 2.59 (1.65 - 3.74) | 9 (6 - 13) | 1.35 (0.86 - 1.96) | -1.36 (-1.36--1.35) |  |
| Sweden | 138 (87 - 209) | 3.5 (2.19 - 5.27) | 129 (79 - 194) | 2.76 (1.7 - 4.17) | -0.22 (-0.43--0.02) |  |
| Switzerland | 63 (39 - 95) | 1.71 (1.07 - 2.58) | 72 (44 - 108) | 1.69 (1.04 - 2.56) | 0.05 (-0.06-0.16) |  |
| Syria | 144 (92 - 212) | 2.72 (1.76 - 4) | 66 (43 - 99) | 0.99 (0.63 - 1.46) | -1.9 (-1.97--1.83) |  |
| Taiwan | 218 (132 - 340) | 1.77 (1.08 - 2.75) | 181 (110 - 274) | 1.54 (0.95 - 2.33) | -0.35 (-0.59--0.12) |  |
| Tajikistan | 104 (68 - 154) | 4.12 (2.71 - 6.06) | 122 (78 - 181) | 2.25 (1.43 - 3.31) | -1.34 (-1.41--1.28) |  |
| Tanzania | 558 (363 - 832) | 4.7 (3.05 - 6.92) | 887 (569 - 1309) | 2.97 (1.93 - 4.38) | -1.07 (-1.14--1) |  |
| Thailand | 286 (179 - 432) | 0.85 (0.53 - 1.27) | 175 (111 - 264) | 0.58 (0.36 - 0.87) | -0.43 (-0.48--0.37) |  |
| The Bahamas | 1 (1 - 2) | 0.86 (0.55 - 1.31) | 1 (1 - 2) | 0.56 (0.36 - 0.83) | -0.3 (-0.41--0.19) |  |
| The Gambia | 21 (14 - 32) | 4.64 (3.07 - 6.78) | 38 (24 - 55) | 3.16 (2.04 - 4.56) | -1.01 (-1.09--0.93) |  |
| Timor-Leste | 12 (8 - 18) | 3.27 (2.07 - 4.9) | 12 (8 - 18) | 1.89 (1.19 - 2.81) | -1.42 (-1.57--1.27) |  |
| Togo | 77 (49 - 115) | 4.64 (3.01 - 6.83) | 114 (74 - 167) | 2.68 (1.73 - 3.88) | -1.26 (-1.34--1.18) |  |
| Tokelau | 0 (0 - 0) | 3.1 (1.95 - 4.64) | 0 (0 - 0) | 2.17 (1.39 - 3.29) | -0.79 (-0.8--0.78) |  |
| Tonga | 2 (1 - 3) | 5.43 (3.36 - 8.16) | 2 (1 - 2) | 3.13 (1.98 - 4.78) | -1.39 (-1.43--1.36) |  |
| Trinidad and Tobago | 6 (4 - 9) | 0.95 (0.6 - 1.43) | 4 (3 - 7) | 0.64 (0.4 - 0.95) | -0.29 (-0.39--0.18) |  |
| Tunisia | 73 (47 - 111) | 1.81 (1.16 - 2.72) | 50 (31 - 75) | 0.75 (0.46 - 1.12) | -1.38 (-1.46--1.29) |  |
| Turkey | 628 (398 - 952) | 2.09 (1.33 - 3.18) | 508 (318 - 780) | 1.17 (0.74 - 1.79) | -1.15 (-1.26--1.04) |  |
| Turkmenistan | 67 (42 - 100) | 3.57 (2.29 - 5.31) | 55 (35 - 82) | 2.13 (1.34 - 3.19) | -1.09 (-1.31--0.88) |  |
| Tuvalu | 0 (0 - 0) | 5 (3.23 - 7.59) | 0 (0 - 0) | 2.66 (1.71 - 4.01) | -1.58 (-1.69--1.46) |  |
| Uganda | 414 (268 - 612) | 5.26 (3.41 - 7.79) | 649 (427 - 953) | 3.08 (2.05 - 4.48) | -1.42 (-1.55--1.29) |  |
| Ukraine | 708 (446 - 1047) | 2.9 (1.83 - 4.28) | 456 (290 - 679) | 2.34 (1.49 - 3.44) | 0.25 (-0.08-0.59) |  |
| United Arab Emirates | 16 (11 - 24) | 2.19 (1.4 - 3.21) | 31 (19 - 47) | 0.75 (0.47 - 1.11) | -1.93 (-2.15--1.72) |  |
| United Kingdom | 525 (337 - 785) | 1.83 (1.18 - 2.72) | 575 (357 - 849) | 1.8 (1.13 - 2.7) | 0.18 (0.07-0.29) |  |
| United States | 1349 (822 - 2130) | 0.97 (0.59 - 1.52) | 962 (614 - 1409) | 0.62 (0.4 - 0.92) | -1.05 (-1.23--0.86) |  |
| Uruguay | 51 (32 - 76) | 3.39 (2.13 - 5.06) | 45 (29 - 68) | 2.71 (1.75 - 4.08) | -0.6 (-0.72--0.48) |  |
| Uzbekistan | 358 (232 - 538) | 3.3 (2.12 - 4.94) | 357 (224 - 544) | 1.96 (1.24 - 3) | -1.15 (-1.23--1.06) |  |
| Vanuatu | 4 (2 - 6) | 5.21 (3.36 - 7.96) | 5 (3 - 7) | 3.03 (1.91 - 4.54) | -1.44 (-1.5--1.37) |  |
| Venezuela | 250 (156 - 362) | 2.49 (1.57 - 3.62) | 227 (145 - 333) | 1.7 (1.08 - 2.49) | -0.64 (-0.77--0.51) |  |
| Vietnam | 502 (310 - 762) | 1.38 (0.86 - 2.05) | 379 (239 - 583) | 0.72 (0.45 - 1.1) | -0.94 (-1.04--0.85) |  |
| Virgin Islands, U.S. | 1 (0 - 1) | 1.09 (0.69 - 1.65) | 0 (0 - 0) | 0.67 (0.42 - 1.01) | 0.7 (0.4-1) |  |
| Yemen | 223 (144 - 327) | 4.16 (2.69 - 6.11) | 342 (216 - 505) | 2.04 (1.31 - 3.03) | -1.78 (-1.85--1.7) |  |
| Zambia | 175 (114 - 260) | 4.78 (3.16 - 7.05) | 268 (175 - 405) | 2.67 (1.78 - 3.97) | -1.37 (-1.52--1.22) |  |
| Zimbabwe | 122 (78 - 176) | 2.49 (1.61 - 3.58) | 147 (94 - 214) | 1.72 (1.11 - 2.51) | -0.59 (-0.66--0.51) |  |

CI: confidence interval, EAPC: estimated annual percent change, EP: ectopic pregnancy, UI: uncertainty interval

**Table S3.** **Mortality of EP in 1990 and 2021 for female with EAPC from 1990 and 2021 in countries or territories**

| **Location** | **1990** | | **2021** | | **EAPC % (95% CI) 1990–2021** |
| --- | --- | --- | --- | --- | --- |
| **Cases (95% UI)** | **Age‑standardized mortality per 100 000 population (95% UI)** | **Cases (95% UI)** | **Age‑standardized mortality per 100 000 population (95% UI)** |
|  |
| Afghanistan | 8 (5 - 11) | 0.18 (0.12 - 0.28) | 25 (15 - 37) | 0.18 (0.1 - 0.27) | 0.01 (-0.04-0.06) |  |
| Albania | 0 (0 - 0) | 0.01 (0 - 0.01) | 0 (0 - 0) | 0 (0 - 0) | -0.01 (-0.01--0.01) |  |
| Algeria | 6 (4 - 8) | 0.05 (0.03 - 0.07) | 4 (2 - 6) | 0.02 (0.01 - 0.02) | -0.11 (-0.11--0.11) |  |
| American Samoa | 0 (0 - 0) | 0.11 (0.06 - 0.18) | 0 (0 - 0) | 0.15 (0.09 - 0.24) | 0.33 (0.24-0.42) |  |
| Andorra | 0 (0 - 0) | 0.01 (0 - 0.01) | 0 (0 - 0) | 0 (0 - 0) | -0.01 (-0.01--0.01) |  |
| Angola | 73 (49 - 102) | 1.6 (1.08 - 2.24) | 269 (165 - 412) | 1.8 (1.1 - 2.79) | 0.34 (0.15-0.53) |  |
| Antigua and Barbuda | 0 (0 - 0) | 0.02 (0.01 - 0.02) | 0 (0 - 0) | 0.07 (0.05 - 0.08) | 0.22 (0.17-0.27) |  |
| Argentina | 2 (1 - 2) | 0.01 (0.01 - 0.01) | 3 (2 - 4) | 0.01 (0.01 - 0.02) | 0.01 (-0.01-0.02) |  |
| Armenia | 0 (0 - 0) | 0.01 (0 - 0.01) | 0 (0 - 0) | 0 (0 - 0) | -0.01 (-0.01--0.01) |  |
| Australia | 1 (1 - 2) | 0.01 (0.01 - 0.02) | 0 (0 - 0) | 0 (0 - 0) | -0.03 (-0.04--0.03) |  |
| Austria | 0 (0 - 0) | 0.01 (0.01 - 0.01) | 0 (0 - 0) | 0 (0 - 0) | -0.02 (-0.02--0.02) |  |
| Azerbaijan | 0 (0 - 0) | 0.01 (0 - 0.01) | 0 (0 - 0) | 0 (0 - 0) | -0.02 (-0.02--0.01) |  |
| Bahrain | 0 (0 - 0) | 0.02 (0.01 - 0.03) | 0 (0 - 0) | 0.01 (0.01 - 0.02) | -0.02 (-0.03--0.01) |  |
| Bangladesh | 44 (34 - 57) | 0.08 (0.06 - 0.11) | 97 (64 - 133) | 0.1 (0.07 - 0.14) | 0.11 (0.1-0.13) |  |
| Barbados | 0 (0 - 0) | 0.03 (0.03 - 0.04) | 0 (0 - 0) | 0.13 (0.09 - 0.18) | 0.44 (0.34-0.54) |  |
| Belarus | 2 (2 - 3) | 0.04 (0.03 - 0.05) | 0 (0 - 0) | 0.01 (0 - 0.01) | -0.08 (-0.09--0.07) |  |
| Belgium | 0 (0 - 0) | 0.01 (0 - 0.01) | 0 (0 - 0) | 0 (0 - 0) | -0.01 (-0.02--0.01) |  |
| Belize | 0 (0 - 0) | 0.01 (0.01 - 0.02) | 0 (0 - 0) | 0.06 (0.04 - 0.07) | 0.21 (0.17-0.25) |  |
| Benin | 53 (41 - 69) | 2.41 (1.86 - 3.08) | 42 (25 - 61) | 0.59 (0.36 - 0.85) | -2.6 (-2.92--2.28) |  |
| Bermuda | 0 (0 - 0) | 0.02 (0.02 - 0.03) | 0 (0 - 0) | 0 (0 - 0) | -0.05 (-0.06--0.04) |  |
| Bhutan | 0 (0 - 0) | 0.1 (0.06 - 0.14) | 0 (0 - 0) | 0.05 (0.03 - 0.09) | -0.15 (-0.18--0.12) |  |
| Bolivia | 2 (2 - 3) | 0.07 (0.05 - 0.09) | 13 (9 - 18) | 0.2 (0.14 - 0.28) | 0.42 (0.3-0.53) |  |
| Bosnia and Herzegovina | 0 (0 - 0) | 0 (0 - 0.01) | 0 (0 - 0) | 0 (0 - 0) | -0.01 (-0.01--0.01) |  |
| Botswana | 13 (7 - 20) | 1.76 (1 - 2.77) | 5 (3 - 8) | 0.39 (0.24 - 0.57) | -1.74 (-2.02--1.47) |  |
| Brazil | 111 (94 - 134) | 0.14 (0.12 - 0.17) | 38 (31 - 45) | 0.03 (0.03 - 0.04) | -0.21 (-0.26--0.15) |  |
| Brunei | 0 (0 - 1) | 0.28 (0.16 - 0.45) | 0 (0 - 0) | 0.08 (0.04 - 0.12) | -0.43 (-0.5--0.35) |  |
| Bulgaria | 1 (1 - 1) | 0.02 (0.02 - 0.03) | 0 (0 - 0) | 0 (0 - 0.01) | -0.04 (-0.05--0.04) |  |
| Burkina Faso | 78 (52 - 108) | 1.93 (1.3 - 2.67) | 143 (87 - 211) | 1.28 (0.77 - 1.86) | -0.58 (-0.74--0.43) |  |
| Burundi | 46 (31 - 63) | 1.88 (1.24 - 2.58) | 79 (51 - 112) | 1.3 (0.84 - 1.85) | -0.88 (-0.99--0.77) |  |
| Cambodia | 12 (8 - 17) | 0.24 (0.16 - 0.33) | 18 (11 - 29) | 0.19 (0.12 - 0.32) | -0.19 (-0.25--0.14) |  |
| Cameroon | 85 (60 - 113) | 1.61 (1.15 - 2.15) | 90 (54 - 131) | 0.53 (0.32 - 0.76) | -1.49 (-1.62--1.36) |  |
| Canada | 1 (1 - 2) | 0.01 (0.01 - 0.01) | 1 (0 - 1) | 0 (0 - 0) | -0.01 (-0.01--0.01) |  |
| Cape Verde | 1 (1 - 2) | 0.68 (0.42 - 1) | 0 (0 - 1) | 0.16 (0.08 - 0.26) | -1.32 (-1.47--1.17) |  |
| Central African Republic | 23 (18 - 30) | 1.88 (1.39 - 2.4) | 44 (29 - 65) | 1.62 (1.05 - 2.43) | -0.18 (-0.32--0.04) |  |
| Chad | 42 (32 - 56) | 1.59 (1.18 - 2.06) | 166 (116 - 223) | 2.12 (1.48 - 2.85) | 0.72 (0.61-0.83) |  |
| Chile | 2 (2 - 3) | 0.03 (0.02 - 0.03) | 1 (1 - 1) | 0.01 (0.01 - 0.01) | -0.07 (-0.09--0.06) |  |
| China | 231 (162 - 314) | 0.03 (0.02 - 0.05) | 76 (53 - 108) | 0.01 (0.01 - 0.02) | -0.06 (-0.07--0.05) |  |
| Colombia | 23 (18 - 30) | 0.13 (0.1 - 0.16) | 11 (7 - 15) | 0.04 (0.03 - 0.06) | -0.25 (-0.3--0.21) |  |
| Comoros | 2 (1 - 4) | 1.23 (0.62 - 1.92) | 2 (1 - 3) | 0.53 (0.31 - 0.86) | -1.63 (-1.85--1.4) |  |
| Congo | 22 (14 - 32) | 2.03 (1.34 - 3.01) | 44 (27 - 67) | 1.53 (0.91 - 2.33) | -0.52 (-0.99--0.05) |  |
| Cook Islands | 0 (0 - 0) | 0 (0 - 0.01) | 0 (0 - 0) | 0 (0 - 0) | -0.01 (-0.01-0) |  |
| Costa Rica | 0 (0 - 0) | 0.02 (0.02 - 0.03) | 0 (0 - 0) | 0.01 (0 - 0.01) | -0.06 (-0.06--0.06) |  |
| Cote d'Ivoire | 84 (57 - 119) | 1.5 (1.02 - 2.12) | 160 (91 - 250) | 1.16 (0.66 - 1.82) | -0.11 (-0.25-0.04) |  |
| Croatia | 0 (0 - 0) | 0.01 (0.01 - 0.01) | 0 (0 - 0) | 0 (0 - 0) | -0.02 (-0.03--0.02) |  |
| Cuba | 1 (1 - 1) | 0.01 (0.01 - 0.02) | 2 (1 - 2) | 0.03 (0.03 - 0.05) | 0.11 (0.06-0.15) |  |
| Cyprus | 0 (0 - 0) | 0.04 (0.02 - 0.06) | 0 (0 - 0) | 0.01 (0 - 0.01) | -0.12 (-0.13--0.11) |  |
| Czech Republic | 1 (1 - 1) | 0.02 (0.02 - 0.03) | 0 (0 - 0) | 0 (0 - 0) | -0.05 (-0.06--0.04) |  |
| Democratic Republic of the Congo | 282 (195 - 392) | 1.72 (1.2 - 2.36) | 930 (628 - 1302) | 2.3 (1.55 - 3.26) | 1.33 (1.06-1.59) |  |
| Denmark | 0 (0 - 0) | 0.01 (0.01 - 0.02) | 0 (0 - 0) | 0 (0 - 0) | -0.04 (-0.05--0.04) |  |
| Djibouti | 3 (2 - 5) | 1.66 (1.13 - 2.35) | 10 (5 - 15) | 1.45 (0.82 - 2.32) | -0.21 (-0.54-0.13) |  |
| Dominica | 0 (0 - 0) | 0.02 (0.01 - 0.03) | 0 (0 - 0) | 0.22 (0.12 - 0.35) | 0.81 (0.69-0.93) |  |
| Dominican Republic | 1 (1 - 1) | 0.03 (0.02 - 0.04) | 4 (2 - 5) | 0.06 (0.04 - 0.08) | 0.18 (0.13-0.23) |  |
| Ecuador | 1 (0 - 1) | 0.01 (0.01 - 0.01) | 6 (4 - 8) | 0.06 (0.04 - 0.09) | 0.25 (0.19-0.31) |  |
| Egypt | 13 (10 - 18) | 0.05 (0.04 - 0.07) | 11 (7 - 15) | 0.02 (0.01 - 0.03) | -0.04 (-0.06--0.02) |  |
| El Salvador | 3 (2 - 4) | 0.11 (0.09 - 0.13) | 1 (1 - 1) | 0.02 (0.02 - 0.04) | -0.19 (-0.25--0.14) |  |
| Equatorial Guinea | 3 (2 - 4) | 1.53 (1 - 2.13) | 4 (2 - 8) | 0.61 (0.29 - 1.07) | -1.55 (-1.9--1.21) |  |
| Eritrea | 24 (18 - 30) | 1.55 (1.17 - 1.97) | 67 (39 - 98) | 1.98 (1.14 - 2.93) | 0.39 (0.21-0.58) |  |
| Estonia | 1 (1 - 1) | 0.1 (0.08 - 0.13) | 0 (0 - 0) | 0 (0 - 0) | -0.28 (-0.33--0.24) |  |
| Ethiopia | 485 (360 - 639) | 2.42 (1.78 - 3.16) | 429 (289 - 590) | 0.89 (0.6 - 1.21) | -2.53 (-2.77--2.3) |  |
| Federated States of Micronesia | 0 (0 - 0) | 0.12 (0.07 - 0.19) | 0 (0 - 0) | 0.06 (0.03 - 0.11) | -0.09 (-0.13--0.06) |  |
| Fiji | 1 (1 - 2) | 0.37 (0.2 - 0.6) | 1 (0 - 1) | 0.16 (0.08 - 0.26) | -0.6 (-0.64--0.56) |  |
| Finland | 0 (0 - 0) | 0.01 (0 - 0.01) | 0 (0 - 0) | 0 (0 - 0) | -0.01 (-0.01--0.01) |  |
| France | 4 (3 - 4) | 0.01 (0.01 - 0.01) | 1 (0 - 1) | 0 (0 - 0) | -0.04 (-0.04--0.03) |  |
| Gabon | 9 (6 - 12) | 2 (1.37 - 2.82) | 4 (2 - 7) | 0.37 (0.19 - 0.63) | -2.85 (-3.05--2.64) |  |
| Georgia | 0 (0 - 1) | 0.02 (0.01 - 0.02) | 0 (0 - 0) | 0.01 (0.01 - 0.01) | 0 (-0.01-0.01) |  |
| Germany | 2 (2 - 2) | 0 (0 - 0.01) | 0 (0 - 0) | 0 (0 - 0) | -0.01 (-0.01--0.01) |  |
| Ghana | 84 (49 - 125) | 1.14 (0.67 - 1.7) | 81 (54 - 117) | 0.42 (0.28 - 0.61) | -1.18 (-1.27--1.09) |  |
| Greece | 0 (0 - 0) | 0.01 (0.01 - 0.01) | 0 (0 - 0) | 0 (0 - 0) | -0.01 (-0.01--0.01) |  |
| Greenland | 0 (0 - 0) | 0.05 (0.03 - 0.08) | 0 (0 - 0) | 0.01 (0 - 0.01) | -0.16 (-0.18--0.13) |  |
| Grenada | 0 (0 - 0) | 0.03 (0.03 - 0.04) | 0 (0 - 0) | 0.07 (0.05 - 0.09) | 0.19 (0.12-0.25) |  |
| Guam | 0 (0 - 0) | 0.02 (0.01 - 0.03) | 0 (0 - 0) | 0.02 (0.01 - 0.03) | 0.04 (0.02-0.07) |  |
| Guatemala | 9 (7 - 11) | 0.25 (0.2 - 0.3) | 14 (10 - 18) | 0.15 (0.11 - 0.2) | -0.27 (-0.41--0.12) |  |
| Guinea | 55 (39 - 76) | 2.02 (1.43 - 2.72) | 104 (68 - 154) | 1.55 (1.02 - 2.31) | -0.61 (-0.69--0.53) |  |
| Guinea-Bissau | 14 (8 - 20) | 2.78 (1.72 - 4.03) | 19 (11 - 30) | 1.69 (0.96 - 2.71) | -1.08 (-1.19--0.98) |  |
| Guyana | 0 (0 - 0) | 0.06 (0.04 - 0.09) | 2 (1 - 3) | 0.44 (0.29 - 0.67) | 1.25 (1.01-1.48) |  |
| Haiti | 6 (5 - 9) | 0.21 (0.14 - 0.29) | 35 (22 - 55) | 0.48 (0.3 - 0.75) | 0.89 (0.64-1.15) |  |
| Honduras | 1 (1 - 2) | 0.05 (0.04 - 0.07) | 0 (0 - 1) | 0.01 (0 - 0.01) | -0.13 (-0.14--0.11) |  |
| Hungary | 2 (2 - 2) | 0.04 (0.03 - 0.05) | 0 (0 - 0) | 0 (0 - 0.01) | -0.08 (-0.1--0.06) |  |
| Iceland | 0 (0 - 0) | 0 (0 - 0) | 0 (0 - 0) | 0 (0 - 0) | 0 (0-0) |  |
| India | 183 (150 - 221) | 0.04 (0.04 - 0.05) | 229 (176 - 289) | 0.03 (0.02 - 0.04) | -0.06 (-0.07--0.05) |  |
| Indonesia | 216 (166 - 275) | 0.23 (0.17 - 0.29) | 274 (197 - 391) | 0.18 (0.13 - 0.26) | -0.25 (-0.4--0.1) |  |
| Iran | 15 (10 - 20) | 0.06 (0.04 - 0.08) | 4 (3 - 6) | 0.01 (0.01 - 0.01) | -0.13 (-0.15--0.12) |  |
| Iraq | 5 (3 - 7) | 0.06 (0.04 - 0.1) | 7 (4 - 11) | 0.03 (0.02 - 0.06) | -0.1 (-0.12--0.07) |  |
| Ireland | 0 (0 - 0) | 0.02 (0.01 - 0.02) | 0 (0 - 0) | 0 (0 - 0) | -0.03 (-0.03--0.02) |  |
| Israel | 0 (0 - 0) | 0.01 (0.01 - 0.01) | 0 (0 - 0) | 0 (0 - 0) | -0.02 (-0.03--0.02) |  |
| Italy | 2 (1 - 2) | 0.01 (0.01 - 0.01) | 0 (0 - 0) | 0 (0 - 0) | -0.01 (-0.01--0.01) |  |
| Jamaica | 0 (0 - 0) | 0 (0 - 0) | 1 (1 - 2) | 0.07 (0.05 - 0.11) | 0.26 (0.17-0.34) |  |
| Japan | 6 (5 - 8) | 0.01 (0.01 - 0.01) | 1 (1 - 1) | 0 (0 - 0) | -0.02 (-0.03--0.02) |  |
| Jordan | 2 (1 - 3) | 0.13 (0.09 - 0.18) | 0 (0 - 1) | 0.01 (0 - 0.01) | -0.42 (-0.46--0.37) |  |
| Kazakhstan | 0 (0 - 1) | 0.01 (0 - 0.01) | 0 (0 - 0) | 0 (0 - 0) | -0.01 (-0.01--0.01) |  |
| Kenya | 93 (69 - 122) | 0.95 (0.71 - 1.23) | 185 (115 - 280) | 0.72 (0.45 - 1.1) | -0.19 (-0.42-0.04) |  |
| Kiribati | 0 (0 - 0) | 0.13 (0.08 - 0.2) | 0 (0 - 0) | 0.13 (0.07 - 0.22) | 0.05 (0.03-0.08) |  |
| Kuwait | 0 (0 - 0) | 0 (0 - 0.01) | 0 (0 - 0) | 0.01 (0 - 0.01) | -0.01 (-0.04-0.01) |  |
| Kyrgyzstan | 1 (1 - 1) | 0.04 (0.03 - 0.05) | 1 (0 - 1) | 0.02 (0.01 - 0.02) | -0.04 (-0.06--0.03) |  |
| Laos | 3 (2 - 4) | 0.13 (0.09 - 0.19) | 4 (2 - 8) | 0.11 (0.06 - 0.19) | -0.16 (-0.22--0.1) |  |
| Latvia | 1 (0 - 1) | 0.05 (0.04 - 0.06) | 0 (0 - 0) | 0 (0 - 0) | -0.11 (-0.13--0.09) |  |
| Lebanon | 0 (0 - 0) | 0.02 (0.01 - 0.03) | 0 (0 - 0) | 0 (0 - 0) | -0.05 (-0.05--0.04) |  |
| Lesotho | 6 (4 - 9) | 0.78 (0.5 - 1.14) | 6 (3 - 9) | 0.54 (0.31 - 0.84) | -0.04 (-0.32-0.25) |  |
| Liberia | 22 (16 - 30) | 1.9 (1.39 - 2.52) | 22 (13 - 33) | 0.68 (0.4 - 1.02) | -1.99 (-2.16--1.82) |  |
| Libya | 1 (0 - 1) | 0.04 (0.02 - 0.07) | 1 (0 - 1) | 0.01 (0.01 - 0.02) | -0.07 (-0.08--0.07) |  |
| Lithuania | 1 (0 - 1) | 0.03 (0.02 - 0.04) | 0 (0 - 0) | 0 (0 - 0) | -0.07 (-0.08--0.06) |  |
| Luxembourg | 0 (0 - 0) | 0 (0 - 0) | 0 (0 - 0) | 0 (0 - 0) | 0 (0-0) |  |
| Macedonia | 0 (0 - 0) | 0 (0 - 0.01) | 0 (0 - 0) | 0 (0 - 0) | -0.01 (-0.01--0.01) |  |
| Madagascar | 95 (69 - 125) | 1.76 (1.26 - 2.35) | 207 (136 - 288) | 1.42 (0.93 - 1.96) | -0.64 (-0.84--0.45) |  |
| Malawi | 80 (58 - 108) | 1.86 (1.35 - 2.47) | 76 (42 - 123) | 0.78 (0.45 - 1.24) | -1.7 (-2.02--1.38) |  |
| Malaysia | 16 (10 - 23) | 0.17 (0.11 - 0.25) | 8 (6 - 11) | 0.05 (0.03 - 0.06) | -0.36 (-0.41--0.32) |  |
| Maldives | 0 (0 - 0) | 0.08 (0.06 - 0.11) | 0 (0 - 0) | 0.01 (0.01 - 0.01) | -0.2 (-0.22--0.18) |  |
| Mali | 67 (53 - 83) | 1.7 (1.34 - 2.11) | 136 (95 - 189) | 1.19 (0.83 - 1.64) | -0.83 (-0.95--0.71) |  |
| Malta | 0 (0 - 0) | 0.03 (0.02 - 0.03) | 0 (0 - 0) | 0.01 (0 - 0.01) | -0.04 (-0.05--0.03) |  |
| Marshall Islands | 0 (0 - 0) | 0.21 (0.11 - 0.38) | 0 (0 - 0) | 0.2 (0.1 - 0.34) | 0 (-0.09-0.08) |  |
| Mauritania | 19 (15 - 23) | 2.01 (1.63 - 2.42) | 16 (10 - 24) | 0.77 (0.48 - 1.14) | -1.27 (-1.44--1.1) |  |
| Mauritius | 0 (0 - 0) | 0.03 (0.02 - 0.03) | 0 (0 - 1) | 0.07 (0.05 - 0.08) | 0.12 (0.06-0.17) |  |
| Mexico | 43 (35 - 52) | 0.09 (0.08 - 0.11) | 19 (14 - 26) | 0.03 (0.02 - 0.04) | -0.2 (-0.21--0.18) |  |
| Moldova | 1 (1 - 1) | 0.04 (0.03 - 0.05) | 0 (0 - 0) | 0 (0 - 0) | -0.11 (-0.13--0.09) |  |
| Monaco | 0 (0 - 0) | 0.01 (0 - 0.01) | 0 (0 - 0) | 0 (0 - 0.01) | -0.01 (-0.01--0.01) |  |
| Mongolia | 0 (0 - 0) | 0.02 (0.01 - 0.03) | 1 (0 - 1) | 0.03 (0.02 - 0.04) | 0.05 (0.03-0.07) |  |
| Montenegro | 0 (0 - 0) | 0 (0 - 0) | 0 (0 - 0) | 0 (0 - 0) | 0 (-0.01-0) |  |
| Morocco | 13 (9 - 17) | 0.1 (0.08 - 0.14) | 7 (4 - 13) | 0.04 (0.02 - 0.06) | -0.26 (-0.29--0.23) |  |
| Mozambique | 84 (57 - 121) | 1.32 (0.9 - 1.91) | 164 (93 - 262) | 1.05 (0.6 - 1.69) | 0.06 (-0.14-0.25) |  |
| Myanmar | 25 (18 - 35) | 0.11 (0.08 - 0.16) | 62 (40 - 87) | 0.2 (0.13 - 0.29) | 0.27 (0.2-0.33) |  |
| Namibia | 7 (4 - 10) | 1.03 (0.67 - 1.46) | 8 (4 - 15) | 0.61 (0.29 - 1.16) | -0.76 (-1.03--0.49) |  |
| Nauru | 0 (0 - 0) | 0.24 (0.13 - 0.41) | 0 (0 - 0) | 0.21 (0.11 - 0.37) | 0.05 (-0.05-0.16) |  |
| Nepal | 6 (4 - 9) | 0.07 (0.05 - 0.09) | 7 (4 - 11) | 0.04 (0.02 - 0.06) | -0.1 (-0.12--0.08) |  |
| Netherlands | 1 (1 - 1) | 0.01 (0.01 - 0.01) | 0 (0 - 0) | 0 (0 - 0) | -0.03 (-0.03--0.03) |  |
| New Zealand | 0 (0 - 0) | 0.01 (0 - 0.01) | 0 (0 - 0) | 0 (0 - 0) | -0.01 (-0.01--0.01) |  |
| Nicaragua | 0 (0 - 1) | 0.02 (0.02 - 0.03) | 0 (0 - 0) | 0.01 (0.01 - 0.01) | -0.05 (-0.05--0.04) |  |
| Niger | 55 (41 - 72) | 1.59 (1.21 - 2.1) | 143 (98 - 201) | 1.38 (0.95 - 1.93) | -0.38 (-0.51--0.25) |  |
| Nigeria | 407 (264 - 590) | 0.99 (0.64 - 1.41) | 432 (257 - 690) | 0.38 (0.23 - 0.61) | -1.47 (-1.63--1.3) |  |
| Niue | 0 (0 - 0) | 0.08 (0.04 - 0.16) | 0 (0 - 0) | 0.08 (0.05 - 0.13) | -0.07 (-0.11--0.04) |  |
| North Korea | 9 (5 - 15) | 0.08 (0.04 - 0.13) | 7 (4 - 13) | 0.06 (0.03 - 0.1) | -0.04 (-0.07--0.01) |  |
| Northern Mariana Islands | 0 (0 - 0) | 0.1 (0.05 - 0.16) | 0 (0 - 0) | 0.1 (0.06 - 0.17) | 0.19 (0.12-0.26) |  |
| Norway | 0 (0 - 0) | 0 (0 - 0.01) | 0 (0 - 0) | 0 (0 - 0) | -0.01 (-0.02--0.01) |  |
| Oman | 0 (0 - 0) | 0.03 (0.02 - 0.06) | 0 (0 - 0) | 0 (0 - 0.01) | -0.09 (-0.1--0.08) |  |
| Pakistan | 28 (19 - 38) | 0.06 (0.04 - 0.08) | 98 (53 - 163) | 0.08 (0.04 - 0.13) | 0.04 (0-0.08) |  |
| Palau | 0 (0 - 0) | 0.21 (0.11 - 0.35) | 0 (0 - 0) | 0.16 (0.08 - 0.26) | -0.02 (-0.08-0.05) |  |
| Palestine | 0 (0 - 0) | 0.02 (0.01 - 0.02) | 0 (0 - 0) | 0 (0 - 0.01) | -0.03 (-0.04--0.02) |  |
| Panama | 1 (1 - 2) | 0.09 (0.07 - 0.12) | 1 (1 - 1) | 0.05 (0.04 - 0.07) | -0.08 (-0.12--0.04) |  |
| Papua New Guinea | 2 (1 - 4) | 0.13 (0.07 - 0.2) | 6 (4 - 10) | 0.12 (0.08 - 0.18) | 0 (-0.02-0.02) |  |
| Paraguay | 1 (1 - 2) | 0.07 (0.05 - 0.1) | 1 (1 - 2) | 0.03 (0.02 - 0.05) | -0.11 (-0.12--0.1) |  |
| Peru | 5 (4 - 7) | 0.05 (0.03 - 0.06) | 25 (15 - 38) | 0.12 (0.08 - 0.19) | 0.23 (0.16-0.3) |  |
| Philippines | 37 (26 - 49) | 0.12 (0.08 - 0.15) | 59 (42 - 83) | 0.1 (0.07 - 0.14) | 0 (-0.03-0.02) |  |
| Poland | 4 (3 - 4) | 0.02 (0.01 - 0.02) | 0 (0 - 0) | 0 (0 - 0) | -0.05 (-0.06--0.04) |  |
| Portugal | 1 (1 - 1) | 0.02 (0.01 - 0.02) | 0 (0 - 0) | 0.01 (0 - 0.01) | -0.04 (-0.04--0.03) |  |
| Puerto Rico | 0 (0 - 0) | 0.01 (0.01 - 0.01) | 0 (0 - 0) | 0.01 (0.01 - 0.01) | -0.01 (-0.02-0.01) |  |
| Qatar | 0 (0 - 0) | 0.02 (0.01 - 0.04) | 0 (0 - 0) | 0 (0 - 0) | -0.08 (-0.09--0.07) |  |
| Romania | 3 (2 - 3) | 0.02 (0.02 - 0.03) | 0 (0 - 0) | 0 (0 - 0) | -0.05 (-0.05--0.04) |  |
| Russian Federation | 119 (95 - 145) | 0.15 (0.12 - 0.18) | 4 (3 - 6) | 0.01 (0.01 - 0.01) | -0.43 (-0.47--0.39) |  |
| Rwanda | 18 (13 - 24) | 0.56 (0.4 - 0.77) | 19 (12 - 27) | 0.27 (0.18 - 0.38) | -0.74 (-0.88--0.6) |  |
| Saint Kitts and Nevis | 0 (0 - 0) | 0.01 (0.01 - 0.01) | 0 (0 - 0) | 0.02 (0.01 - 0.03) | 0.04 (0.03-0.05) |  |
| Saint Lucia | 0 (0 - 0) | 0.01 (0.01 - 0.01) | 0 (0 - 0) | 0.01 (0.01 - 0.01) | 0 (-0.01-0) |  |
| Saint Vincent and the Grenadines | 0 (0 - 0) | 0.21 (0.16 - 0.26) | 0 (0 - 0) | 0.15 (0.12 - 0.2) | -0.12 (-0.2--0.04) |  |
| Samoa | 0 (0 - 0) | 0.03 (0.02 - 0.05) | 0 (0 - 0) | 0.03 (0.02 - 0.05) | 0.03 (0.02-0.05) |  |
| San Marino | 0 (0 - 0) | 0 (0 - 0.01) | 0 (0 - 0) | 0 (0 - 0) | -0.01 (-0.01-0) |  |
| Sao Tome and Principe | 1 (0 - 1) | 1.04 (0.56 - 1.7) | 0 (0 - 1) | 0.29 (0.15 - 0.52) | -1.96 (-2.33--1.58) |  |
| Saudi Arabia | 7 (4 - 11) | 0.11 (0.06 - 0.18) | 3 (2 - 5) | 0.02 (0.01 - 0.02) | -0.25 (-0.28--0.23) |  |
| Senegal | 64 (48 - 83) | 1.81 (1.37 - 2.36) | 121 (81 - 173) | 1.51 (1.03 - 2.14) | 0.21 (-0.01-0.44) |  |
| Serbia | 1 (0 - 1) | 0.01 (0.01 - 0.02) | 0 (0 - 0) | 0 (0 - 0) | -0.03 (-0.04--0.03) |  |
| Seychelles | 0 (0 - 0) | 0.06 (0.04 - 0.08) | 0 (0 - 0) | 0.04 (0.03 - 0.06) | -0.04 (-0.05--0.04) |  |
| Sierra Leone | 14 (9 - 20) | 0.73 (0.48 - 1.03) | 49 (29 - 75) | 1.07 (0.63 - 1.64) | 0.79 (0.73-0.85) |  |
| Singapore | 1 (1 - 1) | 0.04 (0.04 - 0.06) | 0 (0 - 0) | 0 (0 - 0.01) | -0.11 (-0.12--0.1) |  |
| Slovakia | 1 (0 - 1) | 0.03 (0.02 - 0.04) | 0 (0 - 0) | 0 (0 - 0.01) | -0.05 (-0.07--0.04) |  |
| Slovenia | 0 (0 - 0) | 0.03 (0.02 - 0.04) | 0 (0 - 0) | 0 (0 - 0) | -0.07 (-0.09--0.06) |  |
| Solomon Islands | 1 (0 - 1) | 0.53 (0.23 - 0.9) | 2 (1 - 4) | 0.68 (0.41 - 1.03) | 0.34 (0.27-0.42) |  |
| Somalia | 38 (25 - 54) | 1.18 (0.77 - 1.68) | 62 (41 - 88) | 0.69 (0.46 - 0.99) | -0.78 (-0.86--0.7) |  |
| South Africa | 193 (128 - 272) | 0.97 (0.64 - 1.36) | 65 (47 - 84) | 0.2 (0.15 - 0.26) | -1.07 (-1.52--0.63) |  |
| South Korea | 3 (2 - 3) | 0.01 (0.01 - 0.01) | 0 (0 - 1) | 0 (0 - 0) | -0.02 (-0.03--0.02) |  |
| South Sudan | 24 (14 - 35) | 0.98 (0.58 - 1.44) | 32 (21 - 47) | 0.71 (0.46 - 1.06) | -0.26 (-0.42--0.1) |  |
| Spain | 2 (1 - 2) | 0.01 (0.01 - 0.01) | 0 (0 - 1) | 0 (0 - 0) | -0.02 (-0.02--0.02) |  |
| Sri Lanka | 44 (28 - 64) | 0.45 (0.28 - 0.65) | 13 (7 - 20) | 0.12 (0.07 - 0.19) | -0.91 (-0.96--0.86) |  |
| Sudan | 12 (8 - 18) | 0.13 (0.09 - 0.19) | 12 (6 - 21) | 0.05 (0.03 - 0.09) | -0.24 (-0.29--0.19) |  |
| Suriname | 1 (0 - 1) | 0.25 (0.14 - 0.38) | 1 (0 - 1) | 0.25 (0.15 - 0.38) | 0.08 (-0.02-0.19) |  |
| Swaziland | 2 (1 - 3) | 0.6 (0.34 - 0.93) | 2 (1 - 4) | 0.34 (0.15 - 0.63) | -0.33 (-0.5--0.15) |  |
| Sweden | 0 (0 - 0) | 0.01 (0.01 - 0.01) | 0 (0 - 0) | 0 (0 - 0) | -0.02 (-0.02--0.01) |  |
| Switzerland | 0 (0 - 1) | 0.01 (0.01 - 0.02) | 0 (0 - 0) | 0 (0 - 0) | -0.04 (-0.04--0.04) |  |
| Syria | 3 (2 - 4) | 0.05 (0.03 - 0.07) | 0 (0 - 1) | 0 (0 - 0.01) | -0.15 (-0.16--0.13) |  |
| Taiwan | 1 (1 - 2) | 0.01 (0.01 - 0.01) | 1 (0 - 1) | 0 (0 - 0.01) | -0.01 (-0.02--0.01) |  |
| Tajikistan | 1 (1 - 1) | 0.03 (0.02 - 0.04) | 0 (0 - 1) | 0.01 (0.01 - 0.01) | -0.07 (-0.08--0.05) |  |
| Tanzania | 227 (169 - 293) | 1.92 (1.43 - 2.46) | 243 (159 - 357) | 0.77 (0.5 - 1.12) | -1.4 (-1.5--1.3) |  |
| Thailand | 14 (8 - 24) | 0.04 (0.02 - 0.07) | 8 (5 - 13) | 0.03 (0.02 - 0.04) | -0.09 (-0.14--0.05) |  |
| The Bahamas | 0 (0 - 0) | 0.04 (0.03 - 0.05) | 0 (0 - 1) | 0.18 (0.13 - 0.24) | 0.47 (0.37-0.57) |  |
| The Gambia | 11 (7 - 15) | 2.36 (1.56 - 3.27) | 26 (15 - 39) | 2.05 (1.22 - 3.11) | -0.51 (-0.73--0.28) |  |
| Timor-Leste | 0 (0 - 0) | 0.09 (0.06 - 0.12) | 1 (0 - 1) | 0.1 (0.06 - 0.16) | 0.02 (-0.02-0.05) |  |
| Togo | 31 (21 - 43) | 1.87 (1.28 - 2.51) | 30 (17 - 46) | 0.7 (0.4 - 1.06) | -1.89 (-2.11--1.66) |  |
| Tokelau | 0 (0 - 0) | 0.16 (0.07 - 0.29) | 0 (0 - 0) | 0.13 (0.07 - 0.2) | -0.16 (-0.21--0.11) |  |
| Tonga | 0 (0 - 0) | 0.08 (0.04 - 0.12) | 0 (0 - 0) | 0.05 (0.03 - 0.09) | 0.01 (-0.03-0.04) |  |
| Trinidad and Tobago | 0 (0 - 0) | 0.01 (0.01 - 0.02) | 1 (1 - 1) | 0.12 (0.08 - 0.17) | 0.42 (0.34-0.49) |  |
| Tunisia | 2 (1 - 2) | 0.04 (0.02 - 0.05) | 1 (0 - 2) | 0.02 (0.01 - 0.03) | -0.07 (-0.08--0.07) |  |
| Turkey | 13 (8 - 19) | 0.05 (0.03 - 0.07) | 3 (2 - 4) | 0.01 (0 - 0.01) | -0.12 (-0.13--0.1) |  |
| Turkmenistan | 1 (0 - 1) | 0.03 (0.02 - 0.04) | 1 (0 - 1) | 0.02 (0.01 - 0.03) | -0.03 (-0.04--0.02) |  |
| Tuvalu | 0 (0 - 0) | 0.25 (0.13 - 0.48) | 0 (0 - 0) | 0.11 (0.06 - 0.18) | -0.39 (-0.41--0.37) |  |
| Uganda | 51 (33 - 76) | 0.69 (0.44 - 1.01) | 196 (124 - 277) | 0.93 (0.59 - 1.32) | 0.33 (0.03-0.63) |  |
| Ukraine | 3 (2 - 3) | 0.01 (0.01 - 0.01) | 0 (0 - 1) | 0 (0 - 0) | -0.02 (-0.02--0.02) |  |
| United Arab Emirates | 0 (0 - 0) | 0.03 (0.01 - 0.05) | 0 (0 - 0) | 0 (0 - 0.01) | -0.07 (-0.08--0.06) |  |
| United Kingdom | 6 (5 - 7) | 0.02 (0.02 - 0.02) | 1 (1 - 1) | 0 (0 - 0) | -0.05 (-0.05--0.05) |  |
| United States | 48 (38 - 59) | 0.04 (0.03 - 0.04) | 14 (11 - 18) | 0.01 (0.01 - 0.01) | -0.06 (-0.08--0.05) |  |
| Uruguay | 0 (0 - 0) | 0.01 (0 - 0.01) | 0 (0 - 0) | 0.01 (0 - 0.01) | 0 (-0.01-0) |  |
| Uzbekistan | 2 (2 - 3) | 0.02 (0.02 - 0.03) | 1 (1 - 1) | 0.01 (0 - 0.01) | -0.04 (-0.05--0.03) |  |
| Vanuatu | 0 (0 - 0) | 0.13 (0.06 - 0.23) | 0 (0 - 0) | 0.13 (0.07 - 0.22) | 0 (-0.03-0.03) |  |
| Venezuela | 6 (5 - 7) | 0.06 (0.05 - 0.07) | 5 (3 - 7) | 0.04 (0.03 - 0.05) | -0.03 (-0.06--0.01) |  |
| Vietnam | 13 (6 - 24) | 0.04 (0.02 - 0.07) | 19 (10 - 32) | 0.04 (0.02 - 0.06) | 0.02 (0.01-0.02) |  |
| Virgin Islands, U.S. | 0 (0 - 0) | 0.01 (0.01 - 0.02) | 0 (0 - 0) | 0 (0 - 0.01) | 0 (0-0) |  |
| Yemen | 7 (4 - 13) | 0.14 (0.07 - 0.24) | 22 (9 - 42) | 0.13 (0.06 - 0.25) | -0.04 (-0.13-0.04) |  |
| Zambia | 42 (30 - 58) | 1.2 (0.85 - 1.67) | 61 (37 - 95) | 0.61 (0.37 - 0.94) | -1.09 (-1.19--0.99) |  |
| Zimbabwe | 57 (38 - 78) | 1.2 (0.82 - 1.65) | 137 (84 - 216) | 1.63 (0.99 - 2.58) | 1.71 (1.13-2.3) |  |

CI: confidence interval, EAPC: estimated annual percent change, EP: ectopic pregnancy, UI: uncertainty interval

**Table S4.** **DALYs of EP in 1990 and 2021 for female with EAPC from 1990 and 2021 in global, regional, and Countries or territories**

| **Location** | **1990** | | **2021** | | **EAPC % (95% CI) 1990–2021** |
| --- | --- | --- | --- | --- | --- |
| **Cases (95% UI)** | **Age‑standardized DALY per 100 000 population (95% UI)** | **Cases (95% UI)** | **Age‑standardized DALY per 100 000 population (95% UI)** |
|  |
| Afghanistan | 450 (285 - 655) | 10.66 (6.83 - 15.67) | 1571 (936 - 2306) | 10.81 (6.45 - 16.26) | 0.27 (0.02-0.52) |  |
| Albania | 12 (8 - 16) | 0.64 (0.46 - 0.87) | 2 (1 - 3) | 0.18 (0.11 - 0.27) | -0.78 (-0.89--0.68) |  |
| Algeria | 381 (253 - 531) | 3.24 (2.13 - 4.56) | 249 (162 - 361) | 1.06 (0.69 - 1.53) | -2.29 (-2.36--2.21) |  |
| American Samoa | 2 (1 - 3) | 7.21 (4.19 - 10.93) | 2 (1 - 3) | 8.81 (5.36 - 14.11) | 2.12 (1.48-2.77) |  |
| Andorra | 0 (0 - 0) | 0.47 (0.27 - 0.73) | 0 (0 - 0) | 0.24 (0.15 - 0.37) | -0.51 (-0.53--0.49) |  |
| Angola | 4404 (2994 - 6160) | 93.83 (63.59 - 131.23) | 16105 (9914 - 24616) | 104.45 (64.28 - 160.14) | 0.5 (0.2-0.8) |  |
| Antigua and Barbuda | 0 (0 - 0) | 1.07 (0.85 - 1.35) | 2 (2 - 2) | 4.17 (3.29 - 5.11) | 3.86 (3.03-4.69) |  |
| Argentina | 179 (128 - 235) | 1.11 (0.79 - 1.46) | 257 (195 - 335) | 1.08 (0.82 - 1.41) | 0.16 (-0.23-0.54) |  |
| Armenia | 11 (9 - 15) | 0.58 (0.46 - 0.76) | 3 (2 - 4) | 0.19 (0.13 - 0.27) | -0.67 (-0.85--0.49) |  |
| Australia | 76 (58 - 98) | 0.84 (0.64 - 1.08) | 23 (18 - 30) | 0.19 (0.14 - 0.25) | -1.39 (-1.56--1.21) |  |
| Austria | 37 (27 - 49) | 0.9 (0.66 - 1.18) | 19 (11 - 33) | 0.48 (0.26 - 0.81) | -0.68 (-0.77--0.59) |  |
| Azerbaijan | 26 (20 - 34) | 0.6 (0.44 - 0.77) | 12 (8 - 16) | 0.22 (0.14 - 0.31) | -0.85 (-0.98--0.72) |  |
| Bahrain | 4 (2 - 5) | 1.47 (0.99 - 2.11) | 5 (3 - 7) | 0.76 (0.5 - 1.12) | -0.69 (-0.98--0.39) |  |
| Bangladesh | 3043 (2346 - 3864) | 5.52 (4.23 - 6.97) | 6402 (4223 - 8713) | 6.67 (4.4 - 9.07) | 1.17 (0.98-1.36) |  |
| Barbados | 3 (3 - 4) | 2.18 (1.73 - 2.71) | 11 (8 - 15) | 7.96 (5.85 - 11) | 4.58 (3.55-5.62) |  |
| Belarus | 138 (111 - 171) | 2.57 (2.07 - 3.19) | 26 (17 - 40) | 0.63 (0.41 - 0.95) | -2.02 (-2.25--1.78) |  |
| Belgium | 30 (22 - 41) | 0.6 (0.44 - 0.81) | 17 (10 - 28) | 0.34 (0.19 - 0.56) | -0.55 (-0.61--0.49) |  |
| Belize | 1 (1 - 1) | 1.13 (0.89 - 1.38) | 9 (7 - 11) | 3.48 (2.75 - 4.36) | 3.49 (2.79-4.19) |  |
| Benin | 3225 (2469 - 4186) | 141.27 (108.94 - 182.2) | 2712 (1625 - 3978) | 37.03 (22.42 - 53.75) | -4.5 (-4.99--4) |  |
| Bermuda | 0 (0 - 1) | 1.41 (1.11 - 1.79) | 0 (0 - 0) | 0.25 (0.18 - 0.33) | -1.82 (-2.13--1.5) |  |
| Bhutan | 20 (12 - 29) | 6.31 (3.9 - 9.06) | 15 (9 - 26) | 3.47 (1.97 - 5.88) | -1.76 (-2.1--1.43) |  |
| Bolivia | 144 (108 - 192) | 4.57 (3.43 - 6.1) | 769 (535 - 1117) | 11.93 (8.34 - 17.19) | 2.82 (2.02-3.62) |  |
| Bosnia and Herzegovina | 9 (7 - 12) | 0.37 (0.27 - 0.49) | 3 (2 - 4) | 0.2 (0.13 - 0.28) | -0.54 (-0.63--0.45) |  |
| Botswana | 811 (474 - 1264) | 110.65 (63.73 - 172.31) | 358 (216 - 512) | 26.29 (15.8 - 37.53) | -3.52 (-4.12--2.92) |  |
| Brazil | 6770 (5743 - 8175) | 8.29 (7.04 - 9.98) | 2356 (1918 - 2840) | 2.05 (1.67 - 2.47) | -2.66 (-3.2--2.11) |  |
| Brunei | 24 (14 - 39) | 16.4 (9.4 - 26.28) | 12 (7 - 18) | 4.38 (2.63 - 6.77) | -2.88 (-3.26--2.49) |  |
| Bulgaria | 53 (43 - 66) | 1.36 (1.1 - 1.71) | 9 (7 - 12) | 0.38 (0.29 - 0.5) | -1.47 (-1.66--1.28) |  |
| Burkina Faso | 4632 (3099 - 6391) | 111.17 (74.79 - 153.79) | 8863 (5420 - 13191) | 76.6 (46.57 - 112.23) | -0.8 (-1.04--0.57) |  |
| Burundi | 2741 (1832 - 3750) | 108 (72.09 - 148.3) | 4751 (3073 - 6767) | 75.44 (48.97 - 106.91) | -1.33 (-1.5--1.17) |  |
| Cambodia | 742 (507 - 1041) | 14.36 (9.8 - 20.01) | 1030 (632 - 1703) | 10.97 (6.68 - 18.21) | -1.06 (-1.32--0.8) |  |
| Cameroon | 5455 (3869 - 7304) | 100.91 (71.87 - 133.44) | 5854 (3548 - 8491) | 33.42 (20.26 - 48.21) | -2.97 (-3.28--2.64) |  |
| Canada | 87 (66 - 113) | 0.57 (0.43 - 0.74) | 47 (35 - 61) | 0.29 (0.22 - 0.37) | -0.53 (-0.62--0.44) |  |
| Cape Verde | 72 (45 - 102) | 41.2 (25.74 - 59.8) | 31 (17 - 49) | 9.85 (5.39 - 15.89) | -4.42 (-5.09--3.75) |  |
| Central African Republic | 1394 (1063 - 1771) | 108.9 (81.39 - 139.57) | 2630 (1712 - 3866) | 94.45 (61.46 - 139.78) | -0.24 (-0.45--0.03) |  |
| Chad | 2615 (1955 - 3433) | 94.2 (70.56 - 122.87) | 10337 (7262 - 13967) | 126.3 (88.39 - 168.99) | 1.11 (0.94-1.29) |  |
| Chile | 164 (131 - 201) | 2.14 (1.72 - 2.62) | 89 (67 - 116) | 0.92 (0.7 - 1.2) | -1.73 (-2.05--1.4) |  |
| China | 16153 (11665 - 21446) | 2.35 (1.7 - 3.13) | 5885 (4466 - 7805) | 0.95 (0.72 - 1.26) | -1.44 (-1.62--1.27) |  |
| Colombia | 1481 (1124 - 1870) | 7.91 (6.01 - 10.06) | 697 (496 - 969) | 2.6 (1.85 - 3.62) | -2.74 (-3.18--2.31) |  |
| Comoros | 140 (68 - 219) | 70.75 (35.45 - 110.19) | 120 (71 - 193) | 30.72 (18.13 - 49.55) | -3.41 (-3.9--2.92) |  |
| Congo | 1322 (863 - 1934) | 117.77 (77.06 - 172.58) | 2680 (1633 - 4037) | 91.63 (55.51 - 138.26) | -0.65 (-1.32-0.03) |  |
| Cook Islands | 0 (0 - 0) | 0.54 (0.34 - 0.8) | 0 (0 - 0) | 0.23 (0.15 - 0.33) | -0.6 (-0.7--0.5) |  |
| Costa Rica | 28 (22 - 34) | 1.65 (1.35 - 2.06) | 13 (10 - 16) | 0.49 (0.38 - 0.62) | -1.94 (-2.04--1.84) |  |
| Cote d'Ivoire | 5247 (3547 - 7348) | 89.53 (61.09 - 126.44) | 9884 (5608 - 15328) | 70.08 (39.85 - 109.46) | -0.16 (-0.41-0.09) |  |
| Croatia | 18 (15 - 23) | 0.77 (0.62 - 0.95) | 3 (2 - 4) | 0.17 (0.11 - 0.25) | -1.05 (-1.23--0.87) |  |
| Cuba | 56 (44 - 70) | 0.85 (0.68 - 1.06) | 104 (81 - 136) | 2.19 (1.7 - 2.85) | 2.25 (1.41-3.11) |  |
| Cyprus | 10 (5 - 15) | 2.37 (1.32 - 3.65) | 4 (3 - 7) | 0.57 (0.37 - 0.85) | -3.06 (-3.29--2.83) |  |
| Czech Republic | 76 (58 - 95) | 1.59 (1.21 - 2) | 12 (8 - 18) | 0.3 (0.21 - 0.43) | -1.63 (-2.01--1.25) |  |
| Democratic Republic of the Congo | 16866 (11646 - 23652) | 98.94 (68.58 - 135.76) | 54754 (36924 - 75220) | 130.8 (88.52 - 184.47) | 1.92 (1.52-2.31) |  |
| Denmark | 27 (19 - 36) | 1.03 (0.73 - 1.38) | 10 (6 - 16) | 0.41 (0.25 - 0.66) | -1.44 (-1.65--1.22) |  |
| Djibouti | 197 (132 - 281) | 98.43 (66.74 - 139.96) | 575 (328 - 919) | 86.75 (49.15 - 138.82) | -0.3 (-0.82-0.23) |  |
| Dominica | 1 (0 - 1) | 1.49 (1.08 - 2.02) | 5 (2 - 7) | 13.79 (7.52 - 21.64) | 6.72 (5.57-7.88) |  |
| Dominican Republic | 79 (60 - 99) | 1.9 (1.45 - 2.39) | 224 (160 - 309) | 3.72 (2.65 - 5.12) | 2.46 (1.74-3.18) |  |
| Ecuador | 51 (41 - 65) | 0.96 (0.77 - 1.2) | 392 (280 - 558) | 4.02 (2.89 - 5.7) | 4.24 (3.25-5.24) |  |
| Egypt | 897 (677 - 1153) | 3.3 (2.49 - 4.25) | 735 (491 - 1009) | 1.36 (0.91 - 1.87) | -0.95 (-1.35--0.55) |  |
| El Salvador | 192 (152 - 235) | 6.85 (5.54 - 8.4) | 60 (40 - 87) | 1.63 (1.09 - 2.35) | -2.81 (-3.59--2.03) |  |
| Equatorial Guinea | 175 (118 - 241) | 88.58 (59.35 - 123.15) | 260 (122 - 464) | 35.28 (16.78 - 62.24) | -3.01 (-3.7--2.32) |  |
| Eritrea | 1439 (1114 - 1814) | 90.87 (69.21 - 115.17) | 4056 (2408 - 5904) | 118.18 (69.15 - 173.7) | 0.66 (0.37-0.96) |  |
| Estonia | 51 (41 - 63) | 6.68 (5.4 - 8.3) | 3 (1 - 5) | 0.48 (0.27 - 0.8) | -5.34 (-5.81--4.87) |  |
| Ethiopia | 27663 (20775 - 36200) | 132.12 (97.42 - 173.57) | 24471 (16416 - 33457) | 48.14 (32.61 - 65.68) | -4.33 (-4.74--3.91) |  |
| Federated States of Micronesia | 4 (2 - 6) | 7.99 (4.69 - 12.33) | 3 (1 - 4) | 4.39 (2.4 - 7.59) | -0.98 (-1.32--0.64) |  |
| Fiji | 93 (51 - 152) | 22.44 (12.48 - 36.31) | 45 (25 - 75) | 9.8 (5.43 - 16.32) | -2.75 (-2.93--2.58) |  |
| Finland | 15 (11 - 19) | 0.59 (0.44 - 0.75) | 7 (5 - 9) | 0.29 (0.21 - 0.41) | -0.58 (-0.63--0.53) |  |
| France | 263 (204 - 325) | 0.88 (0.69 - 1.09) | 88 (61 - 127) | 0.32 (0.22 - 0.47) | -1.28 (-1.35--1.21) |  |
| Gabon | 546 (378 - 753) | 118 (80.81 - 165.43) | 237 (123 - 413) | 22.65 (11.77 - 39.11) | -5.49 (-6--4.97) |  |
| Georgia | 33 (25 - 41) | 1.13 (0.88 - 1.42) | 12 (9 - 15) | 0.75 (0.58 - 0.95) | 0.17 (-0.2-0.54) |  |
| Germany | 150 (122 - 183) | 0.36 (0.3 - 0.44) | 47 (35 - 63) | 0.13 (0.1 - 0.18) | -0.5 (-0.56--0.44) |  |
| Ghana | 5213 (3061 - 7752) | 68.98 (40.79 - 102.74) | 5077 (3430 - 7333) | 25.99 (17.65 - 37.18) | -2.66 (-2.8--2.52) |  |
| Greece | 30 (24 - 38) | 0.6 (0.48 - 0.76) | 16 (12 - 22) | 0.4 (0.3 - 0.52) | -0.29 (-0.37--0.22) |  |
| Greenland | 1 (1 - 2) | 3.19 (1.94 - 5.08) | 0 (0 - 0) | 0.59 (0.37 - 0.88) | -3.78 (-4.19--3.37) |  |
| Grenada | 1 (1 - 1) | 2.23 (1.75 - 2.8) | 2 (2 - 3) | 4.25 (3.09 - 5.63) | 2.62 (1.76-3.49) |  |
| Guam | 1 (1 - 2) | 1.66 (1.11 - 2.35) | 1 (1 - 1) | 1.28 (0.9 - 1.8) | 0.46 (-0.02-0.94) |  |
| Guatemala | 582 (469 - 721) | 15.34 (12.36 - 18.92) | 870 (637 - 1117) | 9.41 (6.92 - 12.04) | -1.43 (-2.16--0.69) |  |
| Guinea | 3345 (2376 - 4592) | 118.77 (83.97 - 161.62) | 6395 (4130 - 9409) | 92.04 (60.46 - 135.82) | -0.91 (-1.03--0.78) |  |
| Guinea-Bissau | 867 (535 - 1231) | 170.66 (105.49 - 244.02) | 1185 (676 - 1895) | 103.74 (59.14 - 166.47) | -1.55 (-1.71--1.4) |  |
| Guyana | 18 (13 - 24) | 3.99 (2.85 - 5.45) | 118 (78 - 179) | 27.38 (18.03 - 41.41) | 6.29 (4.9-7.7) |  |
| Haiti | 404 (285 - 566) | 12.56 (8.89 - 17.49) | 2139 (1320 - 3347) | 29.07 (17.93 - 45.56) | 3.31 (2.4-4.22) |  |
| Honduras | 81 (61 - 106) | 3.54 (2.65 - 4.65) | 34 (21 - 51) | 0.57 (0.35 - 0.86) | -3.41 (-3.69--3.13) |  |
| Hungary | 122 (100 - 152) | 2.54 (2.1 - 3.18) | 14 (11 - 18) | 0.37 (0.29 - 0.47) | -2.37 (-2.89--1.86) |  |
| Iceland | 0 (0 - 1) | 0.31 (0.2 - 0.45) | 0 (0 - 1) | 0.23 (0.13 - 0.36) | -0.18 (-0.21--0.16) |  |
| India | 12704 (10440 - 15395) | 3.02 (2.49 - 3.64) | 15412 (12231 - 19264) | 1.97 (1.57 - 2.46) | -1.2 (-1.41--1) |  |
| Indonesia | 12974 (9916 - 16608) | 13.29 (10.22 - 16.86) | 16043 (11397 - 22976) | 10.59 (7.53 - 15.23) | -1.15 (-1.79--0.5) |  |
| Iran | 937 (657 - 1260) | 3.57 (2.52 - 4.81) | 269 (185 - 369) | 0.57 (0.39 - 0.79) | -3.01 (-3.29--2.73) |  |
| Iraq | 321 (197 - 487) | 3.95 (2.39 - 6.01) | 407 (248 - 677) | 1.96 (1.2 - 3.27) | -1.56 (-1.94--1.18) |  |
| Ireland | 21 (16 - 26) | 1.17 (0.92 - 1.47) | 8 (6 - 12) | 0.36 (0.26 - 0.51) | -1.06 (-1.26--0.86) |  |
| Israel | 23 (18 - 30) | 0.94 (0.71 - 1.21) | 21 (12 - 34) | 0.48 (0.28 - 0.78) | -0.78 (-0.85--0.71) |  |
| Italy | 132 (109 - 162) | 0.46 (0.38 - 0.57) | 38 (25 - 54) | 0.17 (0.11 - 0.24) | -0.49 (-0.59--0.39) |  |
| Jamaica | 4 (3 - 5) | 0.3 (0.23 - 0.39) | 72 (47 - 110) | 4.49 (2.92 - 6.77) | 5.06 (3.55-6.6) |  |
| Japan | 397 (317 - 496) | 0.68 (0.54 - 0.85) | 87 (68 - 114) | 0.19 (0.15 - 0.25) | -1.06 (-1.18--0.95) |  |
| Jordan | 127 (84 - 173) | 7.95 (5.22 - 10.63) | 38 (24 - 54) | 0.61 (0.4 - 0.88) | -6.18 (-6.46--5.89) |  |
| Kazakhstan | 50 (37 - 64) | 0.56 (0.41 - 0.73) | 35 (24 - 51) | 0.38 (0.26 - 0.54) | -0.2 (-0.32--0.07) |  |
| Kenya | 5706 (4243 - 7474) | 54.95 (40.99 - 71.48) | 11042 (6882 - 16610) | 41.47 (25.8 - 62.85) | -0.41 (-0.86-0.04) |  |
| Kiribati | 4 (2 - 5) | 8.56 (5.47 - 12.88) | 6 (3 - 9) | 8.41 (4.76 - 13.54) | 0.31 (0.13-0.5) |  |
| Kuwait | 4 (3 - 5) | 0.41 (0.31 - 0.53) | 13 (10 - 18) | 0.42 (0.33 - 0.56) | -0.49 (-1.27-0.3) |  |
| Kyrgyzstan | 63 (52 - 77) | 2.76 (2.27 - 3.36) | 45 (35 - 58) | 1.25 (0.96 - 1.59) | -0.96 (-1.34--0.58) |  |
| Laos | 166 (120 - 235) | 8.21 (5.88 - 11.62) | 275 (148 - 470) | 6.63 (3.58 - 11.41) | -1.16 (-1.53--0.78) |  |
| Latvia | 40 (32 - 50) | 3.08 (2.48 - 3.86) | 4 (2 - 6) | 0.47 (0.27 - 0.78) | -2.93 (-3.36--2.49) |  |
| Lebanon | 18 (11 - 28) | 1.15 (0.72 - 1.75) | 6 (4 - 9) | 0.2 (0.13 - 0.3) | -2.04 (-2.11--1.96) |  |
| Lesotho | 353 (226 - 510) | 45.92 (29.47 - 66.49) | 364 (205 - 567) | 33.13 (18.8 - 51.75) | 0.1 (-0.58-0.78) |  |
| Liberia | 1412 (1003 - 1881) | 115.87 (83.73 - 153.24) | 1470 (878 - 2234) | 45.43 (27.1 - 68.65) | -3.14 (-3.41--2.86) |  |
| Libya | 48 (29 - 73) | 2.72 (1.65 - 4.17) | 37 (21 - 59) | 0.91 (0.53 - 1.46) | -1.83 (-1.95--1.71) |  |
| Lithuania | 39 (30 - 50) | 2.07 (1.62 - 2.65) | 5 (2 - 8) | 0.41 (0.2 - 0.73) | -2.13 (-2.45--1.8) |  |
| Luxembourg | 1 (0 - 1) | 0.26 (0.17 - 0.37) | 1 (0 - 1) | 0.2 (0.12 - 0.32) | -0.2 (-0.23--0.17) |  |
| Macedonia | 5 (3 - 6) | 0.45 (0.32 - 0.6) | 2 (1 - 3) | 0.17 (0.11 - 0.25) | -0.72 (-0.79--0.64) |  |
| Madagascar | 5795 (4249 - 7615) | 104.01 (75.34 - 137.53) | 12665 (8258 - 17518) | 84.33 (55.68 - 116.59) | -0.99 (-1.29--0.69) |  |
| Malawi | 4830 (3455 - 6497) | 107.61 (77.51 - 143.48) | 4608 (2541 - 7523) | 45.62 (26.23 - 73.8) | -2.82 (-3.37--2.26) |  |
| Malaysia | 977 (616 - 1412) | 10.31 (6.49 - 14.87) | 509 (345 - 702) | 2.9 (1.98 - 3.98) | -3.56 (-3.84--3.27) |  |
| Maldives | 5 (4 - 7) | 5.22 (3.68 - 6.88) | 2 (1 - 2) | 0.7 (0.47 - 0.99) | -4.01 (-4.23--3.8) |  |
| Mali | 4158 (3267 - 5137) | 102.52 (80.51 - 127) | 8636 (6006 - 11929) | 72.82 (50.73 - 100.72) | -1.32 (-1.51--1.12) |  |
| Malta | 3 (2 - 4) | 1.62 (1.29 - 2.04) | 1 (1 - 1) | 0.44 (0.34 - 0.56) | -1.29 (-1.54--1.05) |  |
| Marshall Islands | 3 (1 - 5) | 12.86 (7.05 - 23.2) | 4 (2 - 7) | 12.78 (6.8 - 21.85) | 0.07 (-0.33-0.48) |  |
| Mauritania | 1176 (931 - 1417) | 119.19 (95.97 - 143.74) | 964 (613 - 1407) | 44.66 (28.45 - 65.08) | -2.39 (-2.64--2.14) |  |
| Mauritius | 11 (8 - 13) | 1.64 (1.31 - 2.03) | 25 (20 - 31) | 4 (3.17 - 4.94) | 1.62 (0.9-2.35) |  |
| Mexico | 2817 (2271 - 3414) | 6 (4.84 - 7.19) | 1310 (982 - 1744) | 1.88 (1.41 - 2.5) | -2.81 (-2.95--2.67) |  |
| Moldova | 66 (53 - 82) | 2.8 (2.27 - 3.49) | 6 (4 - 9) | 0.36 (0.23 - 0.51) | -3.19 (-3.58--2.8) |  |
| Monaco | 0 (0 - 0) | 0.52 (0.29 - 0.78) | 0 (0 - 0) | 0.38 (0.24 - 0.57) | -0.28 (-0.31--0.25) |  |
| Mongolia | 18 (14 - 24) | 1.66 (1.21 - 2.16) | 36 (24 - 50) | 2.1 (1.43 - 2.91) | 0.9 (0.58-1.23) |  |
| Montenegro | 1 (1 - 1) | 0.3 (0.21 - 0.44) | 1 (0 - 1) | 0.22 (0.14 - 0.32) | -0.22 (-0.29--0.15) |  |
| Morocco | 810 (594 - 1076) | 6.3 (4.67 - 8.43) | 437 (242 - 766) | 2.23 (1.23 - 3.91) | -3.13 (-3.41--2.84) |  |
| Mozambique | 5112 (3461 - 7351) | 78.89 (54.03 - 113.43) | 10231 (5909 - 16097) | 63.17 (36.13 - 101.89) | 0.12 (-0.23-0.47) |  |
| Myanmar | 1630 (1165 - 2259) | 7.04 (5.04 - 9.85) | 3841 (2452 - 5424) | 12.64 (8.08 - 17.81) | 1.63 (1.19-2.07) |  |
| Namibia | 416 (270 - 587) | 60.12 (39.01 - 84.87) | 489 (239 - 934) | 35.99 (17.5 - 68.46) | -1.57 (-2.11--1.04) |  |
| Nauru | 1 (0 - 1) | 14.97 (8.13 - 25.36) | 1 (0 - 1) | 13.27 (7.08 - 23.15) | 0.2 (-0.26-0.67) |  |
| Nepal | 429 (305 - 586) | 4.45 (3.19 - 6.01) | 451 (269 - 688) | 2.34 (1.4 - 3.58) | -1.64 (-1.89--1.39) |  |
| Netherlands | 64 (51 - 80) | 0.78 (0.63 - 0.98) | 22 (16 - 31) | 0.31 (0.21 - 0.42) | -1.07 (-1.14--1) |  |
| New Zealand | 11 (8 - 15) | 0.59 (0.42 - 0.82) | 9 (5 - 14) | 0.37 (0.22 - 0.56) | -0.5 (-0.63--0.38) |  |
| Nicaragua | 36 (27 - 45) | 1.84 (1.39 - 2.32) | 25 (19 - 33) | 0.67 (0.5 - 0.86) | -1.63 (-1.78--1.48) |  |
| Niger | 3368 (2543 - 4411) | 93.71 (70.76 - 122.6) | 8891 (6090 - 12508) | 81.11 (56.15 - 113.17) | -0.63 (-0.86--0.4) |  |
| Nigeria | 25505 (16712 - 37312) | 59.71 (38.99 - 85.68) | 26754 (15890 - 42536) | 22.69 (13.67 - 35.95) | -3.79 (-4.21--3.38) |  |
| Niue | 0 (0 - 0) | 5.4 (2.66 - 9.81) | 0 (0 - 0) | 5.48 (3.32 - 8.61) | -0.94 (-1.41--0.48) |  |
| North Korea | 596 (322 - 978) | 5.02 (2.7 - 8.2) | 457 (254 - 806) | 3.48 (1.94 - 6.12) | -0.65 (-0.97--0.33) |  |
| Northern Mariana Islands | 2 (1 - 3) | 5.98 (3.09 - 10.03) | 1 (1 - 2) | 6.05 (3.61 - 9.61) | 1.51 (0.79-2.23) |  |
| Norway | 9 (6 - 12) | 0.41 (0.31 - 0.55) | 5 (3 - 8) | 0.19 (0.11 - 0.31) | -0.65 (-0.78--0.51) |  |
| Oman | 15 (9 - 25) | 2.29 (1.31 - 3.75) | 8 (5 - 11) | 0.35 (0.23 - 0.51) | -2.77 (-2.93--2.6) |  |
| Pakistan | 2020 (1479 - 2684) | 4.18 (3.08 - 5.54) | 6641 (3705 - 10719) | 5.1 (2.84 - 8.2) | 0.33 (-0.07-0.74) |  |
| Palau | 1 (1 - 2) | 13.16 (7.06 - 21.89) | 1 (0 - 1) | 10.16 (5.63 - 17.15) | 0.01 (-0.37-0.39) |  |
| Palestine | 12 (7 - 17) | 1.28 (0.8 - 1.92) | 10 (7 - 14) | 0.37 (0.26 - 0.51) | -1.47 (-1.74--1.2) |  |
| Panama | 79 (64 - 96) | 5.98 (4.85 - 7.29) | 73 (53 - 94) | 3.35 (2.46 - 4.3) | -0.92 (-1.37--0.46) |  |
| Papua New Guinea | 147 (78 - 225) | 7.67 (4.14 - 11.82) | 409 (269 - 599) | 7.54 (4.98 - 11.1) | 0.09 (-0.05-0.22) |  |
| Paraguay | 89 (66 - 116) | 4.51 (3.31 - 5.84) | 78 (52 - 111) | 1.97 (1.32 - 2.81) | -1.67 (-1.82--1.52) |  |
| Peru | 357 (266 - 475) | 3.17 (2.38 - 4.18) | 1510 (935 - 2319) | 7.67 (4.75 - 11.78) | 2.23 (1.55-2.91) |  |
| Philippines | 2424 (1736 - 3173) | 7.43 (5.34 - 9.67) | 3767 (2684 - 5164) | 6.22 (4.43 - 8.57) | -0.12 (-0.34-0.11) |  |
| Poland | 221 (176 - 271) | 1.15 (0.91 - 1.42) | 14 (10 - 19) | 0.09 (0.06 - 0.11) | -2.01 (-2.39--1.62) |  |
| Portugal | 60 (48 - 75) | 1.2 (0.96 - 1.49) | 17 (13 - 21) | 0.4 (0.31 - 0.49) | -1.4 (-1.55--1.25) |  |
| Puerto Rico | 10 (8 - 13) | 0.54 (0.44 - 0.66) | 7 (5 - 9) | 0.49 (0.36 - 0.64) | -0.33 (-0.77-0.11) |  |
| Qatar | 3 (2 - 4) | 1.65 (1.05 - 2.46) | 3 (2 - 5) | 0.24 (0.15 - 0.35) | -2.71 (-2.87--2.54) |  |
| Romania | 178 (139 - 227) | 1.6 (1.25 - 2.06) | 27 (21 - 37) | 0.38 (0.29 - 0.51) | -1.49 (-1.76--1.22) |  |
| Russian Federation | 7257 (5828 - 8792) | 9.2 (7.46 - 11.12) | 511 (372 - 686) | 0.77 (0.56 - 1.02) | -6.05 (-6.33--5.78) |  |
| Rwanda | 1087 (783 - 1467) | 33.17 (23.85 - 44.98) | 1122 (743 - 1631) | 15.75 (10.48 - 22.73) | -2.33 (-2.8--1.86) |  |
| Saint Kitts and Nevis | 0 (0 - 0) | 0.71 (0.58 - 0.88) | 0 (0 - 0) | 1.28 (0.95 - 1.65) | 1.18 (0.88-1.48) |  |
| Saint Lucia | 1 (0 - 1) | 0.73 (0.59 - 0.9) | 0 (0 - 1) | 0.5 (0.38 - 0.65) | -0.25 (-0.39--0.11) |  |
| Saint Vincent and the Grenadines | 7 (6 - 9) | 12.76 (10.03 - 16.01) | 5 (4 - 7) | 9.5 (7.23 - 12.14) | -0.62 (-1.05--0.19) |  |
| Samoa | 2 (1 - 3) | 2.32 (1.3 - 3.68) | 2 (1 - 4) | 2.3 (1.31 - 3.84) | 0.66 (0.31-1.01) |  |
| San Marino | 0 (0 - 0) | 0.37 (0.23 - 0.55) | 0 (0 - 0) | 0.25 (0.16 - 0.39) | -0.2 (-0.23--0.17) |  |
| Sao Tome and Principe | 33 (16 - 56) | 61.77 (32.64 - 101.46) | 21 (10 - 38) | 17.64 (8.93 - 31.8) | -4.52 (-5.35--3.68) |  |
| Saudi Arabia | 436 (242 - 697) | 6.74 (3.73 - 10.68) | 217 (139 - 322) | 1 (0.64 - 1.47) | -3.85 (-4.16--3.55) |  |
| Senegal | 4004 (2950 - 5218) | 109.09 (81.94 - 141.94) | 7410 (4901 - 10793) | 90.43 (60.87 - 129.22) | 0.31 (-0.05-0.67) |  |
| Serbia | 40 (27 - 56) | 0.86 (0.58 - 1.2) | 8 (5 - 11) | 0.2 (0.14 - 0.29) | -1.48 (-1.57--1.39) |  |
| Seychelles | 1 (1 - 2) | 3.64 (2.44 - 5.12) | 1 (1 - 2) | 2.79 (1.84 - 4.02) | -0.69 (-0.83--0.55) |  |
| Sierra Leone | 868 (565 - 1223) | 42.58 (27.97 - 59.8) | 3025 (1809 - 4637) | 63.26 (37.9 - 97.15) | 1.73 (1.6-1.87) |  |
| Singapore | 55 (44 - 69) | 2.7 (2.18 - 3.39) | 9 (7 - 12) | 0.33 (0.27 - 0.41) | -3.16 (-3.34--2.97) |  |
| Slovakia | 47 (31 - 65) | 1.76 (1.16 - 2.45) | 9 (6 - 12) | 0.38 (0.26 - 0.53) | -1.76 (-2.15--1.37) |  |
| Slovenia | 20 (16 - 25) | 1.94 (1.55 - 2.42) | 2 (1 - 2) | 0.22 (0.14 - 0.32) | -2.41 (-2.78--2.03) |  |
| Solomon Islands | 53 (24 - 89) | 33.05 (14.76 - 55.64) | 153 (93 - 232) | 42.62 (25.92 - 64.3) | 0.88 (0.7-1.06) |  |
| Somalia | 2202 (1491 - 3053) | 66.73 (44.7 - 94.17) | 3679 (2506 - 5199) | 39.55 (26.65 - 56.12) | -1.57 (-1.73--1.41) |  |
| South Africa | 11756 (7853 - 16613) | 57.93 (38.57 - 81.86) | 3809 (2771 - 4966) | 11.74 (8.53 - 15.21) | -3.72 (-5.16--2.27) |  |
| South Korea | 177 (138 - 224) | 0.64 (0.5 - 0.81) | 33 (23 - 45) | 0.15 (0.1 - 0.2) | -1.13 (-1.23--1.04) |  |
| South Sudan | 1422 (865 - 2097) | 56.16 (34.04 - 82.94) | 1911 (1246 - 2819) | 41.88 (27.36 - 61.72) | -0.51 (-0.87--0.14) |  |
| Spain | 139 (111 - 169) | 0.71 (0.57 - 0.87) | 55 (40 - 76) | 0.3 (0.22 - 0.4) | -0.72 (-0.81--0.63) |  |
| Sri Lanka | 2816 (1781 - 4078) | 28.45 (17.95 - 41.08) | 808 (473 - 1277) | 7.45 (4.35 - 11.83) | -4.4 (-4.67--4.12) |  |
| Sudan | 792 (551 - 1146) | 8.08 (5.59 - 11.8) | 808 (417 - 1339) | 3.38 (1.76 - 5.64) | -2.27 (-2.77--1.77) |  |
| Suriname | 33 (18 - 50) | 15.65 (8.71 - 23.64) | 45 (27 - 68) | 15.63 (9.35 - 23.47) | 0.36 (-0.1-0.82) |  |
| Swaziland | 139 (80 - 210) | 35.33 (20.13 - 53.55) | 132 (58 - 241) | 20.17 (8.78 - 36.71) | -0.99 (-1.48--0.5) |  |
| Sweden | 34 (24 - 47) | 0.86 (0.61 - 1.2) | 19 (12 - 31) | 0.43 (0.26 - 0.68) | -0.63 (-0.82--0.44) |  |
| Switzerland | 35 (28 - 45) | 0.98 (0.77 - 1.23) | 13 (9 - 19) | 0.32 (0.23 - 0.45) | -1.41 (-1.49--1.32) |  |
| Syria | 175 (115 - 249) | 3.03 (1.99 - 4.4) | 28 (17 - 43) | 0.38 (0.23 - 0.57) | -4.01 (-4.23--3.78) |  |
| Taiwan | 111 (87 - 136) | 0.91 (0.72 - 1.11) | 52 (40 - 68) | 0.46 (0.35 - 0.6) | -0.61 (-0.82--0.4) |  |
| Tajikistan | 61 (46 - 78) | 2.25 (1.73 - 2.84) | 45 (30 - 62) | 0.82 (0.55 - 1.14) | -1.92 (-2.32--1.52) |  |
| Tanzania | 13892 (10428 - 18006) | 113 (84.15 - 145.55) | 15371 (10108 - 22825) | 47.41 (31.33 - 69.25) | -2.34 (-2.54--2.14) |  |
| Thailand | 934 (538 - 1507) | 2.73 (1.56 - 4.39) | 484 (308 - 776) | 1.62 (1.02 - 2.59) | -1.69 (-2.39--0.98) |  |
| The Bahamas | 4 (3 - 5) | 2.61 (2.04 - 3.28) | 23 (17 - 31) | 10.96 (8.02 - 14.93) | 4.05 (3.11-4.99) |  |
| The Gambia | 655 (425 - 893) | 138.26 (91.11 - 188.66) | 1594 (900 - 2371) | 122.38 (71.67 - 184.28) | -0.66 (-0.98--0.34) |  |
| Timor-Leste | 18 (13 - 25) | 5.16 (3.63 - 6.92) | 36 (23 - 53) | 5.7 (3.65 - 8.69) | 0.01 (-0.27-0.3) |  |
| Togo | 1910 (1295 - 2599) | 109.42 (74.69 - 148.17) | 1827 (1027 - 2763) | 41.41 (23.29 - 62.91) | -3.34 (-3.74--2.93) |  |
| Tokelau | 0 (0 - 0) | 9.68 (4.81 - 17.7) | 0 (0 - 0) | 8.22 (4.87 - 12.86) | -1.39 (-1.84--0.94) |  |
| Tonga | 3 (2 - 4) | 5.38 (3.36 - 8.1) | 2 (1 - 3) | 3.65 (2.15 - 6.08) | -0.03 (-0.55-0.49) |  |
| Trinidad and Tobago | 6 (5 - 8) | 0.93 (0.75 - 1.14) | 47 (32 - 68) | 7.33 (5.02 - 10.41) | 5.43 (4.32-6.56) |  |
| Tunisia | 105 (71 - 149) | 2.41 (1.62 - 3.42) | 61 (34 - 106) | 1.01 (0.54 - 1.73) | -1.76 (-1.88--1.65) |  |
| Turkey | 859 (545 - 1237) | 2.92 (1.83 - 4.19) | 210 (140 - 321) | 0.49 (0.32 - 0.74) | -3.11 (-3.43--2.79) |  |
| Turkmenistan | 44 (34 - 58) | 2.28 (1.74 - 2.95) | 38 (27 - 53) | 1.47 (1.05 - 2.05) | -0.79 (-0.99--0.59) |  |
| Tuvalu | 1 (0 - 1) | 15.32 (8.06 - 29.41) | 0 (0 - 1) | 6.46 (3.59 - 10.81) | -2.52 (-2.6--2.44) |  |
| Uganda | 3153 (2041 - 4676) | 40.49 (26.47 - 59.53) | 12103 (7657 - 17040) | 55.62 (35.31 - 78.54) | 0.72 (0.14-1.3) |  |
| Ukraine | 246 (191 - 322) | 1.03 (0.8 - 1.35) | 80 (50 - 117) | 0.43 (0.27 - 0.63) | -0.74 (-0.96--0.51) |  |
| United Arab Emirates | 13 (7 - 23) | 1.75 (0.96 - 3.05) | 10 (7 - 15) | 0.33 (0.21 - 0.53) | -2.48 (-2.85--2.11) |  |
| United Kingdom | 398 (325 - 486) | 1.38 (1.13 - 1.68) | 111 (79 - 153) | 0.35 (0.25 - 0.49) | -1.68 (-1.78--1.59) |  |
| United States | 3147 (2491 - 3834) | 2.37 (1.88 - 2.9) | 932 (745 - 1158) | 0.62 (0.5 - 0.77) | -2.01 (-2.28--1.74) |  |
| Uruguay | 11 (8 - 16) | 0.74 (0.5 - 1.04) | 11 (8 - 15) | 0.69 (0.5 - 0.94) | -0.18 (-0.36-0) |  |
| Uzbekistan | 189 (144 - 246) | 1.76 (1.36 - 2.27) | 100 (73 - 136) | 0.54 (0.4 - 0.74) | -1.48 (-1.75--1.2) |  |
| Vanuatu | 6 (3 - 11) | 8.1 (4.21 - 14.38) | 14 (8 - 23) | 8.38 (4.61 - 13.87) | -0.05 (-0.23-0.13) |  |
| Venezuela | 395 (328 - 475) | 3.8 (3.16 - 4.56) | 334 (229 - 464) | 2.61 (1.78 - 3.62) | -0.53 (-0.88--0.18) |  |
| Vietnam | 874 (446 - 1526) | 2.31 (1.18 - 4.07) | 1162 (633 - 1947) | 2.27 (1.24 - 3.87) | 0.27 (0.14-0.4) |  |
| Virgin Islands, U.S. | 1 (0 - 1) | 1.03 (0.64 - 1.51) | 0 (0 - 0) | 0.37 (0.21 - 0.58) | 0.4 (0.2-0.6) |  |
| Yemen | 466 (231 - 795) | 8.53 (4.39 - 14.65) | 1340 (567 - 2540) | 7.88 (3.38 - 14.85) | -0.32 (-0.85-0.21) |  |
| Zambia | 2611 (1846 - 3549) | 70.88 (49.74 - 97.14) | 3800 (2306 - 5863) | 36.57 (22.33 - 56.57) | -2.1 (-2.3--1.9) |  |
| Zimbabwe | 3483 (2361 - 4785) | 70.43 (48.32 - 96.89) | 8501 (5228 - 13313) | 99.04 (60.61 - 156.28) | 3.2 (2.13-4.27) |  |

CI: confidence interval, DALYs: Disability-adjusted life years, EAPC: estimated annual percent change, EP: ectopic pregnancy, UI: uncertainty interval

| **Table S5. Changes in EP’s DALYs number according to population-level determinants and causes from 1990 to 2021.** | | | | |  |  |  |
| --- | --- | --- | --- | --- | --- | --- | --- |
| **Location** | **Overall difference** | **Change due to Population-level determinants** | | | **percentage contribute to the total changes** | | |
|  |
| **Ageing** | **Population** | **Epidemiological change** | **Ageing (%)** | **Population (%)** | **Epidemiological change (%)** |  |
| Global | 1069611696 | -144206119.2 | 670951121.8 | 542866693.2 | -13.48 | 62.73 | 50.75 |  |
| **SDI** |  |  |  |  |  |  |  |  |
| High-middle SDI | 26248857.21 | -98359608.04 | 48229401.71 | 76379063.55 | -374.72 | 183.74 | 290.98 |  |
| High SDI | 60149574.76 | -54059479.74 | 44803996.74 | 69405057.76 | -89.88 | 74.49 | 115.39 |  |
| Low SDI | 285721758.9 | 17153097.85 | 189505253.3 | 79063407.71 | 6 | 66.33 | 27.67 |  |
| Low-middle SDI | 362595613.2 | -53795141.21 | 255906519.8 | 160484234.6 | -14.84 | 70.58 | 44.26 |  |
| Middle SDI | 296960358.7 | -80009231.73 | 200322959.6 | 176646630.8 | -26.94 | 67.46 | 59.48 |  |
| **Region** |  |  |  |  |  |  |  |  |
| Andean Latin America | 12236553.11 | 82669.225 | 7627114.996 | 4526768.885 | 0.68 | 62.33 | 36.99 |  |
| Australasia | 3272984.42 | -1333033.141 | 2632890.527 | 1973127.036 | -40.73 | 80.44 | 60.29 |  |
| Caribbean | 5700534.95 | -1165109.238 | 3297472.39 | 3568171.796 | -20.44 | 57.84 | 62.6 |  |
| Central Asia | 12913457.27 | -439621.687 | 6685581.623 | 6667497.337 | -3.4 | 51.77 | 51.63 |  |
| Central Europe | 1424934.74 | -5048332.71 | -2074728.125 | 8547995.57 | -354.29 | -145.6 | 599.89 |  |
| Central Latin America | 41625170.76 | -2280490.879 | 25425205.54 | 18480456.1 | -5.48 | 61.08 | 44.4 |  |
| Central Sub-Saharan Africa | 44101575.81 | 6704138.334 | 27107850.52 | 10289586.95 | 15.2 | 61.47 | 23.33 |  |
| East Asia | 49813391.96 | -125071822.5 | 67230524.62 | 107654689.8 | -251.08 | 134.96 | 216.12 |  |
| Eastern Europe | 3008819.35 | -8135881.122 | -4346061.807 | 15490762.28 | -270.4 | -144.44 | 514.84 |  |
| Eastern Sub-Saharan Africa | 96866132.15 | 7538562.702 | 62899782.77 | 26427786.68 | 7.78 | 64.93 | 27.29 |  |
| High-income Asia Pacific | -1662037.51 | -16938028.49 | 2800894.203 | 12475096.78 | 1019.11 | -168.52 | -750.59 |  |
| High-income North America | 31956025.81 | -14406773.65 | 21379325.5 | 24983473.96 | -45.08 | 66.9 | 78.18 |  |
| North Africa and Middle East | 113890020.4 | -7460558.976 | 77942328.54 | 43408250.88 | -6.55 | 68.44 | 38.11 |  |
| Oceania | 2833721.88 | 17339.622 | 1959425.589 | 856956.664 | 0.61 | 69.15 | 30.24 |  |
| South Asia | 368965952.8 | 6258644.624 | 226563382.9 | 136143925.3 | 1.7 | 61.4 | 36.9 |  |
| Southeast Asia | 92152483.94 | -28830760.68 | 67070264.57 | 53912980.04 | -31.29 | 72.78 | 58.51 |  |
| Southern Latin America | 9434285.17 | -125874.544 | 4753528.371 | 4806631.341 | -1.33 | 50.39 | 50.94 |  |
| Southern Sub-Saharan Africa | 13805774.28 | 159376.493 | 7754585.177 | 5891812.607 | 1.15 | 56.17 | 42.68 |  |
| Tropical Latin America | 33301668.63 | -4381710.345 | 21202871.57 | 16480507.41 | -13.16 | 63.67 | 49.49 |  |
| Western Europe | 20089126.42 | -20464521.99 | 11158837.91 | 29394810.5 | -101.87 | 55.55 | 146.32 |  |
| Western Sub-Saharan Africa | 133032743.2 | 4022789.161 | 94758460.17 | 34251493.82 | 3.02 | 71.23 | 25.75 |  |

EP: ectopic pregnancy, DALYs: disability-adjusted life years

| **Table S6. Frontier DALYs, and effective difference in some countries or territories.** | | | | |
| --- | --- | --- | --- | --- |
| **Location** | **Age standardized DALYs** | **Frontier DALYs** | **Effective difference** | **Trend** |
| Democratic Republic of the Congo | 130.80 | 1.65 | 129.15 | Increase |
| The Gambia | 122.38 | 0.09 | 122.29 | Decrease |
| Chad | 126.30 | 4.41 | 121.89 | Increase |
| Eritrea | 118.18 | 1.33 | 116.86 | Increase |
| Angola | 104.45 | 0.95 | 103.51 | Increase |
| Guinea-Bissau | 103.74 | 1.85 | 101.89 | Decrease |
| Zimbabwe | 99.04 | 0.71 | 98.33 | Increase |
| Central African Republic | 94.45 | 2.89 | 91.56 | Decrease |
| Congo | 91.63 | 0.26 | 91.38 | Decrease |
| Senegal | 90.43 | 1.24 | 89.19 | Decrease |
| Guinea | 92.04 | 2.86 | 89.17 | Decrease |
| Djibouti | 86.75 | 0.64 | 86.12 | Decrease |
| Madagascar | 84.33 | 1.51 | 82.82 | Decrease |
| Burkina Faso | 76.60 | 4.15 | 72.45 | Decrease |
| Burundi | 75.44 | 4.15 | 71.29 | Decrease |
| Cote d'Ivoire | 70.08 | 0.09 | 70.00 | Decrease |
| Sierra Leone | 63.26 | 1.73 | 61.54 | Increase |
| Mozambique | 63.17 | 2.87 | 60.30 | Decrease |
| Uganda | 55.62 | 1.13 | 54.50 | Increase |
| Tanzania | 47.41 | 0.09 | 47.32 | Decrease |
| Ethiopia | 48.14 | 1.75 | 46.38 | Decrease |
| Mauritania | 44.66 | 0.60 | 44.05 | Decrease |
| Malawi | 45.62 | 1.66 | 43.96 | Decrease |
| Liberia | 45.43 | 1.84 | 43.59 | Decrease |
| Niger | 81.11 | 39.55 | 41.55 | Decrease |
| Solomon Islands | 42.62 | 1.10 | 41.52 | Increase |
| Kenya | 41.47 | 0.57 | 40.90 | Decrease |
| Togo | 41.41 | 1.25 | 40.17 | Decrease |
| Zambia | 36.57 | 0.59 | 35.98 | Decrease |
| Namibia | 35.99 | 0.22 | 35.77 | Decrease |
| Benin | 37.03 | 1.60 | 35.42 | Decrease |
| Cameroon | 33.42 | 0.71 | 32.71 | Decrease |
| Lesotho | 33.13 | 0.58 | 32.55 | Decrease |
| Comoros | 30.72 | 0.71 | 30.02 | Decrease |
| Haiti | 29.07 | 1.04 | 28.03 | Increase |
| Guyana | 27.38 | 0.22 | 27.16 | Increase |
| Botswana | 26.29 | 0.21 | 26.08 | Decrease |
| Gabon | 22.65 | 0.22 | 22.44 | Decrease |
| Nigeria | 22.69 | 0.61 | 22.08 | Decrease |
| Swaziland | 20.17 | 0.09 | 20.08 | Decrease |
| Sao Tome and Principe | 17.64 | 0.59 | 17.05 | Decrease |
| Suriname | 15.63 | 0.22 | 15.41 | Decrease |
| Rwanda | 15.75 | 1.05 | 14.69 | Decrease |
| Dominica | 13.79 | 0.18 | 13.61 | Increase |
| Nauru | 13.27 | 0.22 | 13.06 | Decrease |
| Marshall Islands | 12.78 | 0.26 | 12.52 | Decrease |
| Myanmar | 12.64 | 0.40 | 12.24 | Increase |
| Bolivia | 11.93 | 0.09 | 11.85 | Increase |
| South Africa | 11.74 | 0.20 | 11.54 | Decrease |
| The Bahamas | 10.96 | 0.09 | 10.88 | Increase |
| Indonesia | 10.59 | 0.21 | 10.37 | Decrease |
| Cambodia | 10.97 | 0.71 | 10.26 | Decrease |
| Palau | 10.16 | 0.18 | 9.98 | Decrease |
| Cape Verde | 9.85 | 0.09 | 9.77 | Decrease |
| Fiji | 9.80 | 0.19 | 9.61 | Decrease |
| Saint Vincent and the Grenadines | 9.50 | 0.21 | 9.29 | Decrease |
| Guatemala | 9.41 | 0.30 | 9.10 | Decrease |
| American Samoa | 8.81 | 0.18 | 8.63 | Increase |
| Tokelau | 8.22 | 0.19 | 8.03 | Decrease |
| Afghanistan | 10.81 | 2.86 | 7.95 | Increase |
| Kiribati | 8.41 | 0.57 | 7.85 | Decrease |
| Barbados | 7.96 | 0.18 | 7.78 | Increase |
| Vanuatu | 8.38 | 0.71 | 7.68 | Increase |
| Sri Lanka | 7.45 | 0.19 | 7.26 | Decrease |
| Trinidad and Tobago | 7.33 | 0.16 | 7.17 | Increase |
| Yemen | 7.88 | 1.00 | 6.88 | Decrease |
| Laos | 6.63 | 0.09 | 6.54 | Decrease |
| Papua New Guinea | 7.54 | 1.15 | 6.38 | Decrease |
| Tuvalu | 6.46 | 0.27 | 6.20 | Decrease |
| Bangladesh | 6.67 | 0.64 | 6.02 | Increase |
| Philippines | 6.22 | 0.22 | 6.01 | Decrease |
| Northern Mariana Islands | 6.05 | 0.16 | 5.90 | Increase |
| Niue | 5.48 | 0.18 | 5.30 | Increase |
| Timor-Leste | 5.70 | 1.05 | 4.65 | Increase |
| Federated States of Micronesia | 4.39 | 0.09 | 4.31 | Decrease |
| Jamaica | 4.49 | 0.19 | 4.30 | Increase |
| Brunei | 4.38 | 0.09 | 4.30 | Decrease |
| Grenada | 4.25 | 0.19 | 4.06 | Increase |
| Antigua and Barbuda | 4.17 | 0.18 | 3.99 | Increase |
| Mauritius | 4.00 | 0.18 | 3.82 | Increase |
| Ecuador | 4.02 | 0.21 | 3.82 | Increase |
| Dominican Republic | 3.72 | 0.22 | 3.50 | Increase |
| Tonga | 3.65 | 0.22 | 3.44 | Decrease |
| North Korea | 3.48 | 0.09 | 3.39 | Decrease |
| Belize | 3.48 | 0.22 | 3.27 | Increase |
| Panama | 3.35 | 0.18 | 3.17 | Decrease |
| Sudan | 3.38 | 0.35 | 3.04 | Decrease |
| Bhutan | 3.47 | 0.73 | 2.74 | Decrease |
| Malaysia | 2.90 | 0.18 | 2.72 | Decrease |
| Seychelles | 2.79 | 0.18 | 2.62 | Decrease |
| Venezuela | 2.61 | 0.09 | 2.52 | Decrease |
| Colombia | 2.60 | 0.21 | 2.39 | Decrease |
| Vietnam | 2.27 | 0.09 | 2.18 | Decrease |
| Samoa | 2.30 | 0.22 | 2.08 | Decrease |
| Cuba | 2.19 | 0.19 | 2.01 | Increase |
| Mongolia | 2.10 | 0.22 | 1.88 | Increase |
| Morocco | 2.23 | 0.35 | 1.88 | Decrease |
| Brazil | 2.05 | 0.21 | 1.84 | Decrease |
| Iraq | 1.96 | 0.20 | 1.76 | Decrease |
| Paraguay | 1.97 | 0.21 | 1.76 | Decrease |
| India | 1.97 | 0.26 | 1.72 | Decrease |
| Mexico | 1.88 | 0.20 | 1.68 | Decrease |
| Thailand | 1.62 | 0.19 | 1.43 | Decrease |
| El Salvador | 1.63 | 0.35 | 1.29 | Decrease |
| Turkmenistan | 1.47 | 0.19 | 1.28 | Decrease |
| Nepal | 2.34 | 1.09 | 1.25 | Decrease |
| Guam | 1.28 | 0.11 | 1.17 | Decrease |
| Egypt | 1.36 | 0.21 | 1.15 | Decrease |
| Saint Kitts and Nevis | 1.28 | 0.18 | 1.10 | Increase |
| Kyrgyzstan | 1.25 | 0.22 | 1.03 | Decrease |
| Saudi Arabia | 1.00 | 0.09 | 0.91 | Decrease |
| Argentina | 1.08 | 0.18 | 0.90 | Decrease |
| Algeria | 1.06 | 0.21 | 0.85 | Decrease |
| Tunisia | 1.01 | 0.19 | 0.82 | Decrease |
| China | 0.95 | 0.18 | 0.77 | Decrease |
| Chile | 0.92 | 0.15 | 0.77 | Decrease |
| Libya | 0.91 | 0.18 | 0.73 | Decrease |
| Russian Federation | 0.77 | 0.09 | 0.67 | Decrease |
| Bahrain | 0.76 | 0.18 | 0.58 | Decrease |
| United States | 0.62 | 0.09 | 0.54 | Decrease |
| Uruguay | 0.69 | 0.18 | 0.51 | Decrease |
| Belarus | 0.63 | 0.12 | 0.51 | Decrease |
| Greenland | 0.59 | 0.09 | 0.50 | Decrease |
| Iran | 0.57 | 0.09 | 0.49 | Decrease |
| Maldives | 0.70 | 0.21 | 0.48 | Decrease |
| Cyprus | 0.57 | 0.09 | 0.48 | Decrease |
| Tajikistan | 0.82 | 0.36 | 0.46 | Decrease |
| Jordan | 0.61 | 0.18 | 0.43 | Decrease |
| Turkey | 0.49 | 0.09 | 0.40 | Decrease |
| Puerto Rico | 0.49 | 0.09 | 0.40 | Decrease |
| Estonia | 0.48 | 0.09 | 0.40 | Decrease |
| Austria | 0.48 | 0.09 | 0.39 | Decrease |
| Israel | 0.48 | 0.09 | 0.39 | Decrease |
| Latvia | 0.47 | 0.09 | 0.38 | Decrease |
| Taiwan | 0.46 | 0.09 | 0.37 | Decrease |
| Sweden | 0.43 | 0.09 | 0.34 | Decrease |
| Kuwait | 0.42 | 0.09 | 0.34 | Increase |
| Malta | 0.44 | 0.11 | 0.33 | Decrease |
| Uzbekistan | 0.54 | 0.22 | 0.33 | Decrease |
| Denmark | 0.41 | 0.09 | 0.32 | Decrease |
| Lithuania | 0.41 | 0.09 | 0.32 | Decrease |
| Saint Lucia | 0.50 | 0.19 | 0.31 | Decrease |
| Costa Rica | 0.49 | 0.19 | 0.30 | Decrease |
| Slovakia | 0.38 | 0.09 | 0.29 | Decrease |
| Syria | 0.38 | 0.09 | 0.29 | Decrease |
| Monaco | 0.38 | 0.09 | 0.29 | Decrease |
| New Zealand | 0.37 | 0.09 | 0.28 | Decrease |
| Greece | 0.40 | 0.12 | 0.28 | Decrease |
| Virgin Islands, U.S. | 0.37 | 0.09 | 0.28 | Decrease |
| Ireland | 0.36 | 0.09 | 0.28 | Decrease |
| Moldova | 0.36 | 0.09 | 0.27 | Decrease |
| United Kingdom | 0.35 | 0.09 | 0.27 | Decrease |
| Ukraine | 0.43 | 0.17 | 0.26 | Decrease |
| Hungary | 0.37 | 0.12 | 0.25 | Decrease |
| Belgium | 0.34 | 0.09 | 0.25 | Decrease |
| United Arab Emirates | 0.33 | 0.09 | 0.25 | Decrease |
| Singapore | 0.33 | 0.09 | 0.25 | Decrease |
| Switzerland | 0.32 | 0.09 | 0.24 | Decrease |
| Romania | 0.38 | 0.16 | 0.23 | Decrease |
| Bulgaria | 0.38 | 0.16 | 0.23 | Decrease |
| Netherlands | 0.31 | 0.09 | 0.22 | Decrease |
| Portugal | 0.40 | 0.18 | 0.22 | Decrease |
| Czech Republic | 0.30 | 0.09 | 0.21 | Decrease |
| Finland | 0.29 | 0.09 | 0.21 | Decrease |
| Canada | 0.29 | 0.09 | 0.20 | Decrease |
| Kazakhstan | 0.38 | 0.18 | 0.20 | Decrease |
| Oman | 0.35 | 0.16 | 0.19 | Decrease |
| San Marino | 0.25 | 0.09 | 0.16 | Decrease |
| Bermuda | 0.25 | 0.09 | 0.16 | Decrease |
| Palestine | 0.37 | 0.22 | 0.16 | Decrease |
| Qatar | 0.24 | 0.09 | 0.15 | Decrease |
| Andorra | 0.24 | 0.09 | 0.15 | Decrease |
| Iceland | 0.23 | 0.09 | 0.14 | Decrease |
| Spain | 0.30 | 0.16 | 0.14 | Decrease |
| Slovenia | 0.22 | 0.09 | 0.13 | Decrease |
| Luxembourg | 0.20 | 0.09 | 0.11 | Decrease |
| Australia | 0.19 | 0.09 | 0.11 | Decrease |
| Norway | 0.19 | 0.09 | 0.10 | Decrease |
| Montenegro | 0.22 | 0.12 | 0.10 | Decrease |
| Nicaragua | 0.67 | 0.57 | 0.09 | Decrease |
| Cook Islands | 0.23 | 0.14 | 0.09 | Decrease |
| Macedonia | 0.17 | 0.09 | 0.08 | Decrease |
| Serbia | 0.20 | 0.12 | 0.08 | Decrease |
| Italy | 0.17 | 0.10 | 0.07 | Decrease |
| South Korea | 0.15 | 0.09 | 0.06 | Decrease |
| Croatia | 0.17 | 0.12 | 0.05 | Decrease |
| Germany | 0.13 | 0.09 | 0.05 | Decrease |
| Azerbaijan | 0.22 | 0.19 | 0.04 | Decrease |
| Lebanon | 0.20 | 0.18 | 0.02 | Decrease |
| Bosnia and Herzegovina | 0.20 | 0.18 | 0.02 | Decrease |
| Armenia | 0.19 | 0.19 | 0.01 | Decrease |
| Poland | 0.09 | 0.09 | 0.00 | Decrease |
| Albania | 0.18 | 0.18 | 0.00 | Decrease |
| Honduras | 0.57 | 0.57 | 0.00 | Decrease |
| Somalia | 39.55 | 39.55 | 0.00 | Decrease |

DALYs: disability-adjusted life years

**Table S7. The changes of SII in crude DALYs rate from 1990-2021**

| **Year** | **SII** | **95% CI lower** | **95% CI upper** |
| --- | --- | --- | --- |
| 1990 | -56.68 | -63.44 | -49.93 |
| 1991 | -57.44 | -64.14 | -50.74 |
| 1992 | -56.22 | -62.68 | -49.76 |
| 1993 | -56.67 | -63.25 | -50.09 |
| 1994 | -58.20 | -64.76 | -51.63 |
| 1995 | -57.39 | -63.68 | -51.09 |
| 1996 | -57.23 | -63.31 | -51.16 |
| 1997 | -55.85 | -61.85 | -49.84 |
| 1998 | -55.50 | -61.51 | -49.50 |
| 1999 | -57.77 | -64.29 | -51.25 |
| 2000 | -58.40 | -64.95 | -51.86 |
| 2001 | -55.60 | -61.65 | -49.54 |
| 2002 | -53.05 | -58.76 | -47.34 |
| 2003 | -53.20 | -59.11 | -47.30 |
| 2004 | -52.74 | -58.66 | -46.82 |
| 2005 | -51.88 | -57.53 | -46.24 |
| 2006 | -50.43 | -55.77 | -45.09 |
| 2007 | -51.39 | -56.83 | -45.96 |
| 2008 | -50.92 | -56.02 | -45.82 |
| 2009 | -49.21 | -54.24 | -44.18 |
| 2010 | -45.45 | -50.90 | -40.01 |
| 2011 | -45.45 | -51.21 | -39.70 |
| 2012 | -44.16 | -50.43 | -37.89 |
| 2013 | -43.42 | -49.55 | -37.28 |
| 2014 | -44.26 | -50.78 | -37.73 |
| 2015 | -42.26 | -48.51 | -36.00 |
| 2016 | -40.90 | -46.89 | -34.91 |
| 2017 | -39.65 | -45.44 | -33.86 |
| 2018 | -37.49 | -42.95 | -32.04 |
| 2019 | -37.37 | -42.76 | -31.98 |
| 2020 | -38.06 | -43.45 | -32.68 |
| 2021 | -36.56 | -41.84 | -31.28 |

CI: confidence interval, DALYs: disability-adjusted life years, SII: slope index of inequality

**Figure S1**. Comparison of the numbers and ASR of incidence(A), prevalence(B), mortality(C), and DALYs(D) of EP from different age groups in global in 1990.

**Figure S2**. Comparison of the numbers and ASR of incidence(A), prevalence(B), mortality(C), and DALYs(D) of EP from different age groups in global in 2021.

**Figure S3.** Incidence (A), prevalence (B), mortality (C), and DALYs (D) for EP, grouped by global and SDI quintiles, 1990 to 2021.

**Figure S4.** Age-standardized rate of incidence (A), prevalence (B), mortality (C), and DALYs (D) for EP, grouped by global and SDI quintiles, 1990 to 2021.

**Figure S5.** ASIR of EP globally and for 21 GBD regions by SDI, 1990–2021. **
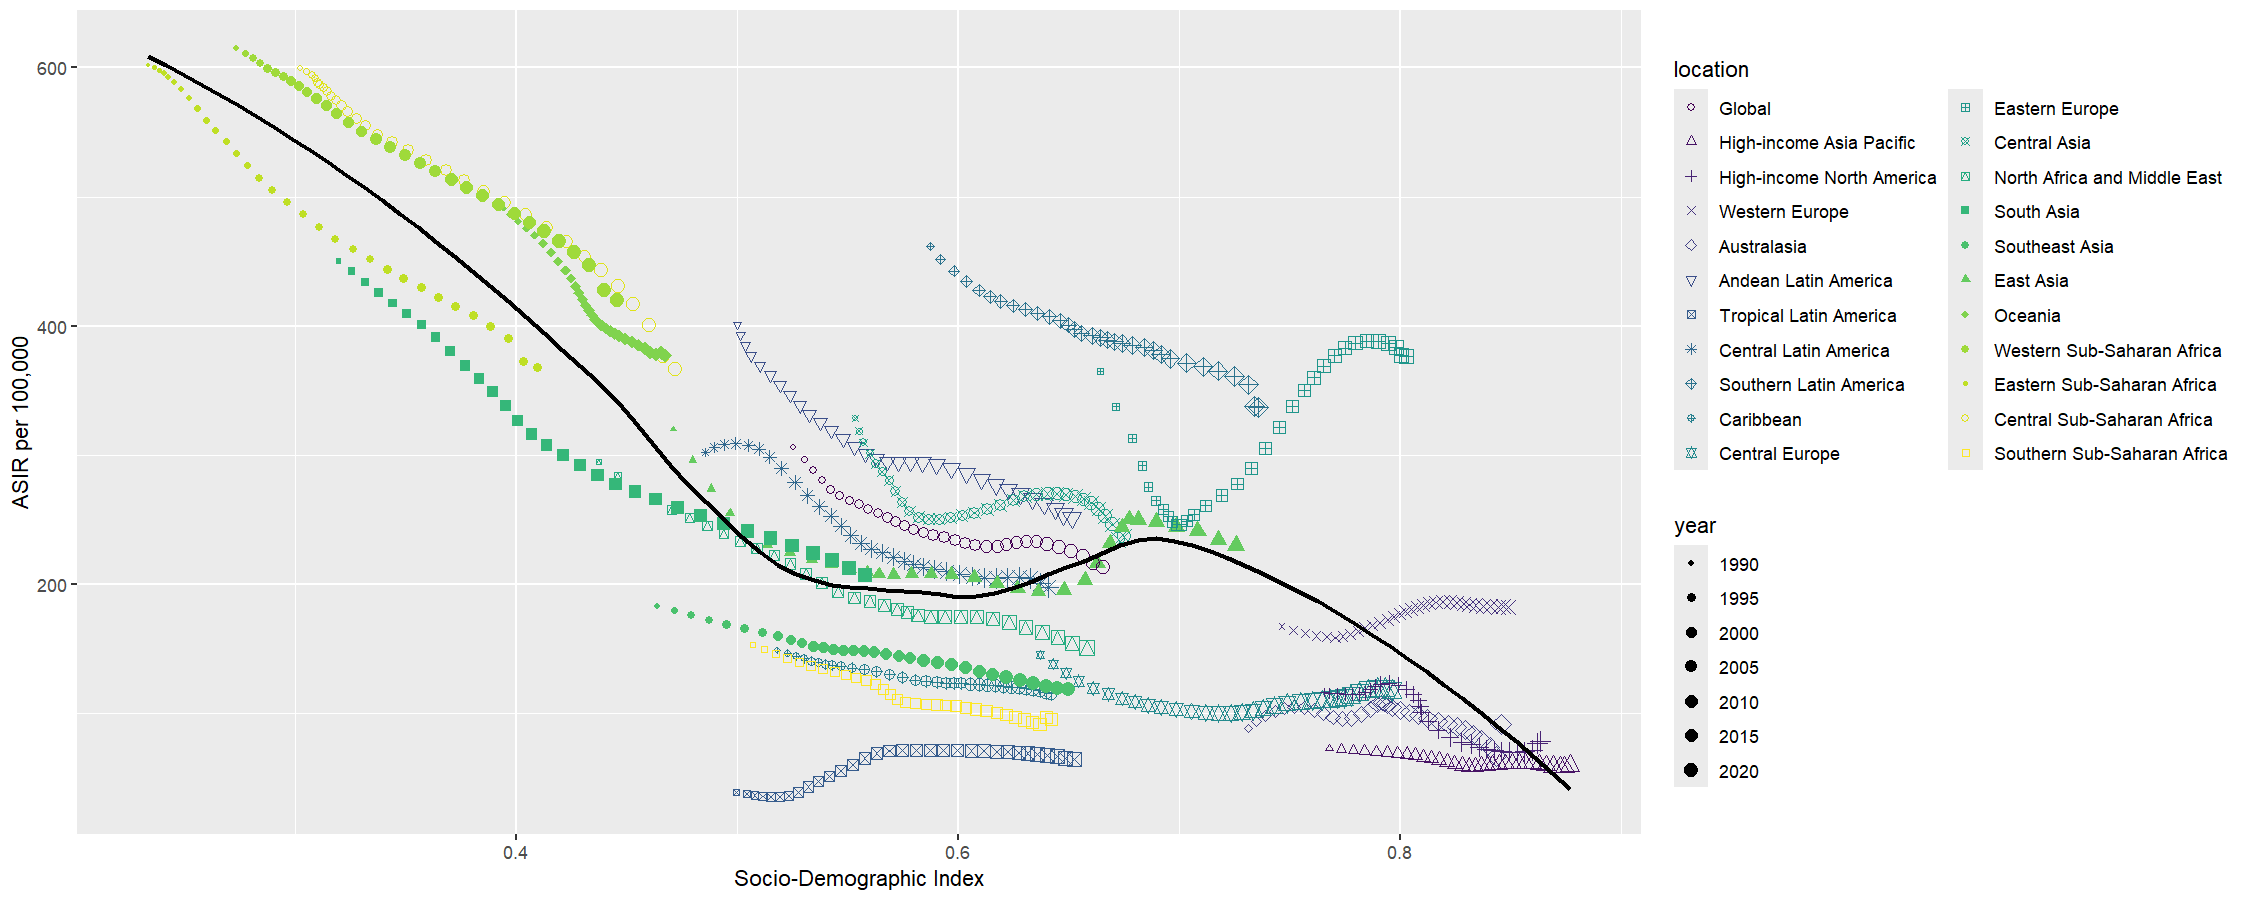
**

**Figure S6.** ASPR of EP globally and for 21 GBD regions by SDI, 1990–2021.


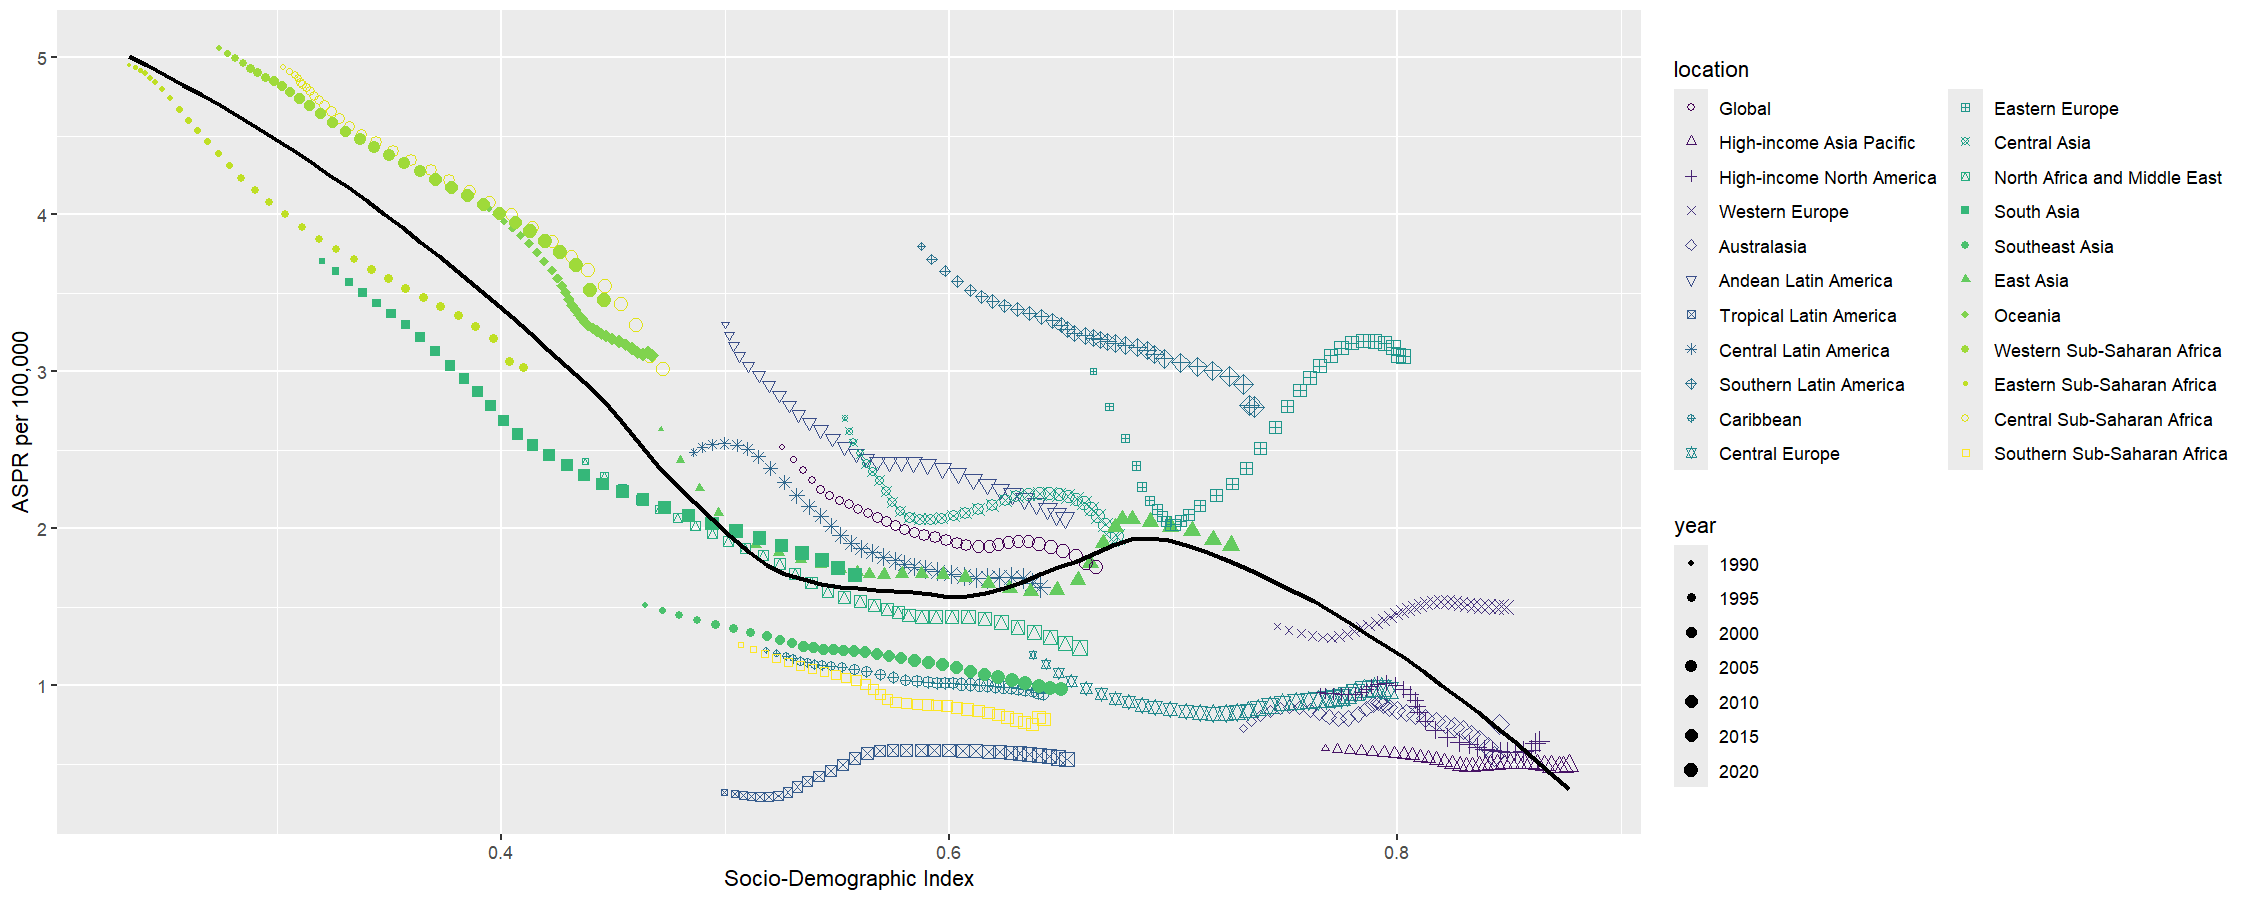


**Figure S7.** ASMR of EP globally and for 21 GBD regions by SDI, 1990–2021.


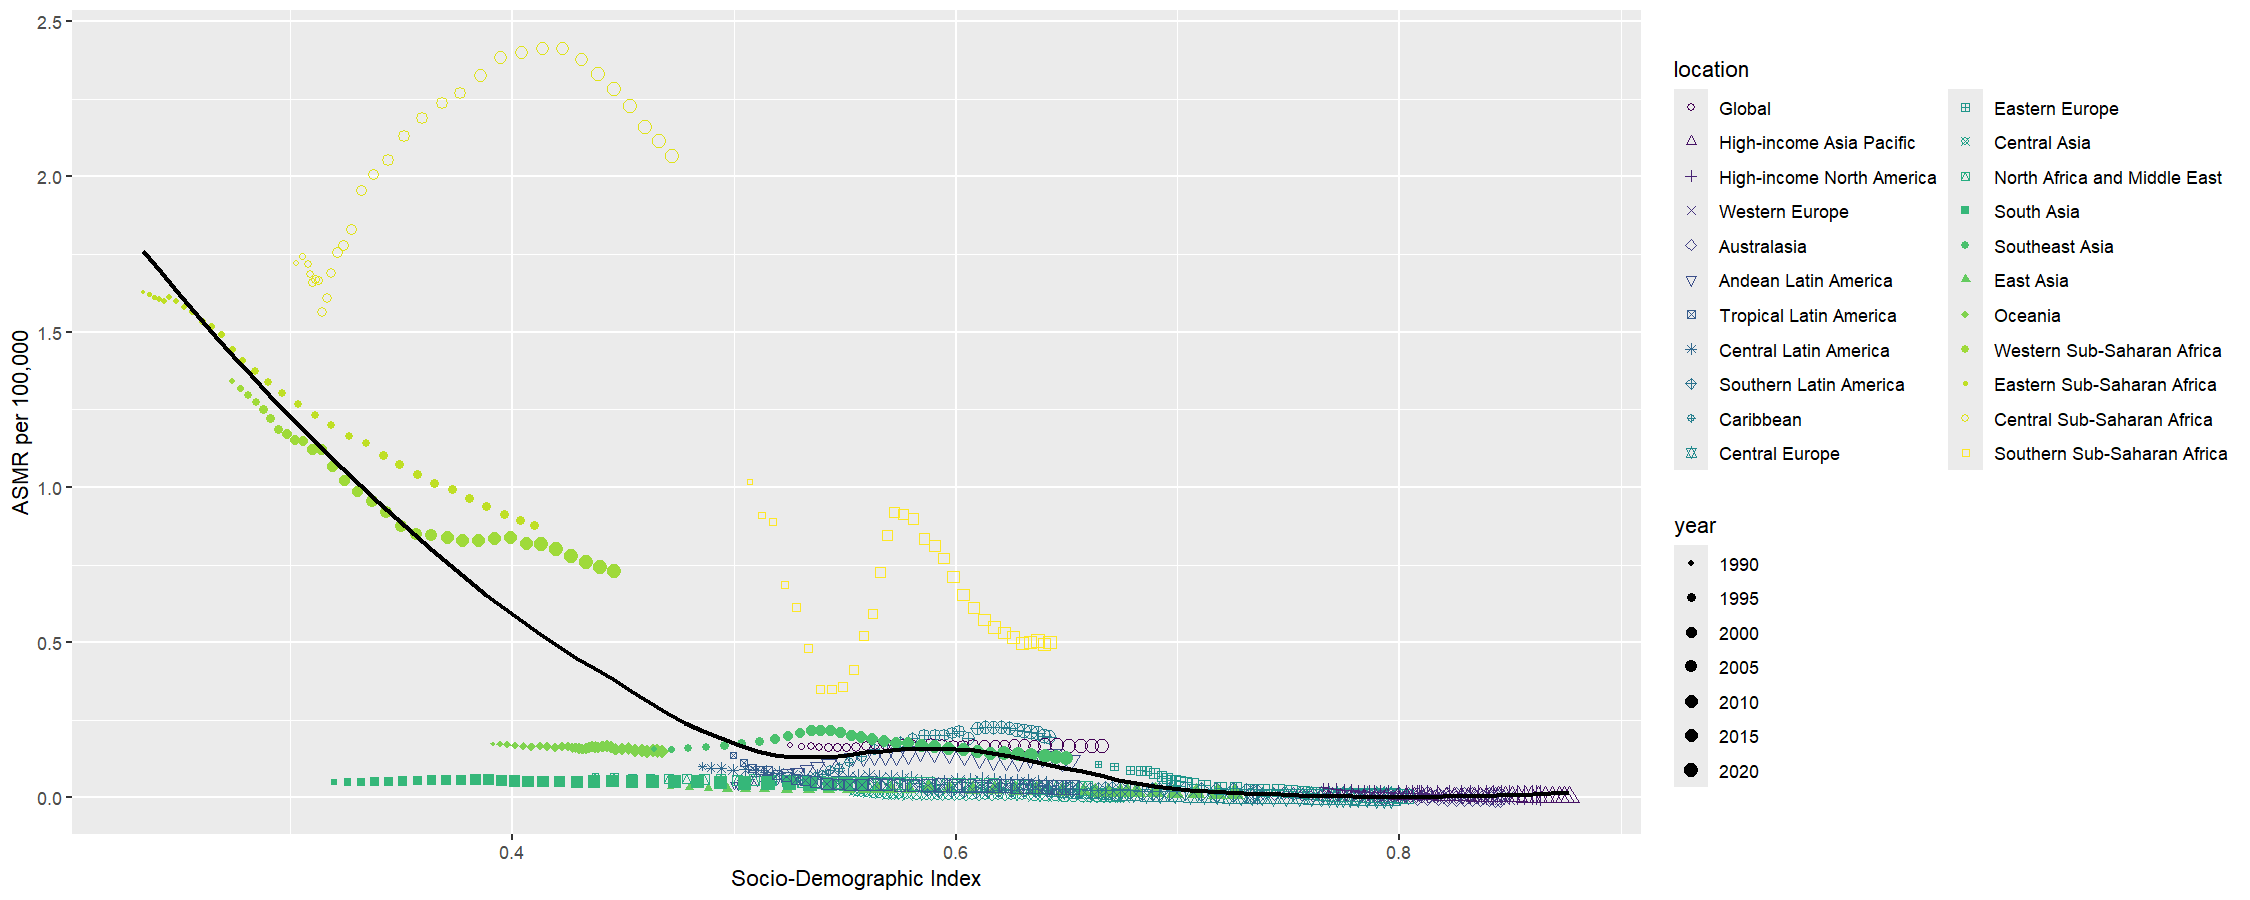


**Figure S8**. ASDR of EP globally and for 21 GBD regions by SDI, 1990–2021.**
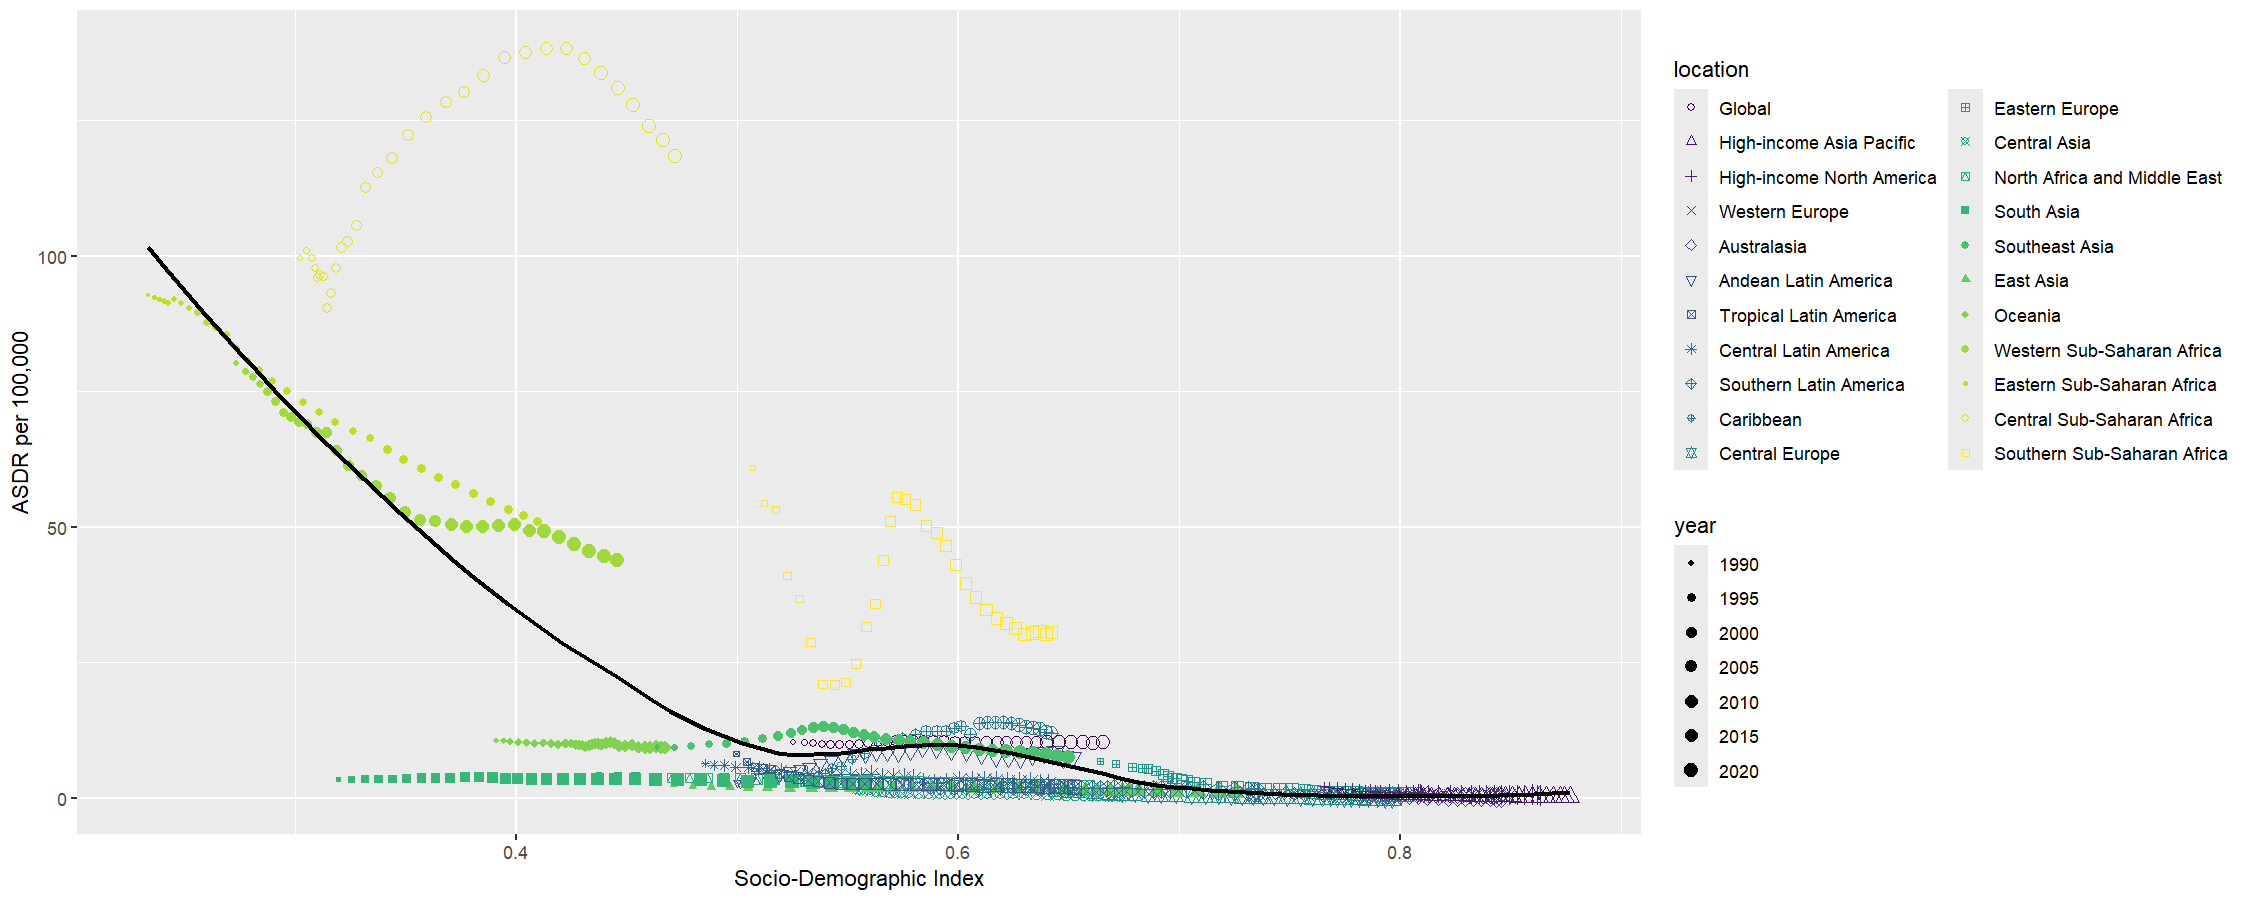
**
